# Supplementary material for: Improving partnerships to improve outcomes for children and young people with special educational needs and disabilities: qualitative findings from a mixed methods systematic review
Source: Frontiers journal article supplement (doi:10.3389/feduc.2025.1513668), 2025-02-19
Supplement: Table_3.docx [file Table_3.docx]

**Supplementary File 3: Reasons for the exclusion at full text**

| **Author/s** | **Year** | **Title** |
| --- | --- | --- |
| **Date: Too early (published before 2012) ****note a year post-2012 is the year of electronic publication, but content not changed since earlier print publication | | |
| Allen, J. | 2018 | Working with families of dual sensory impaired children: A professional perspective |
| Bale, K. | 2018 | Managing to cope: Special needs in a large primary school |
| Barnes, P. | 2013 | Working with the young child who has special needs in the hospital setting |
| Barrett, M. | 2018 | Consultation to school subsystems by a teacher |
| Beveridge, S. | 2013 | Children families and schools: Developing partnerships for inclusive education |
| Bignell, L. | 2018 | The way ahead |
| Bovair, K. | 2018 | Introduction |
| Clark, C. and Easen, P. | 2018 | Turning the kaleidoscope: Working with teachers concerned about special educational needs |
| Closs, A. | 2013 | Resources to support education staff working with children with medical conditions |
| Coombes, LINDSEY and Allen, Debby and Humphrey, Deborah and Neale, JOANNE | 2009 | In-depth interviews |
| Cowen, Alison and Murray, Pippa and Duffy, Simon | 2011 | Personalised transition: a collaborative approach to funding individual budgets for young disabled people with complex needs leaving school |
| Davies, J. D. and Garner, P. and Lee, J. | 2018 | More than just managing |
| Davies, J. D. and Garner, P. and Lee, J. | 2018 | Managing special needs in mainstream schools: The role of the SENCO |
| Duckett, T. | 2018 | Spanning the divide: The SENCO and transition |
| Evans, R. and Docking, J. | 2018 | The impact of LEA policy on the role of the SENCO |
| Fieldhouse, J. and Pascal, C. and Bertram, A. and Gatiss, S. | 2013 | Research and practice: An evaluation of an education improvement strategy to support teachers and parents of young children with special educational needs |
| Garner, P. and Sandow, S. | 2018 | Advocacy, self-advocacy and special needs |
| Garner, P. and Sandow, S. | 2018 | The potential of advocacy and self-advocacy |
| Grant, S. | 2018 | Partnership in practice: Governors and SENCOs working together |
| Greco, V., Sloper, P., Webb, R., Beecham, J. | 2005 | An exploration of different models of multiagency partnerships in key worker services for disabled children: effectiveness and costs |
| Greco, Veronica and Sloper, Patricia and Webb, Rosemary and Beecham, Jennifer | 2007 | Key worker services for disabled children: the views of parents |
| Griffiths, F. | 2013 | Communication counts: Speech and language difficulties in the early years |
| Harris, N. and Riddell, S. | 2016 | Resolving Additional Support Needs Disputes in Scotland: Contesting Professionalism and Rights |
| Hawkins, E. and Derrick, J. | 2018 | Summer projects for children with language difficulties |
| Holubecki, M. | 2013 | Horse whispering for humans: A sensitive approach to behaviour difficulties |
| Hume, Sharon and Rutman, Deborah | 2007 | Key Worker and Parent to Parent Support Program |
| Jacobs, B. | 2013 | Externalising disorders: Conduct disorder and hyperkinetic disorder |
| Kirton, Derek | 2008 | Child social work policy & practice |
| Parker, Wendy and Gage, Heather and Sterr, Annette | 2011 | Services for Families with Disabled Children A Scoping Study: Summary Report |
| Roberts, L. | 2013 | The school as an integrated support system for pupils with pragmatic difficulties |
| Sayer, J. and Jones, N. | 2018 | Teacher training and special educational needs |
| Sloper, Patricia and Greco, Veronica and Beecham, Jennifer and Webb, Rosemary | 2006 | Key worker services for disabled children: what characteristics of services lead to better outcomes for children and families? |
| Smith, Mary and Tett, L. Y. N. | 2022 | NEW COMMUNITY SCHOOLS AND PUPILS WITH SOCIAL, EMOTIONAL AND BEHAVIOURAL DIFFICULTIES |
| Vulliamy, G. and Webb, R. | 2018 | Teacher research and special education needs |
| Ware, J. | 2018 | Educating children with profound and multiple learning difficulties |
| Wearmouth, J. and Soler, J. and Reid, G. | 2013 | Addressing difficulties in literacy development: Responses at family, school, pupil and teacher levels |
| Webb, Rosemary and Greco, Veronica and Sloper, Patricia and Beecham, Jennifer | 2008 | Key workers and schools: meeting the needs of children and young people with disabilities |
| Wzlkinson, A. | 2017 | Complicated lives: Students with special education needs in the inner city |
| Young, A. and Temple, B. and Davies, L. and Parkinson, G. and Bolton, J. | 2008 | Disabled children (0-3 years) and integrated services--the impact of Early Support |
| **Wrong study design** | | |
| Abrahamson, V. and Zhang, W. and Wilson, P. M. and Farr, W. and Reddy, V. and Parr, J. and Peckham, A. and Male, I. | 2021 | Realist evaluation of Autism ServiCe Delivery (RE-ASCeD): which diagnostic pathways work best, for whom and in what context? Findings from a rapid realist review |
| Ahad, A. and Thompson, A. M. and Hall, K. E. | 2022 | Identifying service users' experience of the education, health and care plan process: A systematic literature review |
| Ahuja, A. S. and Crome, I. and Williams, R. | 2013 | Engaging young people who misuse substances in treatment |
| Allely, C. S. and Dubin, L. | 2018 | The contributory role of autism symptomology in child pornography offending: why there is an urgent need for empirical research in this area |
| Almqvist, Anna-Lena and Lassinantti, Kitty | 2018 | Social work practices for young people with complex needs: an integrative review |
| Alriksson-Schmidt, Ann I. and Arner, Marianne and Westbom, Lena and Krumlinde-Sundholm, Lena and Nordmark, Eva and Rodby-Bousquet, Elisabet and H√§gglund, Gunnar | 2017 | A combined surveillance program and quality register improves management of childhood disability |
| Anaby, D. and Hand, C. and Bradley, L. and DiRezze, B. | 2013 | The effect of the environment on participation of children and youth with disabilities: a scoping review |
| Anaby, Dana R. and Khan, Sitara and Tremblay, Stephanie and Campbell, Wenonah N. and Missiuna, Cheryl and Shaw, Steven R. and Bennett, Sheila and Kalubi‚ÄêLukusa, Jean‚ÄêClaude and Camden, Chantal | 2019 | Recommended practices to organize and deliver school-based services for children with disabilities: A scoping review |
| Anderson, Joanna K. and Howarth, Emma and Vainre, Maris and Jones, Peter B. and Humphrey, Ayla | 2017 | A scoping literature review of service-level barriers for access and engagement with mental health services for children and young people |
| Anonymous | 2013 | Research: case studies. Baby steps to better practice |
| Anonymous | 2013 | Public mental health commissioning guidance: embedding mental health in local public health work |
| Baker, K. | 2013 | Conduct disorders in children and adolescents |
| Baker, K. | 2016 | Conduct disorders in children and adolescents |
| Barker, R. and Bathgate, F. | 2013 | The challenges in providing rehabilitation for children with complex needs |
| Bastani, Peivand and Mohammadpour, Mohammadtaghi and Ghanbarzadegan, Arash and Rossi-Fedele, Giampiero and Peres, Marco A. | 2021 | Provision of dental services for vulnerable groups: a scoping review on children with special health care needs |
| Bellman, M. and Vijeratnam, S. | 2012 | From child health surveillance to child health promotion, and onwards: a tale of babies and bathwater |
| Bishop, C. and Small, N. and Parslow, R. and Bowles, D. | 2015 | Improving service coordination for children with complex needs |
| Blower, S. and Swallow, V. and Maturana, C. and Stones, S. and Phillips, R. and Dimitri, P. and Marshman, Z. and Knapp, P. and Dean, A. and Higgins, S. and Kellar, I. and Curtis, P. and Mills, N. and Martin-Kerry, J. | 2020 | Children and young people's concerns and needs relating to their use of health technology to self-manage long-term conditions: a scoping review |
| Bonder, Revi and Yonadam, Arbella and Snider, Andrea and Kassam-Lallani, Dilshad and McPherson, Amy C. | 2022 | Communicating about Mental Health with Youth and Their Families: A Scoping Review of Best Practices and Implications for Youth with Disabilities |
| Burch, L. F. | 2018 | Governmentality of adulthood: a critical discourse analysis of the 2014 Special Educational Needs and Disability Code of Practice |
| Butler, Michelle and et, al | 2017 | Using the voluntary sector to provide services to children and families with complex needs as an alternative to social work services: what are the benefits and risks? |
| Byrne, A. | 2013 | What factors influence the decisions of parents of children with special educational needs when choosing a secondary educational provision for their child at change of phase from primary to secondary education? A review of the literature |
| Byrne, Alison and Swords, Lorraine | 2015 | ‘Attention seeker’, ‘drama queen’‚ the power of talk in constructing identities for young people with mental health difficulties |
| Cadwgan, J. and Goodwin, J. | 2018 | Helping parents with the diagnosis of disability |
| Callaghan, J. E. and Fellin, L. C. and Warner-Gale, F. | 2017 | A critical analysis of Child and Adolescent Mental Health Services policy in England |
| Camden, C. and Wilson, B. and Kirby, A. and Sugden, D. and Missiuna, C. | 2015 | Best practice principles for management of children with developmental coordination disorder ( DCD): results of a scoping review |
| Cannon, J. E. and Kirby, S. | 2013 | Grammar structures and deaf and hard of hearing students: a review of past performance and a report of new findings |
| Castro-Kemp, S. and Samuels, A. | 2022 | Working together: A review of cross-sector collaborative practices in provision for children with special educational needs and disabilities |
| Chaney, P. | 2012 | Additional learning needs policy in the devolved polities of the UK: A systems perspective |
| Chen, Sheng and Awan, Saima and Rajji, Tarek and Abdool, Petal and George, Tony P. and Collins, April and Kidd, Sean A. | 2016 | Integrated Care Pathways for Schizophrenia: A Scoping Review |
| Cioè-Peña, M. | 2021 | Remote Schooling Supports for Linguistically Diverse Parents of Students With Disabilities |
| Clegg, J. and Murphy, E. and Almack, K. | 2017 | Liberal individualism and deleuzean relationality in intellectual disability |
| Coates, Dominiek and Foureur, Maralyn | 2019 | The role and competence of midwives in supporting women with mental health concerns during the perinatal period: A scoping review |
| Coates, J. and Vickerman, P. | 2013 | A review of methodological strategies for consulting children with special educational needs in physical education |
| Colizzi, M. and Lasalvia, A. and Ruggeri, M. | 2020 | Prevention and early intervention in youth mental health: is it time for a multidisciplinary and trans-diagnostic model for care? |
| Coussens, Marieke and et, al | 2020 | Parents' perspectives on participation of young children with attention deficit hyperactivity disorder, developmental coordination disorder, and/ or autism spectrum disorder: a systematic scoping review |
| Crosby, Nic and Donkin, Martin | 2014 | Creating an integrated, outcome-focused and family-centred offer |
| Daniels, Lynsey and Douglass, Emma | 2021 | Making effective reasonable adjustments for women with learning disabilities during pregnancy |
| Dawson-Squibb, J. J. and Davids, E. L. and de Vries, P. J. | 2019 | Scoping the evidence for EarlyBird and EarlyBird Plus, two United Kingdom-developed parent education training programmes for autism spectrum disorder |
| Dawson-Squibb, John-Joe and Davids, Eugene L. and Harrison, Ashley J. and Molony, Maggie A. and de Vries, Petrus J. | 2020 | Parent Education and Training for autism spectrum disorders: Scoping the evidence |
| Ebbels, S. H. and McCartney, E. and Slonims, V. and Dockrell, J. E. and Norbury, C. F. | 2019 | Evidence-based pathways to intervention for children with language disorders |
| Emerson, E. | 2014 | Families supporting a child with intellectual or developmental disabilities: The current state of knowledge |
| Farr, J. | 2018 | Between a rock and a hard place: the impact of the professionalization of the role of the teaching assistant in mainstream school physical education in the United Kingdom |
| Fusar-Poli, P. | 2019 | Integrated Mental Health Services for the Developmental Period (0 to 25 Years): A Critical Review of the Evidence |
| Ginsberg, Y. and Beusterien, K. M. and Amos, K. and Jousselin, C. and Asherson, P. | 2014 | The unmet needs of all adults with ADHD are not the same: A focus on Europe |
| Gopalan, Geetha and Lee, Sang Jung and Harris, Ryan and Acri, Mary C. and Munson, Michelle R. | 2017 | Utilization of peers in services for youth with emotional and behavioral challenges: A scoping review |
| Gorrie, F. and Goodall, K. and Rush, R. and Ravenscroft, J. | 2019 | Towards population screening for Cerebral Visual Impairment: Validity of the Five Questions and the CVI Questionnaire |
| Goulden, Ami | 2021 | A critical review of social work interventions and programmes that support disabled youth with their sexual well-being |
| Graham, Fiona and Boland, Pauline and Grainger, Rebecca and Wallace, Sally | 2020 | Telehealth delivery of remote assessment of wheelchair and seating needs for adults and children: a scoping review |
| Griffith, G. M. and Hastings, R. P. | 2014 | 'He's hard work, but he's worth it'. The experience of caregivers of individuals with intellectual disabilities and challenging behaviour: A meta-synthesis of qualitative research |
| Griffiths, T. and Clarke, M. and Price, K. | 2022 | Augmentative and alternative communication for children with speech, language and communication needs |
| Gudkova, Tatiana and Hedlund, Marianne and Midjo, Turid | 2019 | Supporting children of parents with intellectual disability: a scoping review |
| Halsall, Sarah and Marks-Maran, Di | 2014 | How prepared are UK midwives for their role in child protection? |
| Hamadi, L. and Hilson, R. and Lunn, A. and Ralph, E. and Rodrigues, E. and Sohail, R. | 2022 | Can CBT-E be delivered in an online group format? A pilot study of the Body Image module in a child and adolescent eating disorder service |
| Harris, P. | 2017 | Please can we have some more? |
| Hellawell, B. | 2017 | A review of parent-professional partnerships and some new obligations and concerns arising from the introduction of the SEND Code of Practice 2015 |
| Hetrick, Sarah E. and Bailey, Alan P. and Smith, Kirsten E. and Malla, Ashok and Mathias, Steve and Singh, Swaran P. and O'Reilly, Aileen and Verma, Swapna K. and Benoit, Laelia and Fleming, Theresa M. and Moro, Marie Rose and Rickwood, Debra J. and Duffy, Joseph and Eriksen, Trissel and Illback, Robert and Fisher, Caroline A. and McGorry, Patrick D. | 2017 | Integrated (one-stop shop) youth health care: best available evidence and future directions |
| Hickey, Lyndal and et, al | 2021 | The engagement of children in out-of-home care with nursing and allied health professionals: a scoping review |
| Hodge, N. | 2015 | Protecting the rights of pupils with autism when meeting the challenge of behaviour |
| Hood, Rick | 2016 | How professionals talk about complex cases: a critical discourse analysis |
| Iacobucci, G. | 2016 | Public health--the frontline cuts begin |
| Jørgensen, C. R. and Dobson, G. and Perry, T. | 2021 | Migrant children with special educational needs in European schools: A review of current issues and approaches |
| Kang, Lin-Ju and Palisano, Robert J. and King, Gillian A. and Chiarello, Lisa A. | 2014 | A multidimensional model of optimal participation of children with physical disabilities |
| Kokol, P. and Vo≈°ner, H. B. and Zavr≈°nik, J. | 2020 | Serious game-based intervention for children with developmental disabilities |
| Larkin, M. and Boden, Z. V. and Newton, E. | 2015 | On the Brink of Genuinely Collaborative Care: Experience-Based Co-Design in Mental Health |
| Law, J. and Dornstauder, M. and Charlton, J. and Greaux, M. | 2021 | Tele-practice for children and young people with communication disabilities: Employing the COM-B model to review the intervention literature and inform guidance for practitioners |
| Littlewood, H. | 2020 | The Boundary between Education and Health Care Provision in Education, Health and Care Plans: To What Extent Does the Send Tribunal Single Route of Redress |
| Loeb, M. and Mont, D. and Cappa, C. and Palma, E. De | 2018 | The development and testing of a module on child functioning for identifying children with disabilities on surveys. I: Background |
| Lusebrink, Vija Bergs and MƒÅrtinsone, Kristƒ´ne and Dzilna-≈†ilova, Ilze | 2013 | The Expressive Therapies Continuum (ETC): Interdisciplinary bases of the ETC |
| Ly, Angela and Tremblay, Gilbert A. and Beauchamp, Sylvie | 2019 | "What is the efficacy of specialised early intervention in mental health targeting simultaneously adolescents and young adults?'' An HTA |
| Marwick, H. and Sosu, E. | 2014 | Predictors of additional support needs (ASN) in Scottish schools |
| Mays, D. and Jindal-Snape, D. and Boyle, C. | 2020 | Transitions of children with additional support needs across stages |
| Mitchell, Fraser | 2012 | Self-directed support and disabled young people in transition (part 1) |
| Murray, R. | 2015 | ‘Yes They are Listening but Do They Hear Us?’ Reflections on the Journey of the Barnardo's Participation Project |
| Paulus, Frank W. and Ohmann, Susanne and Popow, Christian | 2016 | Practitioner Review: School-based interventions in child mental health |
| Sanches-Ferreira, M. and Alves, S. and Silveira-Maia, M. and Santos, M. and Tosto, C. and Chifari, A. and McGee, C. and Savio, N. L. and Bilanin, S. and Merlo, G. | 2021 | A Systematic Review of Behavioral Interventions for Elementary School Children with Social, Emotional and Behavioral Difficulties: Contributions from Single-Case Research Studies |
| Solvason, C. and Proctor, S. | 2021 | ‘You have to find the right words to be honest’: nurturing relationships between teachers and parents of children with Special Educational Needs |
| Turner, Gillian and Mackay, Sean | 2015 | The impact of school nurse interventions: Behaviour change and mental health |
| Vanegas, Sandra B. and Abdelrahim, Randa | 2016 | Characterizing the systems of support for families of children with disabilities: a review of the literature |
| Vickerman, Philip | 2012 | Including children with special educational needs in physical education: has entitlement and accessibility been realised? |
| Vyas, N. S. and Birchwood, M. and Singh, S. P. | 2014 | Youth services: Meeting the mental health needs of adolescents |
| Waid, Jeffrey and Kelly, Meredith | 2020 | Supporting family engagement with child and adolescent mental health services: A scoping review |
| Woodman-Worrell, A. and Higgins, M. | 2019 | Successful Adoption for Disabled Children or Children with Mental Health Conditions: A Systematic Review |
| **Grey literature** | | |
| Abdulqader, Ebtisam Abdullah M. | 2019 | Designing a Parent-Driven Coaching System for Indirect Speech Therapy |
| About, Families | 2013 | About Families: exploring the evidence on disability |
| Ackers, H. | 2021 | Multi-professional meetings: SENCOs’ reflections on the empty chairs at the table |
| Action For, Children | 2017 | Growing up: supporting young people to a successful adulthood |
| Adams, L. and Tindle, A. and Basran, S. and Dobie, S. and Thomson, D. | 2017 | Experiences of education, health and care plans: A survey of parents and young people |
| Adams, L. and Tindle, A. and Basran, S. and Dobie, S. and Thomson, D. | 2018 | Education, health and care plans: A qualitative investigation into service user experiences of the planning process |
| Adams, L. and Tindle, A. and Basran, S. and Dobie, S. and Thomson, D. and Codina, G. | 2018 | Education, Health and Care plans: a qualitative investigation into service user experiences of the planning process: research report, 85 |
| Adams, Lorna and et, al | 2018 | Education, Health and Care plans: a qualitative investigation into service user experiences of the planning process: research report |
| Adams, Robert | 2011 | Working with children and families: knowledge and contexts for practice |
| Adoption UK | 2018 | Bridging the Gap: Giving adopted children an equal chance in school |
| Ahmed, S. F. and Achermann, J. C. and Arlt, W. and Balen, A. and Conway, G. and Edwards, Z. and Elford, S. and Hughes, I. A. and Izatt, L. and Krone, N. and Miles, H. and O'Toole, S. and Perry, L. and Sanders, C. and Simmonds, M. and Watt, A. and Willis, D. | 2016 | Society for Endocrinology UK guidance on the initial evaluation of an infant or an adolescent with a suspected disorder of sex development (Revised 2015) |
| Ainscow, M. | 2018 | Special needs through school improvement; School improvement through special needs |
| Ainscow, M. and Dyson, A. and Weiner, S. | 2013 | From Exclusion to Inclusion: Ways of Responding in Schools to Students with Special Educational Needs |
| Akbayrak, Kubra | 2019 | An Investigation into Training Programmes of Teachers of Learners with Vision Impairment in Turkey and England |
| Alaszewski, A. and Roughton, H. | 2015 | The development of residential care for children with a mental handicap |
| Alba, Anca | 2014 | The role of emotion regulation in affective disturbance and psychotic-like experiences in adolescent inpatients |
| Aldaba | 2017 | Measuring health vulnerabilities. Technical paper 5 in Children's Commissioner project on vulnerable children |
| Aldrich, Sarah Jane | 2012 | Ready to learn?: a qualitative investigation into what key stage 2 children say contributes to their subjective well-being and facilitates their learning in school, and the development of an instrument to capture change in this domain |
| Aldridge, Jo | 2015 | Participatory research: working with vulnerable groups in research and practice |
| Alessandrini, A. and Loux, V. and Murray, C. and Serra, G. F. and Interaction, A. C. M. Special Interest Group on Computer-Human | 2016 | Designing ReduCat: Audio-augmented paper drawings tangible interface in educational intervention for high-functioning autistic children |
| Alexander, J. and Treasure, J. | 2013 | A Collaborative Approach to Eating Disorders |
| Ali, Farzana | 2019 | Understanding the impact of suicide on families of people who were in receipt of mental health services |
| All Party Parliamentary Group on Autism and National Autistic Society | 2017 | Autism and education in England 2017 |
| Allardyce, S. and Dyer, F. | 2019 | Young people with additional support needs and harmful sexual behaviour: what does evidence tell us about best practice? |
| Allcock, Annelies | 2019 | Disability, poverty and transitional support: ESSS Outline |
| Allcock, Annelies and Smith, Lauren | 2018 | Impact of women specific interventions |
| Ambitious About, Autism and Centre For Research In, Autism and Education | 2017 | Know your normal: young people with autism's experience of mental health |
| Amer, Y. S. and Alenezi, S. and Bashiri, F. A. and Alawami, A. H. and Alhazmi, A. S. and Aladamawi, S. A. and Alnemary, F. and Alqahtani, Y. and Buraik, M. W. and AlSuwailem, S. S. and Akhalifah, S. M. and Augusta de Souza Pinhel, M. and Penner, M. and Elmalky, A. M. | 2022 | AGREEing on Clinical Practice Guidelines for Autism Spectrum Disorders in Children: A Systematic Review and Quality Assessment |
| Anderson, A. and Gerrish, R. and Layton, L. and Morgan, J. and Tilstone, C. and Williams, A. | 2013 | Child development and teaching pupils with special educational needs |
| Andersson, Gunnel and Bons, Tomas and Bringl√∂v, √Ösa and Engwall, Kristina and √ñstberg, Francesca | 2017 | Samverkan f√∂r barn med funktionsneds√§ttning i socialt utsatta familjer |
| Andrea, R. and Darryl, M. and Michael, G. and Seeman, M. V. | 2015 | Parental psychiatric disorder: Distressed parents and their families, third edition |
| Anonymous | 2014 | Improving autism care: the NICE quality standard |
| Anonymous | 2014 | RCN CAMHS expert advises ministers |
| Anonymous | 2014 | RCM surveys find worrying flaws in postnatal mental health care |
| Appleby, K. and Hanson, K. and Bailey, E. and Barr, C. and Proctor, S. | 2019 | The role of the reflective activist in nurturing children's learner identity |
| Apprentices Unit | 2012 | Creating An Inclusive Apprenticeship Offer Report May 2012 |
| Armitano, C. N. and Clapham, E. D. and Lamont, L. S. and Audette, J. G. | 2015 | Benefits of surfing for children with disabilities: a pilot study |
| Armstrong, D. | 2013 | Assessment and patterns of educational provision |
| Armstrong, D. | 2020 | Power and partnership in education: Parents, children and special educational needs |
| Armstrong, D. and Galloway, D. | 2018 | Special educational needs and problem behaviour: making policy in the classroom |
| Arnold, L. and Hoskin, J. | 2021 | Education, Health and Care Plans |
| Ashworth, E. and Kirkby, J. and Bray, L. and Alghrani, A. | 2021 | The Impact of the COVID-19 Pandemic on the Education, Health and Social Care Provision for Children with Special Educational Needs and Disabilities (SEND): The ‚Ä¶ |
| Ashworth, Emma | 2022 | Ask, Listen, Act: Working Together to Inform the Provision of SEND Support for Children after the COVID-19 Pandemic |
| Asquith, Lucy and Barker, Sarah | 2016 | Developing a regional dynamic purchasing system: research report |
| Association of Directors of Children's Services | 2020 | A health care system that works for all children |
| Bailey, A. and Kimber, D. | 2012 | Looking afresh at geography |
| Bailey, F. |  | 10. The need for inter-professional working between teachers, health and social care professionals |
| Bailey, Madeleine | 2018 | THE INDEPENDENT WAY |
| Bailey, S. | 2013 | Exploring ADHD: An ethnography of disorder in early childhood |
| Baim, Clark and et, al | 2018 | Working with complexity: evidence review |
| Baker, Peter and Osgood, Tony | 2019 | Understanding and responding to behaviour that challenges in intellectual disabilities: a handbook for those who provide support |
| Ballam, N. and Perry, B. and Garpelin, A. | 2017 | International Perspectives on the Pedagogies of Educational Transitions |
| Barnes, C. | 2013 | Understanding the social model of disability: Past, present and future |
| Barnes, L. P. and Wright, A. and Brandom, A. M. | 2013 | Learning to teach religious education in the secondary school: A companion to school experience, second edition |
| Barron, Derek T. | 2021 | Independent Review into the Delivery of Forensic Mental Health Services : : what we think should happen |
| BASE project | 2013 | Benchmarking Autism Service Efficacy (BASE) Project: reports |
| Bason, Marie Louise and Woods, Kevin and Squires, Garry | 2012 | The Planning and Implementation of Post-School Transitions for Young People with Special Educational Needs |
| Bates, Keith and Davies, Jill and Burke, Christine and Mattingly, Molly and Foundation for People with Learning, Disabilities | 2014 | Facilitator's Handbook: Raising the Aspirations and Employment Prospects of Young People with Learning Disabilities |
| Bath Spa University | 2021 | National SENCO Workload survey |
| Bauer, Annette and Williams, Gemma | 2015 | Costs and economic consequences of Parent Pioneers, a pilot Mellow Futures programme for mothers with learning difficulties |
| Baum, S. | 2018 | The use of the systemic approach to adults with intellectual disabilities and their families: Historical overview and current research |
| Baum, S. and Walden, S. | 2018 | Setting up and evaluating a family therapy service in a community team for people with intellectual disabilities |
| Beaton, M. C. | 2021 | Hearing their voices: The role of SENCOs in facilitating the participation of all learners |
| Beaton, M. C. and Codina, G. N. and Wharton, J. C. | 2021 | Introduction |
| Bebbington, P. and Kuipers, E. and Fowler, D. | 2013 | Services for people with severe mental disorders in high-income countries: From efficacy to effectiveness |
| Bell, A. and Whitelaw, S. and Mackay, A. and Barber, P. | 2022 | Fostering Resilience in Young People with Additional Support Needs Using a 'Settings' Approach |
| Belmonte, M. K. and Weisblatt, E. J. and Rybicki, A. and Cook, B. and Langensiepen, C. S. and Brown, D. J. and Dhariwal, M. and Saxena-Chandhok, T. and Karanth, P. | 2016 | Can computer-assisted training of prerequisite motor skills help enable communication in people with autism? |
| Bennathan, M. | 2013 | Nurture groups in the 1990s |
| Bennett, Caroline | 2015 | Lifespan personalisation: strategic briefing |
| Bentley, L. | 2017 | What do parents report of the Education, Health and Care needs assessment process? |
| Beresford, Bryony and Rabiee, Parvaneh and Sloper, Patricia | 2007 | Priorities and perceptions of disabled children and young people and their parents regarding outcomes from support services |
| Beveridge, S. | 2012 | Special educational needs in schools, second edition |
| Bhugra, D. and Ventriglio, A. and Kuzman, M. R. and Ikkos, G. and Hermans, M. H. and Falkai, P. and Fiorillo, A. and Musalek, M. and Hoschl, C. and Dales, J. and Beezhold, J. and Rossler, W. and Racetovic, G. and Gaebel, W. | 2015 | EPA guidance on the role and responsibilities of psychiatrists |
| Birch, Katy and et, al | 2019 | Research on the number of children in Wales placed into care from parents with learning disability and the reasons behind their removal |
| Birch, S. and Frederickson, N. | 2015 | Educating children with autism: What use are psychological theory and research? |
| Birrell, Derek and Gray, Ann Marie | 2017 | Delivering social welfare: Governance and service provision in the UK |
| Biswas, M. and Kaiser, M. S. and Mahmud, M. and Al Mamun, S. and Hossain, M. S. and Rahman, M. A. and Mahmud, M. and Kaiser, M. S. and Vassanelli, S. and Dai, Q. and Zhong, N. | 2021 | An XAI Based Autism Detection: The¬†Context Behind the Detection |
| Blackburn, C. and Carpenter, B. and Egerton, J. | 2012 | Educating children and young people with fetal alcohol spectrum disorders: Constructing personalised pathways to learning |
| Blades, Rachel and Day, Laurie and Erskine, Catie | 2016 | National evaluation of the Troubled Families programme: families' experiences and outcomes |
| Blamires, M. and Robertson, C. and Blamires, J. | 2013 | Parent-teacher partnership: Practical approaches to meet special educational needs |
| Blood, Imogen | 2015 | Housing and independent living: synthesis of scoping research for Thomas Pockington Trust |
| Blows, Eliane Sophie and Teoh, Lisa and Paul, Siba Prosad | 2016 | Recognition and management of learning disabilities in early childhood by community practitioners |
| Boddison, Adam | 2020 | The Governance Handbook for SEND and Inclusion: schools that work for all learners |
| Boggis, A. | 2017 | Dis/abled childhoods?: A transdisciplinary approach |
| Bolton, A. and Closs, A. and Norris, C. | 2013 | Researching the education of children with medical conditions: Reflections on two projects |
| Borg, Rachel Mallia | 2018 | Visual support systems: a qualitative evaluation of the support provided to parents of children with autism |
| Boswell, Katie and Curvers, Shona and Simmonds, Lynn and Joy, Iona | 2016 | INVEST IN YOUNG LIVES |
| Bovair, K. | 2018 | A role for the special school |
| Bowen, Marie | 2015 | Home care at time of need |
| Boyle, C. | 2014 | Attitudes towards inclusion scale adjusted (TAISA) |
| Branagan, A. and Parsons, S. | 2021 | Word aware 3: Teaching vocabulary in small groups for ages 6 to 11 |
| Brandon, Marian and Sidebotham, Peter and Bailey, Sue and Belderson, Pippa and Hawley, Carol and Ellis, Catherine and Megson, Matthew | 2012 | New learning from serious case reviews: a two year report for 2009-2011 |
| Bray, N. and Noyes, J. and Edwards, R. T. and Harris, N. | 2014 | Wheelchair interventions, services and provision for disabled children: A mixed-method systematic review and conceptual framework |
| Brennan, Raymond | 2015 | With a little help from my friends: ‘Circle of friends’: supporting children and young people with additional support in Scotland’s mainstream schools |
| Brett, Sally Elizabeth | 2018 | Pupils’ experiences of authentic voice and participatory practices in a special school |
| Bridgeman, J. | 2021 | Transforming family responsibilities: Children with disabilities, parental responsibility and family life |
| Briggs, S. | 2015 | Meeting special educational needs in primary classrooms: Inclusion and how to do it |
| Briggs, S. | 2015 | Meeting special educational needs in secondary classrooms: Inclusion and how to do it, second edition |
| Brooks, C. J. | 2021 | Evaluating the Quality of Education, Health and Care Plans for English Primary School Students with Down Syndrome |
| Brown, J. | 2012 | Professional environment of post-school transitions of young people with additional support needs |
| Bruggink, M. and Meijer, W. and Goei, S. L. | 2014 | Teachers' perceptions of students additional support needs |
| BRUNT, RACHEL | 2018 | Teachers' experiences of working with children with life-limiting conditions in special schools |
| Bryant, B and Gray, PJ. | 2021 | Responsibility-based models of decision-making, funding and commissioning for alternative provision: DfE research report: |
| Bryant, B and Parish, N and Rea, S. | 2016 | Action research into improvement in local children’s services. Final research report |
| Bryant, Ben and Isos, Partnership and et, al | 2022 | Research into how local authorities are ensuring sufficient places and supporting vulnerable children |
| Bryant, Ben and Parish, Natalie and Swords, Beth and Gray, Peter and Kulawik, Karina and Saied-Tessier, Aliya and Partnership, Isos | 2018 | Alternative provision market analysis: Research report |
| Bryant, Ben and Swords, Beth | 2018 | Developing and sustaining an effective local SEND system: A practical guide for councils and partners |
| Burkey, Stefan | 2021 | I want to do well: a literature review of existing research on children and young people’s experiences of COVID-19 |
| Burnford, K. J. and Jones, R. | 2015 | JOINT WORKING FOR LEARNERS WITH SLD/PMLD |
| Burns, Amanda and Curtis, Lesley | 2017 | Unit costs of health and social care 2017 |
| Butler, Michelle and et, al | 2019 | Supporting children and families with complex needs: an exploration of the risks and benefits of voluntary sector service provision as an alternative to statutory services |
| Butler, Vicky and et, al | 2018 | Young people and friendships: what matters to us? |
| Byers, Richard and Oliver, Caroline and McLaughlin, Colleen | 2012 | Everybody here will be bullied: perspectives on the bullying of children and young people with special educational needs and/or disabilities in schools |
| Cadman, J. | 2021 | ‘They've Got It, It's Very Hard for Them to Let It Go': Exploring the Experiences of Professionals when a Young Person's Education, Health and Care Plan (EHCP) Is |
| Camilleri, Nigel | 2015 | A case control and follow up study of 'hard to reach' young people who also suffered from multiple complex mental disorders |
| Campbell, Tammy | 2021 | Special educational needs and disabilities within the English primary school system: what can disproportionalities by season of birth contribute to understanding processes behind attributions and (lack of) provisions? |
| Cardone, D. and Hilton, A. | 2018 | Engaging people with intellectual disabilities in systemic therapy |
| Care, Oxford Brookes University Institute of Public | 2016 | Policy and literature review for comprehensive needs assessment of the life pathway for people with disabilities |
| Care Quality Commission | 2012 | Health care for disabled children and young people : : a review of how the health care needs of disabled children and young people are met by the commissioners and providers of health care in England |
| Care Quality Commission | 2014 | Getting it right for CYP 2014 |
| Care Quality Commission | 2017 | Review of cyp mental health services phase 1 2017 |
| Care Quality Commission | 2018 | Are we listening 2018 |
| Carpenter, B. and Ashdown, R. and Bovair, K. | 2017 | Enabling access: Effective teaching and learning for pupils with learning difficulties: Classic edition |
| Carpenter, B. and Blackburn, C. and Egerton, J. | 2013 | Fetal alcohol spectrum disorders: Interdisciplinary perspectives |
| Carpenter, B. and Egerton, J. and Cockbill, B. and Bloom, T. and Fotheringham, J. and Rawson, H. and Thistlethwaite, J. | 2015 | Engaging learners with complex learning difficulties and disabilities: A resource book for teachers and teaching assistants |
| Carrigan, Neil | 2014 | Doctorate in clinical psychology : research portfolio |
| Castro, S. and Palikara, O. | 2017 | The education health and care planning process in England |
| Castro, S. and Palikara, O. | 2017 | An emerging approach for education and care: Implementing a worldwide classification of functioning and disability |
| Chadwick, J. | 2014 | A realistic evaluation of the use of group consultation to deliver educational psychology services |
| Change and Patient Experience, Network | 2015 | Hidden voices of maternity: parents with learning disabilities speak out |
| Cheminais, R. | 2014 | Fulfilling wider professional development responsibilities |
| Children's Commissioner | 2022 | Voices of England's Missing Children: The findings of the Children's Commissioner's Attendance Audit |
| Children's Commissioner | 2021 | The Big Ask: The Big Answer |
| Children's Commissioner for Wales | 2018 | 'Don't hold back': transitions to adulthood for young people with learning disabilities |
| Children'S Commissioner For, England | 2019 | Exclusions: children excluded from mainstream schools |
| Children'S Commissioner For, England | 2019 | Far less than they deserve: children with learning disabilities or autism living in mental health hospitals |
| Children'S Rights Alliance For, England | 2014 | State of children's rights in England: review of Government action on United Nations' recommendations for strengthening children's rights in the UK: 2014 |
| Children'S, Society and et, al | 2020 | Pressures on children's and young people's services: a deep dive |
| Childs-Fegredo, Jasmine | 2016 | Client experience of receiving adapted dialectical behaviour therapy (dbt) and its perceived role in the process of change |
| Chilton, Edward and Squires, Garry and Woods, Kevin | 2013 | Identifying the Role of the Special School Learning Support Assistant: A Case Study Evaluation |
| Chilvers, P. | 2016 | Reducing distant SEND placements: increasing regional sufficiency |
| Clements, Luke and Aiello, Ana Laura | 2021 | Institutionalising parent carer blame |
| Clements, Luke and et, al | 2017 | Disabled children and the cost of effectiveness of home adaptations and disabled facilities grants: a small scale pilot |
| Clements, Luke and McCormack, Sorcha | 2018 | The accessibility of Disabled Facilities Grant application forms in England |
| Cline, T. | 2018 | The Assessment of Special Educational Needs: International Perspective |
| Clough, B. and Herring, J. | 2021 | Disability, care and family law |
| Cochrane, H. | 2016 | Exploring perceptions and experiences of the education, health and care process |
| Cocker, Christine Margaret | 2019 | Social workers' views on the use of the Strengths and Difficulties Questionnaire (SDQ) with looked after children |
| Codina, G. N. and Wharton, J. C. | 2021 | The language of SEND: Implications for the SENCO |
| Cole, Michaela Jane | 2012 | Promoting emotional well being and inclusion for children identified with emotional and behavioural difficulties in mainstream primary schools: an evaluation of a psychotherapeutic approach (thrive) |
| Cole, T. and Daniels, H. and Visser, J. | 2012 | The Routledge international companion to emotional and behavioural difficulties |
| Coleman, Alyson | 2014 | A study into the experience of dramatherapists working with children with life-limiting or life-threatening conditions |
| Coles, B. | 2017 | Personalisation policy and parents: The formalisation of family care for adult children with learning disabilities in England |
| Colville, Tracey | 2012 | Cultural-historical activity theory and additional support needs decision-making processes in a Scottish local authority: partnership working as a learning zone intervention |
| Conlon, Lynda | 2014 | Transition planning for young people with learning disabilities in Great Britain |
| Conn, C. | 2016 | Play and friendship in inclusive autism education: Supporting learning and development |
| Conn, C. | 2016 | Observation, assessment and planning in inclusive autism education: Supporting learning and development |
| Connor, D. | 2018 | Supporting children with autism in the primary classroom: A practical approach |
| Constance, Lyndsey J. | 2020 | Social Care Workers' Experiences of Assessing Parents with Learning Disabilities : an Interpretative Phenomenological Analysis Study Based in the Northwest of England |
| Contact and et, al | 2020 | Transitions Project: survey of parent carers’ experiences and concerns around the transition from children's to adult's services |
| Cook, R. E. and Klein, M. D. and Chen, D. | 2020 | Adapting early childhood curricula for children with disabilities and special needs |
| Cook, W. | 2014 | Modelling the Effects of the Inclusion of Pupils With Additional Support Needs (ASN) on Attainment and Attendance in Primary School |
| Coombe, Stephanie | 2019 | The Impact of Using Resilience-based Practice on Outcomes for Pupils with Complex Needs |
| Cooper, H. | 2017 | Making policy for whom? The significance of the psychoanalytic medical humanities for policy and practice that affects the lives of disabled children |
| Cooper, Pauline | 2019 | An Illuminative Evaluation into How a Post-16 Setting Accesses and Uses the Voices of Learners with Ehcps to Inform Their Annual Review |
| Coopergibson, Research | 2022 | Evaluation of the Assistive Technology Training Pilot: research report |
| Coopergibson, Research and Disability Rights, U. K. | 2013 | Supported internship trial for 16 to 24 year old learners with learning difficulties and/or disabilities: an evaluation: research report |
| Copps, J., Heady, L. | 2007 | What price an ordinary life? The financial costs and benefits of supporting disabled children and their families |
| Corcoran, T. and White, J. and Whitburn, B. | 2015 | Disability studies: Educating for inclusion |
| Corcoran, J. | 2016 | The lived experience of people with bipolar disorder |
| Cordis Bright Consulting | 2018 | Dynamic Wrexham. Evaluation of A Dynamic Future: final report. |
| Cornick, Peter and Morgan, Hannah and Howe, Shane and Natcen Social, Research | 2018 | Children's services omnibus: wave 4 research report |
| Cornwall, J. and Graham-Matheson, L. | 2012 | Leading on Inclusion: Dilemmas, debates and new perspectives |
| Coulter, S. and Kynman, L. and Morling, E. and Grayson, R. and Wing, J. | 2015 | Supporting children with dyspraxia and motor co-ordination difficulties, second edition |
| Council For Disabled, Children | 2012 | The VIPER project: what we found |
| Council For Disabled, Children | 2012 | Summary of VIPER recommendations |
| Council For Disabled, Children | 2012 | The VIPER project: how we did the qualitative research |
| Council For Disabled, Children | 2018 | 'Realistic positivity': understanding the additional needs of young children placed for adoption, and supporting families when needs are unexpected: practice briefing |
| Council For Disabled, Children | 2012 | The VIPER project: what we found from the survey |
| Council For Disabled, Children and Hamblin, Emily | 2018 | 'Realistic positivity': understanding the additional needs of young children placed for adoption, and supporting families when needs are unexpected |
| Council, O. C. | 2020 | Agenda for Education Scrutiny Committee on Wednesday, 23 September 2020, 1.00 pm |
| Cowen, A. | 2010 | Personalised Transition. Innovations in health, education and support |
| Cowne, E. and Frankl, C. and Gerschel, L. | 2015 | The SENCO handbook: Leading and managing a whole school approach: Sixth edition |
| Craston, M. and Thom, G. and Spivack, R. | 2013 | Evaluation of the SEND pathfinder programme Process and implementation Research Brief |
| Craston, Meera and Carr, Christopher and Clarke, Charlotte | 2013 | Evaluation of the green paper support contracts : : research report |
| Craston, Meera and et, al | 2013 | Evaluation of the SEND pathfinder programme: impact research brief |
| Craston, Meera and et, al | 2013 | Impact evaluation of the SEND Pathfinder Programme: research report |
| Craston, Meera and et, al | 2014 | Evaluation of the Special Educational Needs and Disability Pathfinder Programme: understanding the comparative costs of delivering the EHC planning and SEN statementing processes for newcomers to the SEN system: research report |
| Craston, Meera and et, al | 2014 | Evaluation of the Special Educational Needs and Disability Pathfinder Programme: thematic report: collaborative working with health: research report |
| Craston, Meera and et, al | 2014 | Special educational needs and disability pathfinder programme evaluation: summary of interim impact findings: research report |
| Croll, P. and Moses, D. | 2012 | One in Five: the assessment and incidence of special educational needs |
| Crossley, N. and Hewitt, D. | 2021 | Inclusion: A principled guide for school leaders |
| Crowe, Dan and Gash, Tom and Kippin, Henry | 2014 | Beyond big contracts: commissioning public services for better outcomes |
| Cullen, Mairi Ann and et, al | 2017 | Review of arrangements for disagreement resolution (SEND): research report |
| Cullen, Mairi Ann and Lindsay, Geoff and Hastings, Richard and Denne, Louise and Stanford, Catherine and Elahi, Lorena BeqiraqFarah and Gemegah, Eli and Kander, Nikita HaydenIn√®s and Lykomitrou, Foteini and Zander, Julia | 2020 | Special Educational Needs in Mainstream Schools: Evidence Review |
| Curran, H and Moloney, H and Heavey, A and Boddison, A | 2018 | It's about time: the impact of SENCO workload on the professional and the school |
| Curran, H. | 2019 | How to Be a brilliant SENCO: Practical strategies for developing and leading inclusive provision |
| Curran, H. | 2021 | Developing SENCO resilience: Understanding and meeting the challenge of the role |
| Curran, H. | 2015 | SEND reforms 2014 and the narrative of the SENCO: early impact on children and young people with SEND, the SENCO and the school |
| Curran, Helen | 2020 | Identifying special educational needs in the early years: perspectives from special educational needs coordinators |
| Dallimore, Sian | 2015 | An investigation of perceptions of ocd, caregiver burden, distress and accommodation |
| Dance, Cherilyn and Allnock, Debbie | 2013 | Building capacity and bridging the gaps: Strand 1: Social care practice with older people, people with learning disabilities and physically disabled people who use alcohol and other drugs: final report |
| Daniels, H. and Porter, J. | 2012 | Learning needs and difficulties among children of primary school age: Definition, identification, provision and issues |
| Darby, Simon and Stockwood, Gemma | 2012 | In it together: in practice |
| Davidson, Gavin and Bunting, Lisa and Webb, Mary Anne | 2012 | Families experiencing multiple adversities: a review of the international literature |
| Davies, Nathan | 2013 | The Children's Low Vision Project in Wales: Evaluation of a multi-disciplinary training programme & the provision of eye care services in special schools in Wales |
| Davis, B. | 2012 | Choice and achievement: Inclusion in Barnet |
| Davis, L. | 2012 | Protecting children's right to health and reducing barriers |
| Davis, M. E. A. | 2014 | Exploring transition for young people with special needs |
| Davis, T. and Pierson, D. and Bevan, A. and Barbancho, I. and Tardon, L. J. and Peinado, A. and Barbancho, A. M. and Applied Sciences, an Open Access Journal by Mdpi and Fast and Universidad de, Malaga and Vicerratorado de Investigacion y, Transferencia and et al. and Andallucia, Tech | 2019 | Increasing access to music in SEn settings |
| Deacutis, Molly | 2012 | What does it mean to experience paediatric depression?: the ethics of mental health diagnosis and treatment in children and adolescents |
| DeMarco, Noelle and DeMarco, Noelle | 2021 | Better Together: A Webinar to Promote Family-School Partnerships in Special Education Evaluations |
| Dent, Emma | 2015 | Talk it out |
| Department for Education | 2015 | Special educational needs and disability: supporting local and national accountability |
| Department for Education | 2019 | Children in need of help and protection: data and analysis |
| Department for Education | 2014 | The SEN and Disability Pathfinder programme evaluation : : progress and indicative costs of the reforms : research report |
| Department for Education | 2012 | Better Communication Research Programme Improving Provision SLCN 2012 |
| Department for Education | 2012 | Exploring interventions CYP with SLCN 2012 |
| Department for Education | 2012 | Perspectives of children who have SLCN 2012 |
| Department for Education | 2012 | Preferred outcomes SLCN children 2012 |
| Department for Education | 2012 | Profiles of need and provision language impairments ASD 2012 |
| Department for Education | 2012 | SLCN ASD changing needs 2012 |
| Department for Education | 2012 | Understanding SLCN profiles of need and provision 2012 |
| Department for Education | 2012 | value for money SLCN 2012 |
| Department for Education | 2012 | What works CYP SLCN interventions 2012 |
| Department for Education | 2015 | 16 to 19 funding for students with additional needs 2015 |
| Department for Education | 2017 | DfE SEN Support Case studies 2017 |
| Department for Education | 2017 | DfE SEN Support Rapid Evidence Assessment 2017 |
| Department for Education | 2017 | DfE SEN Support Survey Report 2017 |
| Department for Education | 2012 | Evaluation extended individual budget pilot 2012 |
| Department for Education | 2019 | Evaluation of disabled students allowances 2019 |
| Department for Education | 2013 | Leadership of special schools issues and challenges 2013 |
| Department for Education | 2018 | Work experience report 2018 |
| Department for Education | 2017 | Good intentions good enough 2017 |
| Department for Education | 2017 | Inclusive Teaching and Learning in Higher Education as a route to excellence 2017 |
| Department for Education and Department of Health | 2015 | Special educational needs and disability code of practice: 0 to 25 years. |
| Department for Education and Department of Health | 2014 | 0 to 25 SEND code of practice : : a guide for health professionals : advice for clinical commissioning groups, health professionals and local authorities |
| Department for Education and Department of Health | 2014 | Implementing a new 0 to 25 special needs system : : LAs and partners : further government advice for local authorities and health partners |
| Department for Education and Department of Health and Social Care | 2022 | SEND Review: Right support, right place, right time: Government consultation on the SEND and alternative provision system in England [Green Paper] |
| Department of Health | 2013 | Improving Children and Young People’s Health Outcomes: a system wide response |
| Department of Health | 2014 | Children with special educational and complex needs : : guidance for health and wellbeing boards |
| Dickson, Sarah J. | 2014 | The psychopathy checklist youth version (pcl:yv): an investigation into its inter-rater reliability |
| Diggins, Marie | 2013 | What works: researching success in parental mental health and child welfare work |
| Dillenburger, K. and McKerr, L. and Jordan, J. A. | 2016 | BASE project (vol.4): qualitative data analysis |
| Dinwoodie, R. and Greenhill, B. | 2020 | Developing a psychological understanding of the lived experiences of young lesbian, gay, bisexual and/or trans (LGBT+) people labelled with intellectual disability (ID) |
| Dowling, Sandra and Kelly, Berni and Winter, Karen | 2012 | Disabled children and young people who are looked after: a literature review |
| Drennan, V. | 2014 | Chapter 9: Adults with extra needs: People with learning disabilities |
| Driver Youth Trust | 2015 | Joining the dots: Have recent reforms worked for those with SEND? |
| Driver Youth Trust | 2013 | The fish in the tree: Why we are failing children with dyslexia |
| Dryer, R. and Kiernan, M. J. and Tyson, G. A. | 2012 | Do professions differ in their beliefs about the causes and treatment of attention-deficit hyperactivity disorder? |
| Dunhill, Zo√´ M | 2010 | Children and Young People with Disability: Management and Support |
| Dunson, W. E. | 2021 | School success for kids with Dyslexia and other reading difficulties |
| Durcan, Graham and et, al | 2014 | The Bradley report five years on: an independent review of progress to date and priorities for further development |
| Eccleston, Sally | 2016 | "we're one side of the wall and they're the other": an interpretative phenomenological analysis study exploring parents' and young people's experiences of family engagement during the education, health and care needs assessment process |
| Education, Department for | 2012 | Draft Legislation on Reform of Provision for Children and Young People with Special Educational Needs |
| Education, Great Britain Department for | 2019 | State of the nation 2019: children and young people's wellbeing. Research report |
| Education, Great Britain Department for | 2022 | Guidance on our intervention work with local authorities |
| Education, Great Britain Department for | 2022 | Sustainable high needs systems: case studies |
| Education, Great Britain Department for and Justice, Great Britain Ministry of | 2017 | Special educational needs and disabilities: disagreement resolution arrangements in England. Government report on the outcome of the review conducted by the Centre for Educational Development, Appraisal and Research (CEDAR) |
| Education, Scotland | 2015 | How Good Is Our School? 4th Edition |
| Education, Scotland | 2016 | How Good Is Our College? First Edition |
| Edwards, T. and Beaton, M. C. | 2021 | The SENCO role: Leading on assessment |
| Edyburn, Dave L. | 2020 | Assistive technology: stakeholder report: researchers |
| Edyburn, Dave L. | 2020 | Rapid literature review on assistive technology in education: research report |
| Efstatopoulou, Lida | 2019 | The Potential of New Knowledge for Public Mental Healthcare Organisations : the Case of Absorptive Capacity in Child and Adolescent Mental Health Services |
| Ekins, A. | 2015 | Changing Face of Special Educational Needs |
| Ekins, A. and Robinson, S. and Durrant, I. and Summers, K. | 2017 | Educating children with life-limiting conditions: A practical handbook for teachers and school-based staff |
| Eklund, Hanna | 2013 | Study of needs and service use among young people with attention deficit hyperactivity disorder at transition from adolescence to young adulthood |
| El-Kouedi, Mona Akil | 2013 | Contentious politics and the making of Egyptian public spaces |
| Ellis, S. and Tod, J. | 2018 | Behaviour for learning: Promoting positive relationships in the classroom: Second edition |
| English-Peach, Charles Mark and Sealey, Clive | 2021 | Improving Transitions for Independence to Adulthood for Care Leavers |
| et, al and Taket, Ann | 2013 | Practising social inclusion |
| European Foundation For The Improvement Of, Living and Working, Conditions | 2012 | Active inclusion of young people with disabilities or health problems |
| Ewing, C. | 2017 | 'Help bridge the alarming gap between rich and poor' |
| Family, Action | 2012 | The troubled families programme: what's needed to deliver outcomes on school attendance and exclusion |
| Family, Fund and University Of, Portsmouth | 2015 | Do siblings matter too? A summary of a research project investigating what is it like to be a sibling of a child with a disability |
| Farrell, M. | 2013 | Educating special children: An introduction to provision for pupils with disabilities and disorders, second edition |
| Ferriday, G. | 2019 | An Exploration of the Factors that Impact Upon the Inclusion of Pupils with Additional Support Needs in Mainstream Secondary Education: The Staff's Perspective |
| Fitzgerald, Damien and Kay, Janet | 2016 | Understanding early years policy |
| Fitzroy | 2015 | Who will care after I'm gone? An insight into the pressures facing parents of people with learning disabilities |
| Foster, R. and Barber, L. | 2021 | Physical education for young people with disabilities: A handbook of practical ideas created by practitioners for practitioners |
| Fox, G. | 2012 | A handbook for special needs assistants: working in partnership with teachers |
| Franklin, Anita, Toft, A., Hernon, J., Greenaway-Clarke, J., and Goff, S. | 2022 | UK social work practice in safeguarding disabled children and young people: a qualitative systematic review |
| Franklin, Anita and Bradley, Louise and Brady, Geraldine | 2019 | Effectiveness of services for sexually abused children and young people. Report 3: perspectives of service users with learning difficulties or experience of care |
| Franklin, Anita and Raws, Phil and Smeaton, Emilie | 2015 | Unprotected, overprotected: meeting the needs of young people with learning disabilities who experience, or are at risk of, sexual exploitation |
| Franklin, Anita and Toft, Alex and Goff, Sarah | 2019 | Parents' and carers' views on how we can work together to prevent the sexual abuse of disabled children |
| Franklin, G. B. | 2012 | Special educational needs issues and ICT |
| Fraser, Mitchell | 2012 | Self-directed support and disabled young people in transition (part 1): Managing Community Care |
| Frederickson, N. and Cline, T. | 2015 | EBOOK: Special Educational Needs, Inclusion and Diversity |
| French, Blandine | 2021 | Awareness of Adhd in Primary Care |
| Friswell, J. | 2014 | Supporting students with additional needs in Scotland |
| Galloway, D. | 2018 | Schools, pupils and special educational needs |
| Galloway, D. M. and Armstrong, D. and Tomlinson, S. | 2013 | The assessment of special educational needs: Whose problem? |
| Galton, Maurice and MacBeath, John | 2015 | Inclusion: Statements of intent |
| Galvani, Sarah | 2012 | Supporting people with alcohol and drug problems: making a difference |
| Ganashree, A., Akromaite, A., Panayotov, B., O'Neal, C., Waziri, D., Kalonzo, D., et al. | 2017 | Disabled Children and the Cost Effectiveness of Home Adaptations & Disabled Facilities Grants: a Small Scale Pilot Study |
| Gardiner, E. and Wong, V. and Miller, A. R. | 2022 | Proceedings of the BC Summit on Navigation for Children and Youth with Neurodevelopmental Differences, Disabilities, and Special Needs |
| Gardner, John | 2014 | A sociology of medical innovation: deep brain stimulation and the treatment of children with dystonia |
| Gascoigne, E. | 2014 | Working with Parents: As partners in special educational needs |
| Gates, B. | 2014 | The nature of learning disabilities and their relationship to learning disability nursing |
| Gauld, N. and Odena, O. and Beck, A. and Green, J. and Huxtable, R. | 2015 | Education as if Research Mattered |
| Gersch, I. S. and Gersch, B. | 2018 | Supporting advocacy and self-advocacy: The role of the allied professions |
| Giffen, Alicia Marion | 2017 | Exploring the educational experiences of children and young people with non-syndromic cleft lip and or palate in the west of Scotland |
| Gill, Kiran and Quilter-Pinner, Harry and Swift, Danny | 2017 | Making the difference: breaking the link between school exclusion and social exclusion |
| Gillie, Sarah and Hancock, Roger | 2022 | Family Transitions and Home Education: Circumstances, Processes and Practices |
| Giulio, P. Di and Philipov, D. and Jaschinski, I. | 2014 | Families with disabled children in different European countries |
| Glasper, A. and Evans, K. | 2014 | Improving services for disabled children and their families |
| Gleeson, H. and McDonagh, J. E. | 2019 | Long-term care management of young people: Substance use and misuse by young people who have long-term conditions |
| Glendinning, C. | 2015 | Community Care in England |
| Goei, Sui Lin and Norwich, Brahm and Dudley, Peter | 2021 | Lesson Study for inclusive teaching in various settings |
| Goliath, Charlene | 2021 | An exploration of school strategies enabling teachers in mainstream schools to support learners with Asperger’s Syndrome |
| Gooch, D. and Vasalou, A. and Benton, L. | 2016 | Exploring the use of a gamification platform to support students with dyslexia |
| Gore, Helen | 2016 | 'Working together... it doesn't go far enough actually for what the relationship becomes'-An IPA study exploring the experiences of primary school SENCOs working with parents/carers through the EHCP process |
| Government, Welsh | 2018 | Learning disability improving lives programme |
| Graham-Matheson, L. | 2012 | Introduction: Leading on inclusion |
| Graham-Matheson, L. | 2014 | Essential theory for primary teachers: An introduction for busy trainees |
| Graham, Emma | 2019 | A study exploring parents' experiences of their young person's transition from specialist settings to post 19 provision |
| Graham, Julia | 2012 | Children with disabilities and their families: team working and the role of the key worker |
| Grants, P. |  | Key policy and research pack |
| Gray, A. | 2016 | English as an additional language (EAL), special educational needs and dyslexia: The role of the 21st century SENCo |
| Gray, Peter and et, al | 2022 | High needs budgets: effective management in local authorities: research report |
| Great Britain. Department for Levelling Up, Housing and Communities | 2022 | Levelling up for families: annual report of the Supporting Families programme 2021-2022 |
| Green, H. and Edwards, B. | 2021 | Working in partnership with parents |
| Griffith, Eleri and Jackson, Mike | 2021 | Experiences and Perceptions of Frequently Overlooked Groups in Mental Health Contexts |
| Griffiths, Eve | 2014 | 'the best of both worlds' or 'a compromise policy'?: co-location as a form of educational placement for pupils with special educational needs |
| Gross, J. and White, A. | 2012 | Special educational needs and school improvement: practical strategies for raising standards |
| Gurney, P. W. | 2018 | Self-esteem in children with special educational needs |
| Hafidh, R. and Sharif, M. S. and Alsallal, M. and Miraz, M. H. and Excell, P. S. and Ware, A. and Soomro, S. and Ali, M. | 2019 | Smart holistic model for children and youth with special educational needs and disabilities |
| Hall, D. | 2015 | The ICT handbook for primary teachers: A guide for students and professionals: Second edition |
| Halliwell, M. | 2012 | Supporting children with special educational needs: A guide for assistants in schools and pre-schools |
| Hallworth, Deborah Jane | 2021 | Challenging behaviour in primary schools: How is the problem constructed by professionals in North West England? |
| Halpin, Julia Gwendoline | 2014 | The role of the nurse in preschool autism assessment |
| Hankin, L. | 2021 | Ensuring access to Intensive Interaction through Education, Health and Care Plans |
| Hanko, G. | 2018 | Special needs in ordinary classrooms: From staff support to staff development |
| Hannah, B. | 2019 | Puberty as a life transition: understanding and supporting young people with additional support needs |
| Hannon, L. and Clift, J. | 2013 | General Hospital Care for People with Learning Disabilities |
| Harris, N. and Davidge, G. | 2018 | Autonomy, Rights and Children with Special Needs: A New Paradigm |
| Harry, Melissa Lindley | 2016 | The effectiveness of participant-directed home and community-based services for young adults with long-term care disabilities: Analysis of a randomized control trial |
| Harwood, V. and Allan, J. | 2014 | Psychopathology at school: Theorizing mental disorders in education |
| Hassan, D. and Dowling, S. and McConkey, R. | 2014 | Sport, coaching and intellectual disability |
| Hayes, D. | 2017 | The key to improving EHC plans |
| Hayes, J. | 2020 | Drawing a Line in the Sand : Autism Diagnosis as Social Process |
| Hayes, Tracy | 2018 | Making sense of nature: a creative exploration of young people's relationship with the natural environment |
| Heasley, Jonathan | 2017 | Young people's views concerning their voice in education, health and care planning meetings: a participatory q-study |
| Heer, K. and Larkin, M. and Burchess, I. and Rose, J. | 2012 | The cultural context of care-giving: Qualitative accounts from South Asian parents who care for a child with intellectual disabilities in the UK |
| Heer, Kuljit | 2012 | The cultural context of care-giving: a phenomenological exploration of the experiences of south Asian carers caring for children with intellectual/developmental disabilities |
| Hemmings, C. and Bouras, N. | 2016 | Psychiatric and Behavioral Disorders in Intellectual and Developmental Disabilities: Third Edition |
| Henderson, Peter S. | 2012 | Tracking the progression of the well-being of children and young people deemed to have behavioural, emotional and social difficulties (BESD) |
| Hernon, Jane | 2018 | The social worlds of disabled young people and their experience of child protection enquiries and their aftermath |
| Hewett, Rachel and Douglas, Graeme and Keil, Sue | 2016 | Transition to adulthood. Final summary report for project 'Longitudinal study of transitions experiences of blind and partially sighted young people (Phase 2)' |
| Heydon, Anna | 2013 | Reviews. Making collaborative practice work: a model for teachers and SLTs |
| Hickey, I. and Robson, D. and Flanagan, M. | 2012 | Analysis of feedback from schools taking part in the Leonardo Effect pilot |
| Hill, Kathryn and Craston, Meera and Daff, Kerry and Thom, Graham | 2014 | Special Educational Needs and Disability Pathfinder Programme Evaluation: Thematic report: Key working and workforce development |
| Hillier, Meg | 2020 | Support for children with special educational needs and disabilities : : first report of session 2019‚Äì21 : report, together with formal minutes relating to the report |
| Hinchcliffe, V. | 2014 | English |
| Hinchcliffe, V. | 2018 | A bermuda triangle for training: The case of severe learning difficulties |
| Hj√∂rne, E. and Van Der Aalsvoort, G. and De Abreu, G. | 2012 | Learning, social interaction and diversity - exploring identities in school practices |
| HM Government | 2022 | SEND review : : right support, right place, right time : government consultation on the SEND and alternative provision system in England |
| HM Government | 2014 | SEND pathfinders: Reports on the independent evaluation of the SEND pathfinders programme which tested reforms proposed in the SEND green paper. |
| Hodge, N. and Runswick-Cole, K. | 2017 | ‘you say‚ i hear’: Epistemic gaps in practitioner-parent/carer talk |
| Holliman, A. J. | 2013 | The Routledge international companion to educational psychology |
| Holloway, A. | 2014 | Delivering the mathematics curriculum through technology-enhanced learning |
| Holt, Deborah Anne | 2019 | Primary School Teacher's Responsibility to Promote Positive Mental Health |
| Hopkins, Nick and Halliday, John and Grimes, Alistair | 2015 | Housing and independent living: needs and aspirations of younger adults (aged 16-44) with sight loss: a scoping study for Thomas Pocklington Trust |
| House of Commons | 2021 | Unequal impact? : : coronavirus, disability and access to services : interim report on temporary provisions in the Coronavirus Act : government response to the Committee’s first report : second special report of session 2019-20 |
| House of Commons Committee of Public Accounts | 2020 | Support for children with special needs |
| House Of Commons Education Committee | 2019 | Special educational needs and disabilities |
| House Of Commons Education Committee | 2012 | Pre-legislative scrutiny: Special Educational Needs. Education Committee - Sixth Report |
| House of Commons Library | 2020 | Special Educational Needs: support in England. Briefing Paper Number 07020. |
| Hudson-Sharp, Nathan and et, al | 2018 | The impact of welfare reform and welfare-to-work programmes: an evidence review |
| Hughes, L. | 2021 | Medical conditions |
| Hughes, Nathan and Chitsabesan, Prathiba | 2015 | Supporting young people with neurodevelopmental impairment |
| Humber, Lee Anderson | 2012 | Theorising work: investigating the employment of people with learning difficulties |
| Hunt, Rachel | 2020 | ‘We didn’t want her to drown, throw her in the deep end and fight her way out’: an exploration of parental experience of choosing a special school placement for children with special educational needs and disability. An Interpretative Phenomenological Analysis |
| Hunter, Jack | 2019 | Plans that work: employment outcomes for people with learning disabilities |
| Huntley, Z. M. | 2013 | Aspirations and outcomes for people with autism spectrum disorders in emerging adulthood |
| Hussain, Jahangir | 2013 | The perspectives of key stakeholders involved in the process of identification, assessment, diagnosis and accessing of support for children with autism spectrum disorder in families with lower socioeconomic status in one outer London local authority |
| Hutchins, J. and Kaur, K. and Marks, P. | 2012 | JOINT STRATEGIC NEEDS ASSESSMENT |
| Hutchinson, Jo | 2021 | Identifying pupils with special educational needs and disabilities |
| IFF Research | 2020 | The School Snapshot Survey: Summer 2019. 3. Support for Pupils. Research report |
| Iff, Research | 2021 | Special educational needs (SEN) support: findings from a qualitative study |
| Iff, Research and Belmana | 2021 | Evaluation of the national trial extension of Special Educational Needs and Disability (SEND) Tribunal powers |
| Ionides, Maria | 2016 | Values and beliefs held about parenting and education by school staff and parents of pupils with special educational needs in the context of home-school collaboration |
| Ivory, Mark | 2015 | Voice of the child: meaningful engagement with children and young people: evidence review |
| Jayes, Mark | 2017 | Improving mental capacity assessment : iterative, user-centred design of a toolkit and examination of its use in clinical practice |
| Jelly, M. and Fuller, A. and Byers, R. | 2013 | Involving pupils in practice: Promoting partnerships with pupils with special educational needs |
| Jindal-Snape, Divya | 2016 | A-Z of Transitions |
| Jones, Christine and Taylor, Julie | 2018 | Disclosure of abuse by disabled children |
| Jones, Christine and Taylor, Julie | 2018 | Disclosure of abuse by disabled children: An emergent international model of telling, listening and acting |
| Jones, Daphne and Squires, Garry | 2013 | Understanding Decision-Making Relating to Out-of-Authority Placements for Pupils With Autistic Spectrum Conditions |
| Jones, E. and Davies, E. | 2018 | Exploring the funding and support for apprentices with additional support needs |
| Jones, Ian | 2016 | De-escalating interventions for troubled adolescents |
| Kaehne, Alex and et, al | 2018 | Rapid review: transition for young people with learning disabilities in housing, social care, and health care, education/training, and employment |
| Kane, J. | 2013 | Social class gender and exclusion from school |
| Keating, Ann | 2015 | Living life to the fullest |
| Keen, Deb and Rodger, Sylvia | 2012 | Working with parents of a newly diagnosed child with an autism spectrum disorder: a guide for professionals |
| Kelly, Berni and Dowling, Sandra and Winter, Karen | 2016 | Disabled children and young people in out-of-home-care: summary report |
| Kelly, Berni and Dowling, Sandra and Winter, Karen | 2016 | Addressing the needs and experiences of disabled children and young people in out-of-home care |
| Kelman, E. | 2013 | Reforms better access to health |
| Kelly, Grace and Kelly, Bernie and Macdonald, Geraldine | 2016 | Improving the well-being of disabled young people |
| Kerr, M. and Linehan, C. and Thompson, R. and Mula, M. and Gil-Nagal, A. and Zuberi, S. M. and Glynn, M. | 2014 | A White Paper on the medical and social needs of people with epilepsy and intellectual disability: the Task Force on Intellectual Disabilities and Epilepsy of the International League Against Epilepsy |
| Kershner, R. | 2014 | What do classroom teachers need to know about meeting special educational needs |
| Kersner, M. and Wright, J. A. | 2013 | Speech and language therapy: The decision-making process when working with children |
| Khaki, Zahra | 2021 | Thesis Submitted in Partial Fulfilment of the Degree of Doctor of Clinical Psychology (DClinPsy) |
| King, Sadie and Gieve, Matt and Iacopini, Giorgia and Hahne, Anna Sophie and Stradling, Heather and The Tavistock Institute of Human Relations | 2017 | The Evaluation of the Adoption Support Fund |
| Kingswood, M. | 2014 | Being organisationally changed: exploring the NHS professional staff the impact of organisational change |
| Knapp, Martin and et, al | 2019 | Advocacy for parents with learning disabilities. A small-scale social care intervention: economic evidence |
| Knowles, G. | 2017 | Supporting inclusive practice and ensuring opportunity is equal for all: Third edition |
| Kramer-Roy, Debbie | 2012 | Exploring the support needs of Pakistani families with disabled children: a participatory action research study |
| Król-Gierat, W. | 2021 | Learning preferences of SEN children in an inclusive English classroom |
| Kryszewska, H. | 2017 | Teaching students with special needs in inclusive classrooms special educational needs |
| Kuegel, C. | 2014 | Special educational needs and technology |
| Kwan-Tat, Natasha | 2018 | Social representations and special educational needs: the representations of SEN among Sri Lankan, Tamil families and educational professionals |
| Kwiatkowska, G. | 2016 | One Page Profiles and EHC plans the Wiki way: Using RIX Wikis to implement EHC plans |
| Lacey, P. and Ashdown, R. and Jones, P. and Lawson, H. and Pipe, M. | 2015 | The Routledge companion to severe, profound and multiple learning difficulties |
| Laird, Madeleine Mackay and Bond, Caroline | 2012 | Parental Perceptions of a Pre School Diagnostic Pathway for Autism |
| Lamb, B. | 2021 | The future of SEND legislation in England: What next? |
| Lancaster, Becki | 2012 | Social work services for disabled children and young people and their families: assessment and eligibility: full report |
| Law, Constance E. and Woods, Kevin | 2018 | An Exploration of Educational Psychologists' (EP) Practices for Behaviour Concerns |
| Law, Mary | 2008 | Multi-Agency Care for Children with Complex Needs |
| Lawrence, Hannah and Bellew-Coram, Rebecca | 2017 | Innovation in social care assessments for disabled children: research report |
| Lawton, Susan Patricia | 2013 | An action research enquiry in one unitary local authority about the experiences of support available to parents and mainstream secondary schools for children with a diagnosis of autism |
| Lee, P. and Cook, S. and Mee, C. | 2017 | The power of volunteers |
| Lehane, Maria | 2015 | No frills: the governance of children and family services |
| Lehmann, Katrin | 2020 | Gender Dysphoria : Prevalence, Pathways and Experiences of People with Autism Traits |
| Lemmi, Valentina and Knapp, Martin and Ragan, Ian | 2016 | The autism dividend: reaping the rewards of better investment |
| Lenehan, C. |  | The voice of the disabled children's sector |
| Lenehan, Dame Christine | 2017 | These are OUR children |
| Lepanjuuri, Katriina and Cornick, Peter | 2017 | Children's services omnibus: wave 2 research report |
| Lepanjuuri, Katriina and Cornick, Peter and Leach, Tom | 2018 | Children's services omnibus: wave 3 research report |
| Lewis, Ian and Lenehan, Christine | 2015 | Report of the Children and Young People’s Health Outcomes Forum 2014/15 |
| Local Government Association | 2022 | Form and function exploring structural change in children's services 2022 |
| Local Government Association | 2016 | Healthy futures 2016 |
| Local Government Association | 2019 | Improving children and young people’s mental health and emotional wellbeing 2019 |
| Local Government Association | 2020 | Planning commissioning funding supporting provision for post-16 high needs students 2020 |
| Local Government and Social Care Ombudsman | 2019 | Not going to plan? : : education, health and care plans two years on |
| London, Councils | 2019 | Inclusive practice: the role of mainstream schools and local authorities in supporting children with SEND |
| Long, R. | 2017 | House of Commons Library: Briefing paper: Number 07020, 18 April 2017: Special Educational Needs: support in England |
| Long, R. | 2018 | House of Commons Library: Briefing paper: Number 07020, 20 April 2018: Special Educational Needs: support in England |
| Long, Robert and Roberts, Nerys and Danechi, Shadi | 2020 | Special educational needs : : support in England |
| Lundy, Laura and Byrne, Bronagh and McKeown, Paschal | 2012 | Review of transitions to adult services for young people with learning disabilities |
| MacLullich, A. |  | The assessment and management of Additional Support Needs (ASN) in Gaelic Medium Education (GME) and bilingual education |
| Mann, Nicole and Vakil, Shernavaz | 2018 | Collaboration Among Professionals Working With English Learners With Disabilities in a Newcomer School: A Case Study |
| Manning, J. A. | 2016 | An Analysis of the experience of transitioning from school to Further Education college for three young people who have an Education, Health and Care Plan |
| Maringe, Miniase | 2021 | Stories of Assertive Outreach Team Mental Health Patients |
| Marsh, Alan and Gray, Peter and Norwich, Brahm | 2021 | Variation in High Needs Block allocations to English LAs: Research commissioned by SEN Policy Research Forum |
| Marshall, Lydia and Leach, Thomas and Cornick, Peter | 2017 | Children's services omnibus: wave 1 research report |
| McCartney, A. | 2019 | An exploration of the use of collective preferences when making joint decisions as part of a multi-professional team that supports children with austism who are at risk of being excluded |
| McDermid, Samantha | 2015 | Evaluation of the made to measure pilot: pooling personal budgets: final evaluation report |
| McKean, C. and Gerrits, E. and Tulip, J. and Tolonen, A. K. | 2019 | Service delivery for children with language disorders across Europe and beyond |
| McShea, L. | 2016 | ‘I will make a difference’: using the 5As model to improve issues for adults with learning disabilities and hearing loss |
| Mencap | 2012 | Out of sight : : stopping the neglect and abuse of people with a learning disability |
| Miller, O. and Garner, M. | 2018 | Professional development to meet special educational needs: The role of the special educational needs training consortium (SENTC) |
| Moloney, M. and McCarthy, E. | 2018 | INTENTIONAL LEADERSHIP FOR EFFECTIVE INCLUSION IN EARLY CHILDHOOD EDUCATION AND CARE: Exploring Core Themes and Strategies |
| Morris, Rachel I. and Atkinson, Cathy | 2017 | Exploring the Potential Contribution of Educational Psychologists to Post-School Practice |
| Moscardini, L. | 2013 | Additional Support Needs |
| Moscardini, L. | 2015 | Music for All: Musical Instrument Instruction and Equity in Scotland's Schools |
| Moyse, R. and Porter, J. | 2015 | Key barriers to inclusion for girls with Asperger’s syndrome at primary school |
| Mughal, F. and England, E. | 2016 | The mental health of young people: the view from primary care |
| Mullins, Brigid | 2008 | Exploring key working: parents' perceptions of key workers in Clare Early Intervention Service (CEIS)/[thesis] by Brigid Mullins for Masters in Health Science (Primary Care) |
| Munro, Emily R. and et, al | 2018 | Re-imagining social care services in co-production with disabled parents |
| National Audit Office | 2019 | Support for pupils with special educational needs and disabilities in England |
| National Autistic Society | 2012 | School report 2021 |
| National Collaborating Centre For Mental, Health and National Institute For, Health and Care, Excellence | 2013 | Autism: the management and support of children and young people on the autism spectrum: CG170 |
| National Development Team For, Inclusion | 2019 | The right to a relationship: addressing the barriers that people with learning disabilities face in developing and sustaining intimate and sexual relationships |
| NEF Consulting | 2009 | The social and economic value of short breaks |
| Neil Humphrey and Squires, Garry | 2011 | Achievement for All National Evaluation: Final report |
| Nevile, Ann |  | The Three Sector Solution |
| NHS England | 2017 | Developing support and services for children and young people with a learning disability, autism or both |
| Nisbet, P. | 2021 | CALL Scotland Annual Report 2020-2021 |
| Nisbet, P. | 2020 | CALL Scotland Annual Report 2019-2020 |
| O'Boyle, Helena and Hoerger, Marguerite | 2020 | Overcoming Barriers to Aba Implementation in Maintained Sen Schools in the UK |
| O’Connor, L. | 2021 | Social, emotional and mental health |
| O'Riordan, Zoe | 2011 | The experiences and support of school-leavers with social, emotional and behavioural difficulties |
| OFSTED | 2012 | Protecting disabled children: thematic inspection |
| OFSTED | 2012 | Communication is the key 2012 |
| OFSTED | 2022 | Alternative provision for primary-age pupils in England 2022 |
| OFSTED | 2020 | An evaluation of the framework 2020 |
| OFSTED | 2013 | Critical issues in the provision of youth work for young disabled people 2013 |
| OFSTED | 2015 | Early help Whose responsibility 2015 |
| OFSTED | 2022 | Education recovery in schools summer 2022 |
| OFSTED | 2020 | Feeling heard Partner agencies and children with mental ill health 2020 |
| OFSTED | 2014 | From a distance Looked after children living away from their home area 2014 |
| OFSTED | 2022 | How local authorities plan for sufficiency of accommodation 2022 |
| OFSTED | 2021 | How remote education is working for CYP SEND 2021 |
| OFSTED | 2015 | Joining the dots Effective leadership of children's services 2015 |
| OFSTED | 2016 | LASEND consultation report FINAL 2016 |
| OFSTED | 2016 | Moving forward FE skills adult life 2016 |
| OFSTED | 2022 | Ready or not 2022 |
| OFSTED | 2020 | SEND COVID-19 briefing November 2020 |
| OFSTED | 2020 | SEND COVID-19 briefing October 2020 |
| OFSTED | 2022 | SEND inspections CYP consultation response 2022 |
| OFSTED | 2012 | The impact of virtual schools on the educational progress of looked after children 2012 |
| OFSTED | 2013 | What about the children 2013 |
| OFSTED | 2021 | State-funded schools inspections and outcomes as at 31 August 2021: main findings |
| OFSTED | 2021 | The Annual Report of Her Majesty’s Chief Inspector of Education, Children’s Services and Skills 2020/21 |
| OFSTED | 2021 | Supporting SEND |
| OFSTED | 2010 | The special educational needs and disability review: A statement is not enough |
| OFSTED and Care Quality Commission | 2017 | Local area SEND inspections: one year on |
| Parish, N. and Bryant, B. | 2015 | Research on funding for young people with special educational needs |
| Parish, Natalie and Bryant, Ben | 2015 | Research on funding for young people with special educational needs: research report |
| Parish, Natalie and Bryant, Ben and Swords, Beth | 2019 | Have we reached a 'tipping point'? Trends in spending for children and young people with SEND in England |
| Parish, Natalie and Bryant, Ben and Swords, Beth | 2020 | Children Missing Education 2020 |
| Parish, Natalie and Bryant, Ben and Bunyan, Andrew and Choulerton, Diana | 2019 | Under pressure : : an exploration of demand and spending in children’s social care and for children with special educational needs in London |
| Parish, N., Swords, B., and Marks, L. | 2020 | Building resilience 2020 |
| Partridge, R. | 2017 | Understanding the Roles of the Designer in Health Care: A Practice-Based Study into Supporting Adolescents with Long-Term Conditions |
| Patterson, J. and Loomis, C. |  | 'Education and Enterprise' Village: supporting visually impaired (VI) learners locally, nationally and internationally through 'values' education and service |
| Pereira, Isabella and et, al | 2017 | National evaluation of the Troubled Families Programme 2015-2020: service transformation - case study research: part 1 |
| Philip, D. | 2020 | Walking through treacle: The educational experiences of a group of young, disabled LGBT+ students |
| Pitts, L. | 2020 | Utilising Applied Behaviour Analysis in Schools for Pupils with Special Educational Needs: Applied Behaviour Analysis in Schools |
| Pitts, Laura | 2020 | Utilising Applied Behaviour Analysis in Schools for Pupils with Special Educational Needs |
| Pona, Iryna and Hounsell, David | 2012 | The value of independent advocacy for looked after children and young people |
| Prison Reform Trust | 2012 | Making the difference : : the role of adult social care services in supporting vulnerable offenders |
| Quin, Andrew J | 2015 | Against the odds: success and collaboration in safeguarding children |
| Rafferty, Margaret and Turner, Grace and Tobin, Andrea | 2018 | Co-designing an Integrated Care Pathway for Children and Families with a Neuromuscular Disorder in Ireland |
| Rao, A. | 2020 | Exploring children's and education professionals' views on children's involvement in the Education, Health, and Care process |
| Rashid, A. | 2016 | Yonder: Rosacea, youth mental health, diagnosing arthritis, and telephone triage |
| Redford, Morag | 2013 | Interprofessional communication in education: a case study |
| Redwood, Morwenna | 2015 | Insider perspectives of education, health and care plans |
| Rees, K. | 2020 | Understanding the Development of Young Children with Complex Additional Support Needs |
| Rees, Sally | 2016 | Moving on together: what makes a successful transition into adulthood for young disabled people (14-25 years of age)? |
| Regulation and Quality Improvement, Authority | 2013 | A baseline assessment and review of community services for children with a disability |
| Reid, Rachel | 2012 | Exploring parental experiences of inclusion for children with autism in mainstream primary education |
| Richards, Gill and Starbuck, Jane | 2019 | Effective Interventions and Strategies for Pupils with SEND: Using Evidence-Based Methods for Maximum Impact |
| Richards, Hazel | 2019 | Special Educational Needs Co-ordinator Perceptions of Practice and Potential: Investigating Education and Health Care Plan Implementation in Early Years and Primary Education |
| Riddell, S. and Weedon, E. |  | Narratives of inclusion: Representations of inclusion through policy and statistics in Scotland |
| Riddell, Sheila | 2012 | Education and disability/special needs: policies and practices in education, training and employment for students with disabilities and special education needs in the EU: an independent report prepared for the European Commission |
| Riddick, Paul | 2012 | The viewpoints of professionals working in special educational needs/disability services about children and young people's participation |
| Ridgway, Rosie | 2017 | Supporting struggling learners: Teachers, learners and labels of SEN |
| Rip, Stars and et, al | 2018 | A quality and rights-based framework for professionals involved in Education, Health and Care Plans (EHCPs) for disabled children and young people |
| Rip, Stars and et, al | 2018 | Defining quality and rights-based Education, Health and Care Plans (EHCPs) for disabled children and young people |
| Rip, Stars and et, al | 2015 | RIP STARS, Defining quality and rights-based Education, Health and Care Plans (EHCPs) for disabled children and young people, |
| Robbins, Eva | 2016 | A constructivist grounded theory study of the decision-making processes of professionals in a children's service, mixed multi-disciplinary assessment team |
| Rokviƒá, V. and Mariƒá, M. and Bajagiƒá, A. and ƒêukiƒá, M. and Bogunoviƒá, B. |  | Children with Additional Support Needs in Music Education |
| Rose, Jo and Stanforth, Alex and Gilmore, Gwen and Bevan-Brown, Jill | 2018 | "You Have to Do Something beyond Containing": Developing Inclusive Systems in a Partnership of Primary Schools |
| Rosenbloom, L. | 2014 | Why do parents litigate and what does it do for the family? |
| Rowe, Niamh | 2015 | Exploring how the role of the key worker can support families in the community who have experience of a loved one with a Traumatic Brain Injury |
| Rudgley, Lisa | 2013 | Left high and dry: healthcare transition experiences of young adults with attention deficit hyperactivity disorder |
| Rupasinha, James and Bond, Caroline and Woods, Kevin | 2014 | An Exploratory Analysis of Educational Psychologists' Understandings of Ethnic Minority Cultural Factors Within Assessments for Autistic Spectrum Condition |
| Russell, Jade | 2020 | An exploration of meetings between parents and multiple professionals through bounded meta-study and collaborative action research |
| Ryder, Rebekah and Edwards, Amy and Rix, Katie | 2017 | Children missing out on education |
| Samarasinghe, Shane | 2018 | Now is the time: supporting disabled children and their families |
| SCOTLAND, TACKLING CHILD ABUSE IN | 2016 | TACKLING CHILD ABUSE IN SCOTLAND |
| Scottish Government | 2017 | 5 year survey of need for mental health inpatient care for children and young people in Scotland with learning disability and/or autism : : full report |
| Scott, Lee | 2016 | SEND: The schools and colleges experience: A REPORT TO THE SECRETARY OF STATE FOR EDUCATION BY LEE SCOTT |
| Sebba, Judy and et, al | 2015 | The educational progress of looked after children in England: linking care and educational data |
| Shared Intelligence | 2020 | Evaluation of LGA Children's SLI 2020 |
| Sharma, P. | 2021 | Eliciting the Voice of Children and Young People in Their Education, Health and Care Plans, and Annual Reviews : Achieving Meaningful Participation |
| Shaw, Bart | 2021 | Special educational needs and disabilities |
| Shepherd, C. and Hanson, J. and Dodd, V. | 2018 | Experiences of Education, Health and Care plans: a multivariate analysis |
| Skipp, Amy and Hopwood, Vicky | 2016 | Mapping user experiences of the Education, Health and Care process : : a qualitative study : research report |
| Skipp, Amy and Hopwood, Vicky and Research, A. S. K. | 2016 | Mapping user experiences of the education, health and care process: a qualitative study |
| Sloper, P., Beecham, J., Clarke, S., Franklin, A., Moran, N., Cusworth, L. | 2010 | Models of Multiagency Services for Transition to Adult Services for Disabled Young People and those with Complex Health Needs: Impact and Costs. Report to the Department of Health. |
| Small, Iesha and Mulcahy, Ellie and Viner, Kate Bowen and Menzies, Loic |  | A PLACE TO CALL HOME |
| Smith, Chloe and Moore, Richard | 2020 | Children's services omnibus: wave 5 research report |
| Smith, Katherine | 2019 | The impact of the Special Educational Needs and Disabilities Code of Practice: 0‚Äì25 Years on relationships between SENCOs, parents and colleagues |
| Smith, L. | 2020 | Parental narratives around decision-making regarding secondary educational provision for children with an Education, Health and Care plan |
| Smith, Lucy and Cameron, Genevieve and Vanson, Tim | 2014 | Evaluation of the Special Educational Needs and Disability (SEND) Pathfinder Programme: impact research report: qualitative research with families (second cohort): research report |
| Snow, P. and Kelly, B. and Mendes, P. and O'Donohue, D. | 2016 | A comparison of young people with a disability transitioning from out-of-home care in Australia and Northern Ireland |
| Spivack, R. and Craston, M. and Thom, G. | 2014 | Special Educational Needs and Disability Pathfinder Programme Evaluation, Thematic Report: The Education, Health and Care (EHC) Planning Pathway for ‚Ä¶ |
| Spivack, Rhian and Craston, Meera and Redman, Rachel | 2014 | Evaluation of the Special Educational Needs and Disability Pathfinder Programme: thematic report: collaborative working with social care: research report |
| Spivack, Rhian and Craston, Meera and Thom, Graham | 2014 | Special Educational Needs and Disability Pathfinder Programme evaluation : : thematic report : the Education, Health and Care (EHC) Planning Pathway for families that are new to the SEN system : research report |
| Stalker, Kirsten and et, al | 2013 | It always comes down to money: recent changes in service provision to disabled children, young people and their families in Scotland |
| Such, Amy | 2017 | What are the experiences of educational psychologists when working with adolescent girls in mainstream education with social communication difficulties?: an exploratory study |
| Tabassum, Nadia | 2013 | Using Solution-Focused Pupil Support Meetings (SFPSMs) to Support Pupils Identified as Having Social, Emotional and Behavioural Difficulties (SEBD): Early Intervention at the Year 6/7 Transition Phase |
| Taberner, Joanne |  | ‘There are too many kids with special educational needs’ (Squires, 2017) |
| Tarleton, Beth and Porter, Sue | 2011 | Transition in Suffolk |
| Tayler, Beth | 2014 | How Staff Conceptualise and Support Recovery in Young People With Mental Health Difficulties: A Delphi Survey |
| Taylor, J., Cameron, A., Jones, C., Franklin, A., Stalker, K., & Fry, D. | 2015 | Deaf and disabled children talking about child protection (Research report K201503). |
| Taylor, Julie and et, al | 2014 | Disabled children and child protection in Scotland: an investigation into the relationship between professional practice, child protection and disability |
| Taylor, Julie and et, al | 2014 | Disabled children and child protection in Scotland: investigation into the relationship between professional practice, child protection and disability |
| Taylor, Julie and et, al | 2015 | Deaf and disabled children talking about child protection |
| Teale, S. and Thompson, M. J. J. | 2021 | Specialist services: Education for children with autism spectrum disorders and social stories for parents of autistic children |
| Thackray, Liz | 2013 | The meanings of the 'struggle/fight metaphor' in the special needs domain : the experiences of practitioners and parents of children with high functioning autism spectrum conditions |
| Thom, Graham and Agur, Maya | 2014 | Special educational needs and disability pathfinder programme evaluation: thematic report: provision for older young people, aged 19-25: research report |
| Thom, Graham and Agur, Maya and Daff, Kerry | 2014 | Evaluation of the Special Educational Needs and Disability Pathfinder Programme: thematic report: transition and the engagement of post-16 providers: research report |
| Thom, Graham and et, al | 2015 | The Special Educational Needs and Disability Pathfinder Programme evaluation: final impact research report |
| Thomas, L. | 2017 | Are parents being heard? Parents' experiences of participating in multi-professional meetings as part of the Education, Health and Care Plan process |
| Thomson, I. F. F. and Robinson, D. and Shepherd, C. | 2017 | Experiences of Education, Health and Care plans |
| Timpson, Edward | 2019 | Timpson review of school exclusion |
| Timpson, Edward and Poulter, Dan | 2013 | Support and aspiration : : implementing the new 0-25 special needs system |
| Toma, Madalina Teodora | 2012 | "even the dog has attention deficit hyperactivity disorder" (adhd): a cross-cultural comparative study of parents' and teachers' knowledge and attitudes towards adhd in Scotland and Romania |
| Townsely, Ruth and et, al | 2014 | Research into employment outcomes for young people with autistic spectrum disorders |
| Turney, Danielle and Tarleton, Beth and Tilbury, Nadine | 2018 | Supporting parents who have learning disabilities: strategic briefing |
| Twells, J. | 2020 | Identifying barriers to and facilitators for educational inclusion for young people who offend |
| Uk, N. G. A. | 2022 | Evidence review for palliative and end of life care |
| Uk, N. G. A. | 2022 | Evidence review for supporting participation in education and social activities |
| Uk, N. G. A. | 2022 | Evidence review for promoting and maintaining inclusion, independence and wellbeing |
| Uk, N. G. A. | 2022 | Evidence review for planning and managing transition from children's to adults' services |
| Uk, N. G. A. | 2022 | Evidence review for involving children and young people |
| Uk, N. G. A. | 2022 | Evidence review for preparation for employment |
| Uk, N. G. A. | 2022 | ‚Ä¶ review for preparation for employment: Disabled children and young people up to 25 with severe complex needs: integrated service delivery and organisation across ‚Ä¶ |
| Vahid, B. and Harwood, S. and Brown, S. | 2013 | 500 tips for working with children with special needs |
| Visser, J. | 2018 | A broad, balanced, relevant and differentiated curriculum |
| Vusio, Frane | 2020 | Reform Models for Children and Young People Mental Health Services in the Uk : Evaluation of the 0-19 Model's Early Intervention Approach |
| Walker, C. | 2012 | Will every child still matter? |
| Walker, Gary | 2018 | Working together for children: A critical introduction to multi-agency working |
| Ward, Rebecca and Thomas, Enlli and Sanoudaki, Eirini | 2020 | Profiling the Language Abilities of Welsh-English Bilingual Children with Down Syndrome |
| Waters, John | 2016 | The POET survey 2015-16 |
| Waters, John and et, al | 2015 | Report on the development and use of POET for children and young people with SEND |
| Waters, John and Hatton, Chris | 2014 | The POET surveys 2014 : : personal health budget holders and family carers |
| Wearmouth, J. | 2013 | Special educational needs: The basics |
| Wearmouth, J. | 2018 | Special educational needs and disability: the basics |
| Wearmouth, J. and Butler, C. | 2020 | Special educational needs co-coordinators’ perceptions of effective provision for including autistic children in primary and middle schools in England |
| Wearmouth, J. and Gosling, A. and Beams, J. and Davydaitis, S. | 2017 | Understanding special educational needs and disability in the early years: Principles and perspectives |
| Wearmouth, Janice | 2021 | Special educational needs and disabilities in schools: a critical introduction |
| Webb, Mary Anne and et, al | 2014 | Living with adversity: a qualitative study of families with multiple and complex needs |
| Webster, Rob | 2022 | The Inclusion Illusion: How children with special educational needs experience mainstream schools |
| Wedell, K | 2015 | Points from the SENCo Forum: The changing context of SENCos’ work |
| Wedell, K. | 2018 | Special educational provision in the context of legislative changes |
| Wedell, Klaus | 2019 | Recognising paradigm shifts: lessons from the Warnock report |
| Wenham, L. | 2021 | Misunderstood, misinterpreted and mismanaged: Voices of students marginalised in a secondary school |
| Whalley, Diane and Ainscow, Melvin and Gunter, Helen | 2013 | Policy and Practice for Children With Complex Needs |
| Wharton, J. C. | 2021 | SENCOs and social workers: Working together |
| Whitaker, Emilie | 2015 | Personalisation in children’s social work: an ethnographic study of practice in England |
| White, Clarissa and Day, Laurie | 2016 | National evaluation of the Troubled Families programme: process evaluation final report |
| Williams, M. and Coare, P. and Marvell, R. and Pollard, E. | 2015 | ‚Ä¶ mental health problems and intensive support needs: Report to HEFCE by the Institute for Employment Studies (IES) and Researching Equity, Access and Partnership ‚Ä¶ |
| Wilson, C. E. and Roberts, G. and Gillan, N. and Ohlsen, C. and Robertson, D. and Zinkstok, J. | 2013 | The NICE guideline on recognition, referral, diagnosis and management of adults on the autism spectrum |
| Wilson, Eleanor | 2013 | A delicate equilibrium: living with Huntington’s disease |
| Wiredu, Margaret | 2013 | An investigation into the characteristics of effective school-based consultation |
| Wong, B. and Butler, D. | 2012 | Learning about Learning Disabilities |
| Wyton, Helen and Atkinson, Catharine | 2013 | Developing the Work of the Educational Psychologist in a Youth Offending Team |
| Ymca | 2016 | I am whole stories: a collection of stories from young people about their experiences of mental health difficulties |
| Ymca | 2016 | I am whole: a report investigating the stigma faced by young people experiencing mental health difficulties |
| Young, Lisa and Horvath, Tessa | 2019 | Promising practice from the frontline |
| Young, Susannah | 2017 | Educational psychologist and special educational needs co-ordinator constructions of effective collaborative working: an exploratory study |
| **Not UK** | | |
| √ñzer, D. and Nalbant, S. and A«ßlamƒ±»ô, E. and Baran, F. | 2013 | Physical education teachers' attitudes towards children with intellectual disability: the impact of time in service, gender, and previous acquaintance |
| Aalborg, Annette E. and Miller, Brenda A. and Husson, Gail and Byrnes, Hilary F. and Bauman, Karl E. and Spoth, Richard L. | 2012 | Implementation of adolescent family-based substance use prevention programmes in health care settings: Comparisons across conditions and programmes |
| Adams, Richard C. and Levy, Susan E. | 2017 | Shared Decision-Making and Children With Disabilities: Pathways to Consensus |
| Adkins, D. and Bushman, B. | 2015 | A special needs approach: a study of how libraries can start programs for children with disabilities |
| Adolfsson, M. and Bj√∂rck-Akesson, E. and Lim, C. I. | 2013 | Code sets for everyday life situations of children aged 0-6: Sleeping, Mealtimes and Play - A study based on the International Classification of Functioning, Disability and Health for Children and Youth |
| Agarwal, Rumi and Maddux, Marlaina and Marolda, Heather and Quintana, Jordan and Wagner, Eric and Burke, Shanna | 2022 | An Analysis of Current Model Programmes for Adults with Neurodevelopmental Disorders |
| Agota, S. | 2014 | Social integration of children with mild intellectual disabilities in the primary school |
| Ahessy, B. | 2021 | ‘Boom Boom in the Zoom Zoom Room’: Online music therapy with children and adolescents with visual impairment |
| Ahmed, R. and Borst, J. M. and Yong, C. W. and Aslani, P. | 2014 | Do parents of children with attention-deficit/hyperactivity disorder (ADHD) receive adequate information about the disorder and its treatments? A qualitative investigation |
| Ajuwon, P. M. and Lechtenberger, D. A. and Griffin-Shirley, N. | 2012 | General Education Pre-Service Teachers Perceptions of Including Students with Disabilities in Their Classrooms |
| Ali, Lilas and Krevers, Barbro and Sj√∂str√∂m, Nils and Sk√§rs√§ter, Ingela | 2014 | Effectiveness of web-based versus folder support interventions for young informal carers of persons with mental illness: A randomized controlled trial |
| Aljunied, M. and Frederickson, N. | 2014 | Utility of the International Classification of Functioning, Disability and Health (ICF) for educational psychologists’ work |
| Allen, K. and Melendez-Torres, G. J. and Ford, T. and Bonell, C. and Finning, K. and Fredlund, M. and Gainsbury, A. and Berry, V. | 2022 | Family focused interventions that address parental domestic violence and abuse, mental ill-health, and substance misuse in combination: A systematic review |
| Allin, S. and Stabile, M. | 2012 | Socioeconomic status and child health: what is the role of health care, health conditions, injuries and maternal health? |
| Ambrose, Helen | 2021 | Experiencing success: an occupational therapy partnership programme. Gymnastics for children with attention deficit hyperactivity disorder |
| Amini, Kourosh and Marks, Dougie and Cheraghi, Mohammad Ali and Eftekhar, Mehrdad and Negarandeh, Reza | 2019 | Attempting to Restore Integrity of the Self: A Grounded Theory Study of Recovery From Major Depressive Disorder |
| Amoako, R. and Attia, I. and Dinko, D. J. | 2021 | Managing Children with Special Educational Needs and Disabilities: Pre-Service Teachers' Perceptions on Collaboration Between Professionals and Parents |
| Anaby, Dana and et, al | 2015 | Focus on participation for children and youth with disabilities: supporting therapy practice through a guided knowledge translation process |
| Andelic, N. and Soberg, H. L. and Berntsen, S. and Sigurdardottir, S. and Roe, C. | 2014 | Self-perceived health care needs and delivery of health care services 5 years after moderate-to-severe traumatic brain injury |
| Andrade, P. M. O. and Oliveira Ferreira, Fernanda and Mendon√ßa, Ana Paula and Haase, Vitor Geraldi | 2012 | Content identification of the interdisciplinary assessment of cerebral palsy using the International Classification of Functioning, Disability and Health as reference |
| Angeli, Jennifer M. and Schwab, Sarah M. and Huijs, Lobke and Sheehan, Amber and Harpster, Karen | 2021 | ICF-inspired goal-setting in developmental rehabilitation: an innovative framework for pediatric therapists |
| Arabeyat, Rand and Bkheitan, Rami | 2021 | The Impact of Career Counseling Program in Crystallization of Career Interests for Persons with simple intellectual disability |
| Armstrong, D. | 2014 | Educator perceptions of children who present with social, emotional and behavioural difficulties: A literature review with implications for recent educational policy in England and internationally |
| Aron, L. and Loprest, P. | 2012 | Disability and the education system |
| Arrillaga, Ana Marv≠a Gonzalez-Pinto and Ugarte, Amaia Ugarte and Ortega, Itxaso Gonzalez and Marquez, Sara Ponce and Rodriguez, Angel Faria and Hernaiz, Josu Xabier Llano | 2016 | On line psycho-education: a complementary approach to the treatment of bipolar disorder |
| Augsberger, Astraea and et, al | 2021 | Examining a child welfare parenting intervention for parents with intellectual disabilities |
| Azar, Sandra T. and Maggi, Mirella C. and Proctor, Stephon N. | 2013 | Practices changes in the child protection system to address the needs of parents with cognitive disabilities |
| Bailey, M. and Doody, O. and Lyons, R. | 2016 | Surveying community nursing support for persons with an intellectual disability and palliative care needs |
| Balestra, Simone and Eugster, Beatrix and Liebert, Helge | 2020 | Summer-born struggle : : the effect of school starting age on health, education, and work |
| Ballard, S. L. and Dymond, S. K. | 2016 | Acquired severe disabilities and complex health care needs: Access to inclusive education |
| Barrio, Concepcion and Hernandez, Mercedes and Gaona, Lizeth | 2016 | The family caregiving context among adults with disabilities: a review of the research on developmental disabilities, serious mental illness, and traumatic brain injury |
| Battistin, Tiziana and et, al | 2021 | Distance support and online intervention to blind and visually impaired children during the pandemic COVID-19 |
| Bauminger-Zviely, Nirit and Eden, Sigal and Zancanaro, Massimo and Weiss, Patrice L. and Gal, Eynat | 2013 | Increasing social engagement in children with high-functioning autism spectrum disorder using collaborative technologies in the school environment |
| Bearss, Karen and Tagavi, Daina and Lyon, Aaron R. and Locke, Jill | 2022 | Iterative redesign of a caregiver-mediated intervention for use in educational settings |
| Bekken, Wenche | 2022 | Negotiating embodied knowledge in the transition to adulthood: a social model of human rights |
| Beneke, M. R. and Machado, E. and Taitingfong, J. | 2022 | Dismantling Carceral Logics in the Urban Early Literacy Classroom: Towards Liberatory Literacy Pedagogies with/for Multiply-Marginalized Young Children |
| Bennett, K. G. and Patterson, A. K. and Schafer, K. and Haase, M. and Ranganathan, K. and Carlozzi, N. and Vercler, C. J. and Kasten, S. J. and Buchman, S. R. and Waljee, J. F. | 2020 | Decision-Making in Cleft-Related Surgery: A Qualitative Analysis of Patients and Caregivers |
| Bentzen, Marte and Malmquist, Linn Kristin | 2022 | Differences in participation across physical activity contexts between adolescents with and without disability over three years: a self-determination theory perspective |
| Berninger, Virginia W. and Lee, Yen-Ling and Abbott, Robert D. and Breznitz, Zvia | 2013 | Teaching Children with Dyslexia to Spell in a Reading-Writers' Workshop |
| Berns, H. M. and Drake, D. | 2021 | Postpartum Depression Screening for Mothers of Babies in the Neonatal Intensive Care Unit |
| Bexelius, Annemarie and Carlberg, Eva Brogren and L√∂wing, Kristina | 2018 | Quality of goal setting in pediatric rehabilitation: A ‘SMART approach |
| Bezzina, L. A. and Rice, L. J. and Howlin, P. and Tonge, B. J. and Einfeld, S. L. | 2017 | Syndrome specific modules to enhance the Stepping Stones Triple P public health intervention |
| Bhroin, √ìN and King, F. and Prunty, A. | 2016 | Teachers' knowledge and practice relating to the individual education plan and learning outcomes for pupils with special educational needs |
| Blakeslee, Jennifer E. and et, al | 2020 | Evaluating the My Life self-determination model for older youth in foster care: establishing efficacy and exploring moderation of response to intervention |
| Blixen, Carol and Perzynski, Adam T. and Bukach, Ashley and Howland, Molly and Sajatovic, Martha | 2016 | Patients’ perceptions of barriers to self-managing bipolar disorder: A qualitative study |
| Bo, S. and Sharp, C. and Kongerslev, M. T. and Luyten, P. and Fonagy, P. | 2022 | Improving treatment outcomes for adolescents with borderline personality disorder through a socioecological approach |
| Bolin, S. J. and Rueda, H. A. and Linton, K. F. | 2018 | Grand challenges in school social work: Collaboration and constraint in school social workers' sexuality support for children with disabilities |
| Bostrom, Petra and Broberg, Malin | 2018 | Protection and restriction: a mixed-methods study of self-reported well-being among youth with intellectual disabilities |
| Bourke-Taylor, H. and Cotter, C. | 2015 | Complementary, alternative, and mainstream service use among families with young children with multiple disabilities: family costs to access choices |
| Bowers, Hayley and Manion, Ian and Papadopoulos, Despina and Gauvreau, Emily | 2013 | Stigma in school-based mental health: perceptions of young people and service providers |
| Brenner, M. and Doyle, A. and Begley, T. and Doyle, C. and Hill, K. and Murphy, M. | 2021 | Enhancing care of children with complex healthcare needs: an improvement project in a community health organisation in Ireland |
| Broder Fingert, Sarabeth and Carter, Alice and Pierce, Karen and Stone, Wendy L. and Wetherby, Amy and Scheldrick, Chris and Smith, Christopher and Bacon, Elizabeth and James, Stephen N. and Iba√±ez, Lisa and Feinberg, Emily | 2019 | Implementing systems-based innovations to improve access to early screening, diagnosis, and treatment services for children with autism spectrum disorder: An Autism Spectrum Disorder Pediatric, Early Detection, Engagement, and Services network study |
| Brolan, C. E. and Boyle, F. M. and Dean, J. H. and Taylor Gomez, M. and Ware, R. S. and Lennox, N. G. | 2012 | Health advocacy: a vital step in attaining human rights for adults with intellectual disability |
| Bruggink, M. and Goei, S. L. and Koot, H. M. | 2016 | Teachers' capacities to meet students' additional support needs in mainstream primary education |
| Bruggink, M. and Goei, S. L. and Koot, H. M. | 2016 | Teachers' perceptions of students' additional support needs: in the eye of the beholder? |
| Bruggink, M. and Meijer, W. and Goei, S. L. and Koot, H. M. |  | Teachers' Perceptions of Students' Additional Support Needs in Mainstream Primary Education |
| Bruggink, M. and Meijer, W. and Goei, S. L. and Koot, H. M. | 2014 | Teachers' perceptions of additional support needs of students in mainstream primary education |
| Buli-Holmberg, J. and Nilsen, S. and Skogen, K. | 2019 | Inclusion for Pupils with Special Educational Needs in Individualistic and Collaborative School Cultures |
| Burke, Meghan M. and Waitz-Kudla, Sydney N. and Rabideau, Carol and Taylor, Julie Lounds and Hodapp, Robert M. | 2019 | Pulling back the curtain: Issues in conducting an intervention study with transition-aged youth with autism spectrum disorder and their families |
| Butler, Mary Pat and Begley, Mary and Parahoo, Kader and Finn, Sophia | 2014 | Getting psychosocial interventions into mental health nursing practice: a survey of skill use and perceived benefits to service users |
| Cameron, David Lansing and Tveit, Anne Dorthe | 2019 | 'You know that collaboration works when ... ' identifying the features of successful collaboration on behalf of children with disabilities in early childhood education and care |
| Cameron, H. and Muskett, T. | 2014 | Recognising Autism Spectrum Disorders in Primary Care: Perspectives of Speech and Language Therapists |
| Cameron, Jacqui and Lee, Nicole K. and Strickland, Heidi and Livingston, Michael | 2012 | Improving case management outcomes for young people |
| Canty, H. R. and Sauter, A. and Zuckerman, K. and Cobian, M. and Grigsby, T. | 2019 | Mothers' Perspectives on Follow-up for Postpartum Depression Screening in Primary Care |
| Carr-Fanning, K. and Mc Guckin, C. | 2018 | The powerless or the empowered? Stakeholders' experiences of diagnosis and treatment for attention-deficit hyperactivity disorder in Ireland |
| Carroll, C. and Sixsmith, J. | 2016 | Exploring the facilitation of young children with disabilities in research about their early intervention service |
| Carroll, E. and McCoy, S. and Mihut, G. | 2022 | Exploring cumulative disadvantage in early school leaving and planned post-school pathways among those identified with special educational needs in Irish primary schools |
| Cascales-Mart√≠nez, A. and Mart√≠nez-Segura, M. J. | 2016 | Using an augmented reality enhanced tabletop system to promote learning of mathematics: A case study with students with special educational needs |
| Casserly, A. M. and Padden, A. | 2018 | Teachers' views of co-teaching approaches in addressing pupils with special educational needs (SEN) in multi-grade classrooms |
| Cassidy, Corey and Winter, Patricia and Cumbia, Skyler | 2020 | An interprofessional early childhood training program: speech-language pathology and music therapy student outcomes and reflections |
| Causin, K. G. and Albert, K. M. and Carbone, V. J. | 2013 | The role of joint control in teaching listener responding to children with autism and other developmental disabilities |
| Chadwick, D. D. and Mannan, H. and Garcia Iriarte, E. and McConkey, R. and O'Brien, P. and Finlay, F. and Lawlor, A. and Harrington, G. | 2013 | Family voices: life for family carers of people with intellectual disabilities in Ireland |
| Chang, Lucy and Douglas, Nadine and Scanlan, Justin Newton and Still, Megan | 2016 | Implementation of the enhanced intersectoral links approach to support increased employment outcomes for consumers of a large metropolitan mental health service |
| Charman, T. | 2012 | Modest size RCT indicates that short-term joint attention and symbolic play intervention improves shared positive affect in social interactions for preschool children with autism |
| Cheak-Zamora, Nancy C. and Teti, Michelle and First, Jennifer | 2015 | ‘Transitions are scary for our kids, and they're scary for us’: family member and youth perspectives on the challenges of transitioning to adulthood with autism |
| Chien, Chi-Wen and et, al | 2017 | Exploring environmental restrictions on everyday life participation of children with developmental disability |
| Cihon, T. M. and Cihon, J. H. and Bedient, G. M. | 2016 | Establishing a common vocabulary of key concepts for the effective implementation of applied behavior analysis |
| Cithambaram, K. and Duffy, M. and Courtney, E. | 2020 | Disclosure and plan of care at end of life: Perspectives of people with intellectual disabilities and families in Ireland |
| Clegg, J. and Bigby, C. | 2017 | Debates about dedifferentiation: twenty-first century thinking about people with intellectual disabilities as distinct members of the disability group1 2 |
| Cloet, Eva and De Meirleir, Linda and Dan, Bernard and Leys, Mark | 2018 | Integrated care for diagnostics along the disease trajectory of children with a neurobiological developmental delay or disorder. A network approach |
| Coates, Dominiek and Howe, Deborah | 2017 | Improving throughput in a youth mental health service |
| Coelho, J. S. and Suen, J. and Marshall, S. and Zaid-Alkailani, H. and Geller, J. and Lam, P. Y. | 2022 | Treatment experiences of male and female youths with eating disorders |
| Cohen, Ayala and Mosek, Atalia | 2019 | "Power together": Professionals and parents of children with disabilities creating productive partnerships |
| Coker, Freya and Williams, Anne and Hayes, Laura and Hamann, Judy and Harvey, Carol | 2016 | Exploring the needs of diverse consumers experiencing mental illness and their families through family psychoeducation |
| Collings, Susan and et, al | 2020 | Benefits and limits of peer support for mothers with intellectual disability affected by domestic violence and child protection |
| Collings, Susan and Grace, Rebekah and Llewellyn, Gwynnyth | 2017 | The role of formal support in the lives of children of mothers with intellectual disability |
| Connaughton, Helen and Cline, Tony | 2021 | How far can social role valorisation theory help in transition planning for a school leaver with significant special needs? |
| Conti, D. and Di¬†Nuovo, S. and Buono, S. and Di¬†Nuovo, A. | 2017 | Robots in Education and Care of Children with Developmental Disabilities: A Study on Acceptance by Experienced and Future Professionals |
| Conti, D. and Trubia, G. and Buono, S. and Di Nuovo, S. and Di Nuovo, A. | 2021 | An empirical study on integrating a small humanoid robot to support the therapy of children with Autism Spectrum Disorder and Intellectual Disability |
| Coogle, Christan Grygas and Hanline, Mary Frances | 2016 | An exploratory study of family-centred help-giving practices in early intervention: families of young children with autism spectrum disorder |
| Coomer, R. A. | 2013 | The experiences of parents of children with mental disability regarding access to mental health care |
| Corby, Deirdre and Slevin, Eamonn and Cousins, Wendy | 2013 | Improving services through co-operative learning |
| Corr, Catherine and Santos, Rosa Milagros | 2017 | "Not in the same sandbox": cross-systems collaborations between early intervention and child welfare systems |
| Correa-Torres, S. M. and Muthukumaran, A. | 2022 | Impact of COVID-19 on services for students with visual impairment: Experiences and lessons from the field |
| Coyne, I. and McNamara, N. and Healy, M. and Gower, C. and Sarkar, M. and McNicholas, F. | 2015 | Adolescents' and parents' views of Child and Adolescent Mental Health Services ( CAMHS) in Ireland |
| Cramerotti, S. and Ianes, D. | 2016 | An ontology-based system for building individualized education plans for students with special educational needs |
| Crettenden, Angela and Wright, AnneMarie and Beilby, Erin | 2014 | Supporting families: outcomes of placement in voluntary out-of-home care for children and young people with disabilities and their families |
| Cribb, Serena and Kenny, Lorcan and Pellicano, Elizabeth | 2019 | 'I definitely feel more in control of my life': The perspectives of young autistic people and their parents on emerging adulthood |
| Crous, Gemma and Montserrat, Carme and Balaban, Ana | 2020 | Young people leaving care with intellectual disabilities or mental health problems: strengths and weaknesses in their transitions |
| Curtin, Margaret and Baker, Denise and Staines, Anthony and Perry, Ivan J. | 2014 | Are the special educational needs of children in their first year in primary school in Ireland being identified: a cross-sectional study |
| Dam, Levi van and Heijmans, Lotte and Stams, Geert Jan | 2021 | Youth initiated mentoring in social work: sustainable solution for youth with complex needs? |
| Dama, M. and Shah, J. and Norman, R. and Iyer, S. and Joober, R. and Schmitz, N. and Abdel-Baki, A. and Malla, A. | 2019 | Short duration of untreated psychosis enhances negative symptom remission in extended early intervention service for psychosis |
| Darzi, A. J. and Officer, A. and Abualghaib, O. and Akl, E. A. | 2016 | Stakeholders' perceptions of rehabilitation services for individuals living with disability: a survey study |
| Davey, Heather and Imms, Christine and Fossey, Ellie | 2015 | ‘Our child’s significant disability shapes our lives’: experiences of family social participation |
| Davis, E. and et, al | 2017 | Exploring quality of life of children with cerebral palsy and intellectual disability: what are the important domains of life? |
| Day, Kate and Starbuck, Rachael and Petrakis, Melissa | 2017 | Family group interventions in an early psychosis program: A re-evaluation of practice after 10‚Äâyears of service delivery |
| de Koning, Harry J. and Groenewoud, Johanna H. and Lantau, V. Kathleen and Tjiam, A. M. and Hoogeveen, W. Christina and de Faber, Jan Tjeerd H. N. and Juttmann, Rikard E. and Simonsz, Huibert J. | 2013 | Effectiveness of screening for amblyopia and other eye disorders in a prospective birth cohort study |
| Dea√±o, M. D. and Alfonso, S. and Das, J. P. | 2015 | Program of arithmetic improvement by means of cognitive enhancement: An intervention in children with special educational needs |
| DeAndrea, David C. | 2015 | Testing the proclaimed affordances of online support groups in a nationally representative sample of adults seeking mental health assistance |
| Dee-Price, Betty-Jean M. | 2021 | From conversation starters in the front yard to talking to God: the sensory ethnography of communication access |
| Deepak, Sunil and Kumar, Jayanth and Ramasamy, Parthipan and Griffo, Giampiero | 2014 | An emancipatory research on CBR and the barriers faced by persons with disabilities |
| Deffew, Andrew and Coughlan, Barry and Burke, Tom and Rogers, Elaine | 2022 | Staff member's views and attitudes to supporting people with an Intellectual Disability: A multi-method investigation of intimate relationships and sexuality |
| Desideri, Lorenzo and Stefanelli, Brunella and Bitelli, Claudio and Roentgen, Uta and Gelderblom, Gert-Jan and de Witte, Luc | 2016 | Satisfaction of users with assistive technology service delivery: An exploratory analysis of experiences of parents of children with physical and multiple disabilities |
| Dew, Angela and et, al | 2019 | ‘I don’t feel like I’m in this on my own’: peer support for mothers of children with intellectual disability and challenging behaviour |
| Dezelar, Sharyn and Lightfoot, Elizabeth | 2021 | Enhancing supports for parents with disabilities: a qualitative inquiry into parent centered planning |
| Dodds, Robin L. and Singer, George H. S. | 2018 | Parent-to-Parent support providers: How recruits are identified |
| Doody, O. | 2012 | Families' views on their relatives with intellectual disability moving from a long-stay psychiatric institution to a community-based intellectual disability service: An Irish context |
| Doody, O. and Slevin, E. and Taggart, L. | 2017 | Activities of Intellectual Disability Clinical Nurse Specialists in Ireland |
| Doody, O. and Slevin, E. and Taggart, L. | 2017 | Focus group interviews examining the contribution of intellectual disability clinical nurse specialists in Ireland |
| Doody, O. and Slevin, E. and Taggart, L. | 2018 | Families' perceptions of the contribution of intellectual disability clinical nurse specialists in Ireland |
| Dratsiou, Ioanna and Metaxa, Maria and Romanopoulou, Evangelia and Dolianiti, Foteini and Spachos, Dimitris and Bamidis, Panagiotis D. | 2021 | Eliminating the gap between the use of assistive technologies and the inclusion of people with intellectual disabilities in leisure activities |
| Drescher, Talya and Chang, Ya-Chih | 2022 | Benefits of collaborative teaching models in teacher education programs: Sharing disability knowledge and promoting inclusion |
| Dreyfus, Shoshana and Dowse, Leanne | 2020 | Experiences of parents who support a family member with intellectual disability and challenging behaviour: ‘This is what I deal with every single day’ |
| Duncan, A. and Risley, S. and Combs, A. and Lacey, H. M. and Hamik, E. and Fershtman, C. and Kneeskern, E. and Patel, M. and Crosby, L. and Hood, A. M. and Zoromski, A. K. and Tamm, L. | 2022 | School Challenges and Services Related to Executive Functioning for Fully Included Middle Schoolers With Autism |
| Dvorsky, Melissa R. and Friedman, Lauren M. and Spiess, Madeline and Pfiffner, Linda J. | 2021 | Patterns of Parental Adherence and the Association to Child and Parenting Outcomes Following a Multicomponent School-Home Intervention for Youth With ADHD |
| Eapen, Valsamma and Woolfenden, Susan and Williams, Katrina and Jalaludin, Bin and Dissanayake, Cheryl and Axelsson, Emma L. and Murphy, Elisabeth and Eastwood, John and Descallar, Joseph and Beasley, Deborah and Crncec, Rudi and Short, Katherine and Silove, Natalie and Einfeld, Stewart and Prior, Margot and ƒårnƒçec, Rudi | 2014 | "Are you available for the next 18 months?" - methods and aims of a longitudinal birth cohort study investigating a universal developmental surveillance program: the 'Watch Me Grow' study |
| Egilson, S. T. | 2015 | User perspectives on support services to disabled children and their families |
| Einfeld, S. L. and Beaumont, R. and Clark, T. and Clarke, K. S. and Costley, D. and Gray, K. M. and Horstead, S. K. and Redoblado Hodge, M. A. and Roberts, J. and Sofronoff, K. and Taffe, J. R. and Howlin, P. | 2018 | School-based social skills training for young people with autism spectrum disorders |
| Elliott, K. and Vears, D. F. and Sung, V. and Poulakis, Z. | 2022 | Exploring Parent Support Needs during the Newborn Hearing Diagnosis Pathway |
| Engevik, L. I. and N√¶ss, K. A. B. and Berntsen, L. | 2018 | Quality of Inclusion and Related Predictors: Teachers’ Reports of Educational Provisions Offered to Students with Down Syndrome |
| Englander, H. and Mahoney, S. and Brandt, K. and Brown, J. and Dorfman, C. and Nydahl, A. and Weimer, M. and Gregg, J. | 2019 | Tools to Support Hospital-Based Addiction Care: Core Components, Values, and Activities of the Improving Addiction Care Team |
| Ennis, Stephanie K. and Rivara, Frederick P. and Mangione-Smith, Rita and Konodi, Mark A. and MacKenzie, Ellen J. and Jaffe, Kenneth M. | 2013 | Variations in the quality of inpatient rehabilitation care to facilitate school re-entry and cognitive and communication function for children with TBI |
| Falkmer, T. and Anderson, K. and Falkmer, M. and Horlin, C. | 2013 | Diagnostic procedures in autism spectrum disorders: A systematic literature review |
| Fareo, D. O. | 2015 | Counselling Intervention and Support Programmes for Families of Children with Special Educational Needs |
| Fasching, H. | 2014 | Career counselling at school for placement in sheltered workshops? |
| Fellin, Melissa and King, Gillian and Esses, Victoria and Lindsay, Sally and Klassen, Anne | 2013 | Barriers and facilitators to health and social service access and utilization for immigrant parents raising a child with a physical disability |
| Fenton, Angela and McFarland-Piazza, Laura | 2014 | Supporting Early Childhood Preservice Teachers in Their Work With Children and Families With Complex Needs: A Strengths Approach |
| Feuerstein, J. L. and Olswang, L. B. and Greenslade, K. J. and Dowden, P. and Pinder, G. L. and Madden, J. | 2018 | Implementation Research: Embracing Practitioners' Views |
| First, Jennifer M. and et, al | 2019 | Youth perceptions of stress and coping when transitioning to adulthood with autism: a photovoice study |
| Fleming, Padraic and McGilloway, Sinead and Barry, Sarah | 2016 | The successes and challenges of implementing individualised funding and supports for disabled people: an Irish perspective |
| Flynn, Susan | 2021 | Convergent identities, compounded risk: intersectionality and parenting capacity assessment for disabled children |
| Flynn, Susan | 2021 | Towards parity in protection: Barriers to effective child protection and welfare assessment with disabled children in the Republic of Ireland |
| Flynn, Susan and McGregor, Caroline | 2017 | Disabled children and child protection: learning from literature through a non-tragedy lens |
| Foorman, B. R. and Francis, D. J. and Winikates, D. | 2021 | Early interventions for children with reading disabilities |
| Friedman, C. and Rizzolo, M. C. and Spassiani, N. A. | 2019 | Self-management of health by people with intellectual and developmental disabilities |
| Friend, A. J. and Corker, S. | 2018 | Enhanced milieu training does not confer additional benefit over standard community interventions for toddlers with language delay |
| Furlong, Lisa and Serry, Tanya and Erickson, Shane and Morris, Meg E. | 2018 | Processes and challenges in clinical decision-making for children with speech / sound disorders |
| Fylkesnes, Ingunn | 2021 | Institutional talk and practices: a journey into small group-homes for intellectually disabled children |
| Gale, Elaine and Berke, Michele and Benedict, Beth and Olson, Stephanie and Putz, Karen and Yoshinaga-Itano, Christie | 2021 | Deaf adults in early intervention programs |
| Gallagher, A. L. and Murphy, C. A. and Conway, P. F. and Perry, A. | 2021 | Establishing premises for inter-professional collaborative practice in school: inclusion, difference and influence |
| Garc√≠a-Carri√≥n, R. and Rold√°n, S. Molina | 2018 | Interactive learning environments for the educational improvement of students with disabilities in special schools |
| Gathright, M. M. and Holmes, K. J. and Morris, E. M. and Gatlin, A. | 2016 | An Innovative, Interdisciplinary Model of Care for Inpatient Child Psychiatry: an Overview |
| Gauthier‚ÄêBoudreault, Camille and Couture, M√©lanie and Gallagher, Frances | 2018 | How to facilitate transition to adulthood? Innovative solutions from parents of young adults with profound intellectual disability |
| Gearing, R. E. and Brewer, K. B. and Mian, I. and Moore, K. and Fisher, P. and Hamilton, J. and Mandiberg, J. | 2018 | First-episode psychosis: Ongoing mental health service utilization during the stable period for adolescents |
| Gelech, Jan and Desjardins, Michel and Matthews, Elise and Graumans, Raissa | 2017 | Why do working relationships not change? The need for a new approach to disability partnership research and social change |
| Georgiadi, Maria and et, al | 2012 | Young children's attitudes toward peers with intellectual disabilities: effect of the type of school |
| Giannikas, Christina Nicole and Kambanaros, Maria and Theodorou, Elena | 2021 | English foreign language teachers' awareness of childhood language impairment |
| Gidding, L. G. and Spigt, M. G. and Dinant, G. J. | 2017 | Patients with psychological ICPC codes in primary care; a case-control study investigating the decade before presenting with problems |
| Gilson, Kim‚ÄêMichelle and Davis, Elise and Gains, Joan and Brunton, Susan and Williams, Katrina and Reddihough, Dinah | 2021 | Experiences and barriers to accessing mental health support in mothers of children with a disability |
| Gilson, Kim‚ÄêMichelle and Johnson, Shae and Davis, Elise and Brunton, Susan and Swift, Elena and Reddihough, Dinah and Williams, Katrina | 2018 | Supporting the mental health of mothers of children with a disability: Health professional perceptions of need, role, and challenges |
| Gorjy, Rebecca Soraya and Fielding, Angela and Falkmer, Marita | 2017 | ‘It’s better than it used to be’: Perspectives of adolescent siblings of children with an autism spectrum condition |
| Graham, Fiona and Boland, Pauline and Ziviani, Jenny and Rodger, Sylvia | 2018 | Occupational therapists’ and physiotherapists’ perceptions of implementing Occupational Performance Coaching |
| Graham, L. J. | 2015 | A little learning is a dangerous thing: Factors influencing the increased dentification of Special Educational Needs from the Perspective of Education Policy-makers and School Practitioners |
| Granberg, A. and Olsson, V. and Mattsson Sydner, Y. | 2017 | Teaching and learning cooking skills in Home Economics: What do teachers for students with mild intellectual disabilities consider important to learn? |
| Grandisson, Marie and T√âTreault, Sylvie and Freeman, Andrew R. | 2012 | Enabling integration in sports for adolescents with intellectual disabilities |
| Green, J. and Leadbitter, K. and Ainsworth, J. and Bucci, S. | 2022 | An integrated early care pathway for autism |
| Greenwood, J. and Kelly, C. | 2017 | Implementing cycles of Assess, Plan, Do, Review: a literature review of practitioner perspectives |
| Grimstvedt, Thea Nygaard and Miller, Jeanette Ullmann and van Walsem, Marleen Regina and Feragen, Kristin J. Billaud | 2021 | Speech and language difficulties in Huntington's disease: A qualitative study of patients' and professional caregivers' experiences |
| Guevara, J. P. and Power, T. J. and Bevans, K. and Snitzer, L. and Leavy, S. and Stewart, D. and Broomfield, C. and Shah, S. and Grundmeier, R. and Michel, J. J. and Berkowitz, S. and Blum, N. J. and Bryan, M. and Griffis, H. and Fiks, A. G. | 2021 | Improving Care Management in Attention-Deficit/Hyperactivity Disorder: An RCT |
| Gyimah, E. K. and Amoako, R. | 2016 | Pre-Service Teachers' Perceptions on Procedures to Identify and Assess Children with Special Educational Needs and Disabilities: The Case of Tutors of Colleges of ‚Ä¶ |
| Hackett, Christina L. and Mulvale, Gillian and Miatello, Ashleigh | 2018 | Co-designing for quality: Creating a user-driven tool to improve quality in youth mental health services |
| Hall, Allison and et, al | 2014 | Knowledge translation in job development: strategies for involving families |
| Hall, Sarah A. | 2017 | Community involvement of young adults with intellectual disabilities: their experiences and perspectives on inclusion |
| Hameed, Usman and Dellasega, Cheryl and Scandinaro, Anna | 2020 | Assessment of irritability in school-aged children by pediatric, family practice, and psychiatric providers |
| Harris, Jill F. and Gorman, Leigh P. and Doshi, Aditi and Swope, Shannon and Page, Shayleigh D. | 2021 | Development and implementation of health care transition resources for youth with autism spectrum disorders within a primary care medical home |
| Hastrup, L. H. and Kronborg, C. and Bertelsen, M. and Jeppesen, P. and Jorgensen, P. and Petersen, L. and Thorup, A. and Simonsen, E. and Nordentoft, M. | 2013 | Cost-effectiveness of early intervention in first-episode psychosis: economic evaluation of a randomised controlled trial (the OPUS study) |
| Hauschild, Jennifer L. and Rainchuso, Lori and Boyd, Linda D. and Smallidge, Dianne | 2019 | The experiences of caregivers when seeking and/or receiving oral health care for their child with autism |
| Hawke, Lisa D. and Thabane, Lehana and Wilkins, Leanne and Mathias, Steve and Iyer, Srividya and Henderson, Joanna | 2021 | Don't Forget the Caregivers! A Discrete Choice Experiment Examining Caregiver Views of Integrated Youth Services |
| Healy, S. and Msetfi, R. and Gallagher, S. | 2013 | 'Happy and a bit nervous': The experiences of children with autism in physical education |
| Hedley, Darren and Uljareviƒá, Mirko and Cameron, Lauren and Halder, Santoshi and Richdale, Amanda and Dissanayake, Cheryl | 2017 | Employment programmes and interventions targeting adults with autism spectrum disorder: A systematic review of the literature |
| Heideveld-Gerritsen, Mari√´lle and van Vulpen, Maartje and Hollander, Martine and Oude Maatman, Sabine and Ockhuijsen, Henrietta and van den Hoogen, Agnes | 2021 | Maternity care experiences of women with physical disabilities: A systematic review |
| Hellblom-Thibblin, T. and Klang, N. and √Öman, K. | 2012 | Biopsychosocial model and the ICF-CY in in-service training: General educators' reflections |
| Hemsley, B. and Lee, S. and Munro, K. and Seedat, N. and Bastock, K. and Davidson, B. | 2014 | Supporting communication for children with cerebral palsy in hospital: views of community and hospital staff |
| Hester, L. and O'Doherty, L. J. and Schnittger, R. and Skelly, N. and O'Donnell, M. and Butterly, L. and Browne, R. and Frorath, C. and Morgan, C. and McLoughlin, D. M. and Fearon, P. | 2015 | SEQUenCE: a service user-centred quality of care instrument for mental health services |
| Heyder, A. and S√ºdkamp, A. and Steinmayr, R. | 2020 | How are teachers' attitudes toward inclusion related to the social-emotional school experiences of students with and without special educational needs? |
| Hill, Katharine and Koester, Shannon | 2015 | An examination of the impact of permanency on young adults' special education experiences |
| Hill, Katharine and Moore, Fintan | 2015 | The postadoption needs of adoptive parents of children with disabilities |
| Hillman, J. L. and Wentzel, M. C. and Anderson, C. M. | 2017 | Grandparents' Experience of Autism Spectrum Disorder: Identifying Primary Themes and Needs |
| Holttum, S. | 2015 | School inclusion for children with mental health difficulties |
| Hunter, William C. | 2017 | Literacy workshops: school social workers enhancing educational connections between educators, early childhood students, and families |
| Hurtubise, K. and Brousselle, A. and Noel, M. and Jordan, A. and White, J. and Rasic, N. and Camden, C. | 2021 | Youth and parent perceptions on participating in specialized multidisciplinary pain rehabilitation options: A qualitative timeline effect analysis |
| Irish, D. E. and Lyman, D. M. and Squillace, H. A. and Geyer, E. M. and Cosgrove, T. D. and Hagzan, A. and Leinung, J. and Tosh, T. | 2015 | Educating K-12 Professionals and Parents: Finding Health Information for Special Needs Children<sup>.</sup> |
| Ivory, Niall | 2019 | Social care workers’ experiences of supporting the mental health needs of young people with hearing difficulties |
| Jansen, S. L. G. and Putten, A. A. J. Van der | 2013 | What parents find important in the support of a child with profound intellectual and multiple disabilities |
| John, Aesha | 2020 | Professionals' perspectives on partnering with families of individuals with ID |
| Johnson, Kaprea F. and Belcher, T'Airra W. and Zimmerman, Betsy and Franklin, Jeanel | 2020 | Interprofessional partnerships involving school counsellors for children with special needs: a broad based systematic review using the PRISMA framework |
| Kaale, Anett and Smith, Lars and Sponheim, Eili | 2012 | A randomized controlled trial of preschool-based joint attention intervention for children with autism |
| Kanae, Matsushima and Toshihiro, Kato | 2015 | Research on Positive Indicators for Teacher-Child Relationship in Children with Intellectual Disabilities |
| Karlsson, Petra and Johnston, Christine and Barker, Katrina | 2018 | Influences on students’ assistive technology use at school: the views of classroom teachers, allied health professionals, students with cerebral palsy and their parents |
| Karvonen, M. and Clark, A. K. and Carlson, C. and Wells Moreaux, S. and Burnes, J. | 2021 | Approaches to Identification and Instruction for Students with Significant Cognitive Disabilities Who Are English Learners |
| Keating, S. and O'Connor, U. | 2012 | The shifting role of the special needs assistant in Irish classrooms: A time for change? |
| Kelleher, Joanne and McAuliffe, Eilish | 2012 | Developing clinical governance in a service for people with intellectual disabilities: an action research approach |
| Kenny, Antonia and Power, Martin | 2018 | Social inclusion and intellectual disability in Ireland: Social inclusion co-coordinator’s perspectives on barriers and opportunities |
| Kes√§l√§inen, J. and Suhonen, E. and Saha, M. | 2022 | Children's stress activation in integrated early childhood special education and its connections to special educational needs and temperament |
| Kilinc, S. and Farrand, K. and Chapman, K. and Kelley, M. and Millinger, J. and Adams, K. | 2017 | Expanding opportunities to learn to support inclusive education through drama-enhanced literacy practices |
| Kim, B. Y. and Park, S. A. and Song, J. E. and Son, K. C. | 2012 | Horticultural therapy program for the improvement of attention and sociality in children with intellectual disabilities |
| Kindzierski, Corinne M. and O'Dell, Robin and Marable, Michele A. and Raimondi, Sharon L. | 2013 | You tell us: how well are we preparing teachers for a career in classrooms serving children with emotional disabilities? |
| King, M. and Shields, N. and Imms, C. and Black, M. | 2013 | Participation of children with intellectual disability compared with typically developing children |
| Kingsnorth, S. and Lacombe-Duncan, A. and Keilty, K. and Bruce-Barrett, C. and Cohen, E. | 2015 | Inter-organizational partnership for children with medical complexity: the integrated complex care model |
| Koller, D. and Pouesard, M. L. and Rummens, J. A. | 2018 | Defining social inclusion for children with disabilities: A critical literature review |
| Kov√°cs, K. | 2014 | Integrated Education of Children with Special Educational Needs |
| Kozlowska, Kasia and Chudleigh, Catherine and Cruz, Catherine and Lim, Melissa and McClure, Georgia and Savage, Blanche and Shah, Ubaid and Cook, Averil and Scher, Stephen and Carrive, Pascal and Gill, Deepak | 2018 | Psychogenic non-epileptic seizures in children and adolescents: Part II - Explanations to families, treatment, and group outcomes |
| Kramer-Roy, Debbie | 2012 | Supporting ethnic minority families with disabled children: learning from Pakistani families |
| Kramer, Jessica M. and et, al | 2018 | Feasibility of electronic peer mentoring for transition-age youth and young adults with intellectual and developmental disabilities: project teens making environment and activity modifications |
| Kraska, J. and Boyle, C. | 2014 | Attitudes of preschool and primary school pre-service teachers towards inclusive education |
| Kurniawati, F. and Boer, A. A. De and Minnaert, A. | 2017 | Evaluating the effect of a teacher training programme on the primary teachers' attitudes, knowledge and teaching strategies regarding special educational needs |
| Kuronja, Maja and ƒåagran, Branka and Krajnc, Majda Schmidt | 2019 | Teachers' sense of efficacy in their work with pupils with learning, emotional and behavioural difficulties |
| Kuutti, T. and Sajaniemi, N. and Bj√∂rn, P. M. | 2022 | Participation, involvement and peer relationships in children with special educational needs in early childhood education |
| Leahy, Dorothy and Schaffalitzky, Elisabeth and Armstrong, Claire and Bury, Gerard and Cussen-Murphy, Paula and Davis, Rachel and Dooley, Barbara and Gavin, Blanaid and Keane, Rory and Keenan, Eamon and Latham, Linda and Meagher, David and McGorry, Pat and McNicholas, Fiona and O'Connor, Ray and O'Dea, Ellen and O'Keane, Veronica and O'Toole, Tom P. and Reilly, Edel and Ryan, Patrick | 2013 | Primary care and youth mental health in Ireland: qualitative study in deprived urban areas |
| Leal Rocha, Lyana and de Lima Saintrain, Maria Vieira and Fernandes Vieira-Meyer, Anya Pimentel Gomes | 2015 | Access to dental public services by disabled persons |
| Lebeer, Jo and Birta-Sz√©kely, No√©mi and Demeter, K√°rmen and Boh√°cs, Krisztina and Candeias, Adelinda Araujo and S√∏nnesyn, Gunvor and Partanen, Petri and Dawson, Lorna | 2012 | Re-assessing the current assessment practice of children with special education needs in Europe |
| Lee, Chung eun and Burke, Meghan M. and DaWalt, Leann Smith and Li, Chak and Taylor, Julie Lounds | 2022 | The role of parental advocacy in addressing service disparities for transition-aged youth on the autism spectrum |
| LeGrow, Karen and Cohen, Eyal and Espin, Sherry | 2022 | Mother-nurse decision making practices for children with complex health care needs receiving homecare services: A qualitative descriptive study |
| Liasidou, A. and Ioannidou, E. | 2021 | Disability-related bullying and its discursive formations and enactments in the social ecology of schooling |
| Lindsay, Sally and Duncanson, Michelle and Niles-Campbell, Nadia and McDougall, Carolyn and Diederichs, Sara and Menna-Dack, Dolly | 2018 | Applying an ecological framework to understand transition pathways to post-secondary education for youth with physical disabilities |
| Locke, Jill and Beidas, Rinad S. and Marcus, Steven and Stahmer, Aubyn and Aarons, Gregory A. and Lyon, Aaron R. and Cannuscio, Carolyn and Barg, Frances and Dorsey, Shannon and Mandell, David S. | 2016 | A mixed methods study of individual and organizational factors that affect implementation of interventions for children with autism in public schools |
| Love, H. R. and Zagona, A. L. and Kurth, J. A. and Miller, A. L. | 2017 | Parents' experiences in educational decision making for children and youth with disabilities |
| Major, Samantha and Campbell, Kathleen and Espinosa, Steven and Baker, Jeffrey P. and Carpenter, Kimberly L. H. and Sapiro, Guillermo and Vermeer, Saritha and Dawson, Geraldine | 2020 | Impact of a digital Modified Checklist for Autism in Toddlers: Revised on likelihood and age of autism diagnosis and referral for developmental evaluation |
| Marshall, J. and Tanner, J. P. and Kozyr, Y. A. and Kirby, R. S. | 2015 | Services and supports for young children with Down syndrome: parent and provider perspectives |
| Marteney, T. and Bernadowski, C. | 2016 | Teachers' perceptions of the benefits of online instruction for students with special educational needs |
| Mawdsley, Helena P. and Hauser-Cram, Penny and Helena, P. Mawdsley and Penny, Hauser-Cram | 2013 | Mothers of young children with disabilities: perceived benefits and worries about preschool |
| Mazurek, Micah O. and Stobbe, Gary and Loftin, Rachel and Malow, Beth A. and Agrawal, Mavara M. and Tapia, Mark and Hess, Amy and Farmer, Justin and Cheak-Zamora, Nancy and Kuhlthau, Karen and Sohl, Kristin | 2020 | ECHO Autism Transition: Enhancing healthcare for adolescents and young adults with autism spectrum disorder |
| McClain, M. B. and Shahidullah, J. D. and Mezher, K. R. and Haverkamp, C. R. and Benallie, K. J. and Schwartz, S. E. | 2020 | School-Clinic Care Coordination for Youth with ASD: A National Survey of School Psychologists |
| McCoy, S. and Banks, J. | 2012 | Simply academic? Why children with special educational needs don't like school |
| McCoy, S. and Shevlin, M. and Rose, R. | 2020 | Secondary school transition for students with special educational needs in Ireland |
| McKenna, John William and Brigham, Frederick and Garwood, Justin and Zurawski, Lindsay and Koc, Murat and Lavin, Carlos and Werunga, Robai | 2021 | A systematic review of intervention studies for young children with emotional and behavioral disorders: identifying the research base |
| Meadan, H. and Daczewitz, M. E. | 2015 | Internet-based intervention training for parents of young children with disabilities: A promising service-delivery model |
| Meadows, Denis and Davies, Michael and Beamish, Wendi | 2014 | Teacher Control over Interagency Collaboration: A Roadblock for Effective Transitioning of Youth with Disabilities |
| Miller, Rebecca and Tumin, Dmitry and Hayes, Don and Uffman, Joshua C. and Raman, Vidya T. and Tobias, Joseph D. | 2019 | Unmet Need for Care Coordination Among Children with Special Health Care Needs |
| Missiuna, C. and Pollock, N. and Campbell, W. and Decola, C. and Hecimovich, C. and Sahagian Whalen, S. and Siemon, J. and Song, K. and Gaines, R. and Bennett, S. and McCauley, D. and Stewart, D. and Cairney, J. and Dix, L. and Camden, C. | 2017 | Using an innovative model of service delivery to identify children who are struggling in school |
| Missiuna, C. and Pollock, N. and Campbell, W. N. and Bennett, S. and Hecimovich, C. and Gaines, R. and DeCola, C. and Cairney, J. and Russell, D. and Molinaro, E. | 2012 | Use of the Medical Research Council Framework to develop a complex intervention in pediatric occupational therapy: Assessing feasibility |
| Mulvale, G. M. and Nguyen, T. D. and Miatello, A. M. and Embrett, M. G. and Wakefield, P. A. and Randall, G. E. | 2019 | Lost in transition or translation? Care philosophies and transitions between child and youth and adult mental health services: a systematic review |
| Munoz, K. and Kibbe, K. and Preston, E. and Caballero, A. and Nelson, L. and White, K. and Twohig, M. | 2017 | Paediatric hearing aid management: a demonstration project for using virtual visits to enhance parent support |
| Nemiro, Ashley and Hijazi, Zeinab and O'Connell, Ruth and Coetzee, April and Snider, Leslie | 2022 | Mental health and psychosocial wellbeing in education: The case to integrate core actions and interventions into learning environments |
| Nickbakht, Mansoureh and et, al | 2019 | A qualitative investigation of families' needs in the transition to early intervention after diagnosis of hearing loss |
| Nijakowska, J. | 2019 | Foreign language teachers' preparedness to cater for special educational needs of learners with dyslexia: a conceptual framework |
| Nilsen, S. | 2017 | Special education and general education‚ coordinated or separated? A study of curriculum planning for pupils with special educational needs |
| Nilsen, S. | 2020 | Inside but still on the outside? Teachers' experiences with the inclusion of pupils with special educational needs in general education |
| Northman, L. and Morris, M. and Loucas, C. and Ross, S. and Muriel, A. C. and Guo, D. and London, W. B. and Manley, P. and Ullrich, N. J. | 2018 | The Effectiveness of a Hospital-Based School Liaison Program: A Comparative Study of Parental Perception of School Supports for Children With Pediatric Cancer and Neurofibromatosis Type 1 |
| Ojeda-Castelo, J. J. and Piedra-Fernandez, J. A. | 2018 | KiNEEt: application for learning and rehabilitation in special educational needs |
| Patton, S. and Hutton, E. and MacCobb, S. | 2015 | Curriculum differentiation for handwriting and occupational therapy/teacher partnership: collaboration or conflict? |
| Patton, Sandra and Hutton, Eve | 2016 | Parents' perspectives on a collaborative approach to the application of the Handwriting Without Tears - A programme with children with Down syndrome |
| Peters, Vincent J. T. and Bok, Levinus A. and de Beer, Lieke and van Rooij, Joyce J. M. and Meijboom, Bert R. and Bunt, Jan Erik H. | 2022 | Destination unknown: Parents and healthcare professionals' perspectives on transition from paediatric to adult care in Down syndrome |
| Pickard, Katherine and Meyer, Allison and Reyes, Nuri and Tanda, Tanea and Reaven, Judy | 2022 | Using evaluative frameworks to examine the implementation outcomes of a cognitive behavioral therapy program for autistic students with anxiety within public school settings |
| Pidano, A. E. and Arora, P. and Gipson, P. Y. and Hudson, B. O. and Schellinger, K. B. | 2018 | Psychologists and Pediatricians in the Primary Care Sandbox: Communication is Key to Cooperative Play |
| Poirier, Sarah-√àve and St-Pierre, Marie-Catherine and Julien-Gauthier, Francine and Flamand, V√©ronique and Martin-Roy, Sarah and Desmarais, Chantal | 2022 | Inter-Agency Collaboration in the Transition from School to Adulthood of Students with Disabilities: A Narrative Review of the Literature |
| Puig, V. I. | 2012 | Cultural and linguistic alchemy: Mining the resources of Spanish-speaking children and families receiving early intervention services |
| Quest, A. Del and et, al | 2012 | Voices of youth in foster care and special education regarding their educational experiences and transition to adulthood |
| Rezaei, Amin and Raji, Parvin and Mousavi, Seyedeh Tahmineh and Mahmoodian, Mahmoud and Baghestani, Ahmad Reza | 2022 | Study of environmental factors and quality of life in children with cerebral palsy based on international classification of functioning, disability and health |
| Richards, K. A. R. and Eberline, A. D. | 2015 | Experiential learning through a physical activity program for children with disabilities |
| Riggs, S. E. and Garrett, M. and Arnold, K. and Colon, E. and Feldman, E. N. and Huangthaisong, P. and Hyacinthe, B. and Indelicato, H. A. and Lee, E. | 2016 | Can Frontline Clinicians in Public Psychiatry Settings Provide Effective Psychotherapy For Psychosis? |
| Robert, M. and Leblanc, L. and Boyer, T. | 2015 | When satisfaction is not directly related to the support services received: Understanding parents' varied experiences with specialised services for children with developmental disabilities |
| Robinson, Sally and Valentine, Kylie and Idle, Jan | 2021 | Disability and family violence prevention: a case study on participation in evidence making |
| Rose, R. and Shevlin, M. | 2020 | Support provision for students with Special Educational Needs in Irish Primary Schools |
| Ryan, Christian and Quinlan, Elizabeth | 2018 | Whoever shouts the loudest: Listening to parents of children with disabilities |
| Sanches-Ferreira, M. and Lopes-dos-Santos, P. | 2013 | How individualised are the individualised education programmes (IEPs): An analysis of the contents and quality of the IEPs goals |
| Scanlon, G. and Doyle, A. | 2021 | Transition stories: Voices of school leavers with intellectual disabilities |
| Schmidt, Elizabeth K. and Beining, April and Hand, Brittany N. and Havercamp, Susan and Darragh, Amy | 2022 | Healthcare providers' role in providing sexual and reproductive health information to people with intellectual and developmental disabilities: A qualitative study |
| Shani, M. and Hebel, O. | 2016 | Educating towards Inclusive Education: Assessing a Teacher-Training Program for Working with Pupils with Special Educational Needs and Disabilities (SEND) |
| Shevlin, M. and Winter, E. and Rose, R. and O'Raw, P. | 2013 | Investigating perceptions of the assessment process for pupils with special educational needs within an Irish context |
| Shivers, Carolyn M. and Sonnier‚ÄêNetto, Libbie and Lee, Gloria K. | 2019 | Needs and experiences of family caregivers of individuals with autism spectrum disorders across the lifespan |
| Shovlin, Amanda and Flynn, Michael and Louw, Julia and Doyle, Carmel | 2020 | Implementing blended feeding for children with intellectual disabilities in a school environment |
| Siddiqua, A. and Janus, M. | 2017 | Experiences of parents of children with special needs at school entry: a mixed method approach |
| Silveira-Maia, M. and Lopes-dos-Santos, P. | 2019 | The international classification of functioning, disability and health in an interactive perspective: the assessment and intervention of students' additional support needs |
| Simacek, J. and Dimian, A. F. and McComas, J. J. | 2017 | Communication intervention for young children with severe neurodevelopmental disabilities via telehealth |
| Simons, L. E. and Sieberg, C. B. and Pielech, M. | 2013 | What does it take? Comparing intensive rehabilitation to outpatient treatment for children with significant pain-related disability |
| Skagestad, Linn Julie and √òstensj√∏, Sigrid and Ulvik, Oddbj√∏rg Skj√¶r | 2021 | Collaborations between young people living with bodily impairments and their multiprofessional teams: The relational dynamics of participation and power |
| Soenen, S. and van Berckelaer-Onnes, I. and Scholte, E. | 2016 | A comparison of support for two groups of young adults with mild intellectual disability |
| Soper, Alice Kelen and Cross, Andrea and Rosenbaum, Peter and Gorter, Jan Willem | 2021 | Knowledge translation strategies to support service providers' implementation of the "F-words in Childhood Disability" |
| Srsen, Katja Groleger and Vidmar, Gaj and Socan, Gregor and Zupan, Anton | 2014 | Parental evaluation of processes of care in relation to the child, parent and family characteristics |
| Srsen, Katja Groleger | 2018 | Evalutation of processes of care in a rehabilitation program for children with disability and evaluation of some impact factors |
| Stadnick, Nicole A. and Meza, Rosemary D. and Suhrheinrich, Jessica and Aarons, Gregory A. and Brookman-Frazee, Lauren and Lyon, Aaron R. and Mandell, David S. and Locke, Jill | 2019 | Leadership profiles associated with the implementation of behavioral health evidence-based practices for autism spectrum disorder in schools |
| Stainbrook, J. Alacia and Weitlauf, Amy S. and Ju√°rez, A. Pablo and Taylor, Julie Lounds and Hine, Jeffrey and Broderick, Neill and Nicholson, Amy and Warren, Zachary | 2019 | Measuring the service system impact of a novel telediagnostic service program for young children with autism spectrum disorder |
| Suhrheinrich, Jessica and Melgarejo, Melina and Root, Brittney and Aarons, Gregory A. and Brookman-Frazee, Lauren | 2021 | Implementation of school-based services for students with autism: Barriers and facilitators across urban and rural districts and phases of implementation |
| Svensson, B. and Eriksson, U. B. | 2013 | Exploring risk for abuse of children with chronic conditions or disabilities: A parent's perceptions of stressors and the role of professionals |
| Tindall, D. and MacDonald, W. and Carroll, E. | 2015 | Pre-service teachers' attitudes towards children with disabilities: An Irish perspective |
| Tindall, D. W. and Culhane, M. and Foley, J. T. | 2016 | Pre-service teachers' self-efficacy towards children with disabilities: An Irish perspective |
| Trowbridge, Kelly and Mische-Lawson, Lisa | 2014 | Families with children with medical complexity and self-management of care: a systematic review of the literature |
| Turnbull, R. and Turnbull, A. | 2015 | Looking backward and framing the future for parents' aspirations for their children with disabilities |
| Tzivinikou, S. and Papoutsaki, K. | 2016 | Studying teaching methods, strategies and best practices for young children with special educational needs |
| van den Driessen Mareeuw, Francine A. and Coppus, Antonia M. W. and Delnoij, Diana M. J. and de Vries, Esther | 2018 | Healthcare quality for people with Down Syndrome: the patient perspective |
| van den Driessen Mareeuw, Francine and Coppus, Antonia and Delnoij, Diana and de Vries, Esther | 2019 | Defining clinically relevant quality indicators that matter to people with Down syndrome |
| Van, D. E. N. Steene Helena and Van, West Dirk and Glazemakers, Inge | 2018 | A multi-perspective exploration of the service needs of adolescent girls with multiple and complex needs |
| Van, D. E. N. Steene Helena and Van, West Dirk and Glazemakers, Inge | 2019 | Collaboration between Child and Adolescent Psychiatry and Child Welfare for adolescent girls with multiple and complex needs: an evaluation by adolescents, (step)parents, and professionals |
| Vanclooster, Stephanie and Van Hoeck, Katelijne and Peremans, Lieve and Bilsen, Johan and Van Der Werff Ten Bosch, Jutte and Laureys, Genevi√®ve and Paquier, Philippe and Jansen, Anna | 2021 | Reintegration into school of childhood brain tumor survivors: a qualitative study using the International Classification of Functioning, Disability and Health: A Children and Youth framework |
| Varcoe, L. and Boyle, C. | 2014 | Pre-service primary teachers' attitudes towards inclusive education |
| Verhoef, Joan A. C. and Miedema, Harald S. and Van Meeteren, Jetty and Stam, Henk J. and Roebroeck, Marij E. | 2013 | A new intervention to improve work participation of young adults with physical disabilities: a feasibility study |
| Vlachou, A. and Stavroussi, P. | 2016 | Special teachers' educational responses in supporting students with special educational needs (SEN) in the domain of social skills development |
| Vohra, Rini and Madhavan, Suresh and Sambamoorthi, Usha and St Peter, Claire | 2014 | Access to services, quality of care, and family impact for children with autism, other developmental disabilities, and other mental health conditions |
| Vonneilich, N. and L√ºdecke, D. and Kofahl, C. | 2016 | The impact of care on family and health-related quality of life of parents with chronically ill and disabled children |
| Walsh, Matthew A. and Jaggers, Jeremiah W. | 2017 | Addressing the needs crossover youth: what key professionals are saying |
| Wang, W. and Shukla, P. and Shi, G. | 2021 | Digitalized social support in the healthcare environment: Effects of the types and sources of social support on psychological well-being |
| White, M. O. | 2020 | Combining explicit instruction and positive psychology to see adolescents with learning difficulties flourish |
| Whitlow, Darcie and Cooper, Robyn and Couvillon, Michael | 2019 | Voices from those not heard: a case study on the inclusion experience of adolescent girls with emotional‚ behavioral disabilities |
| Wilson, Nathan J. and Frawley, Patsie | 2016 | Transition staff discuss sex education and support for young men and women with intellectual and developmental disability |
| Wright Stein, S. and Alexander, R. and Mann, J. and Schneider, C. and Zhang, S. and Gibson, B. E. and Gabison, S. and Jachyra, P. and Mosleh, D. | 2021 | Understanding disability in healthcare: exploring the perceptions of parents of young people with autism spectrum disorder |
| Wright, Annemarie and Roberts, Rachel and Bowman, Grace and Crettenden, Angela | 2019 | Barriers and facilitators to physical activity participation for children with physical disability: comparing and contrasting the views of children, young people, and their clinicians |
| Yakut, A. D. and Akg√ºl, S. and Tuncer, A. T. | 2020 | Teachers' perceptions of students with additional support needs |
| Yang, T. X. and Allen, R. J. and Holmes, J. and Chan, R. C. K. | 2017 | Impaired memory for instructions in children with attention-deficit hyperactivity disorder is improved by action at presentation and recall |
| Yƒ±lmaz, Medine and Sari, Hatice Yildirim and Co≈üansu, G√ºlhan Kuzu and Nahcivan, Nursen and Akta≈ü, Bet√ºl and Tiraki, Zeliha and Dogruyol, Devrim | 2019 | Health problems of individuals with autism spectrum disorder |
| Yingling, Marissa E. and et, al | 2020 | Community-engaged process to adapt evidence-based programs for parents of children with autism spectrum disorder |
| Young, Elizabeth and Aiyadurai, Ramanan and Jegathesan, Thivia and Brown, Catherine and Bechard, Nicole and Minhas, Ripudaman S. and Dillon, Karen and Maguire, Jonathon | 2019 | Increasing Access to Developmental Services for Children with Autism Spectrum Disorder: The Pediatric Developmental Passport Pilot Randomized Trial |
| Zaidman-Zait, A. and Curle, D. and Jamieson, J. R. | 2015 | Cochlear implantation among deaf children with additional disabilities: Parental perceptions of benefits, challenges, and service provision |
| Zand, Debra H. and et, al | 2018 | A pilot of a brief positive parenting program on children newly diagnosed with autism spectrum disorder |
| Zavaraki, E. Z. and Schneider, D. | 2019 | Blended Learning Approach for Students with Special Educational Needs: A Systematic Review |
| Zhao, Y. and Rose, R. and Shevlin, M. | 2021 | Paraprofessional support in Irish schools: from special needs assistants to inclusion support assistants |
| Zheng, Shuting and Adams, Ryan and Taylor, Julie Lounds and Pezzimenti, Florencia and Bishop, Somer L. | 2021 | Depression in independent young adults on the autism spectrum: Demographic characteristics, service use, and barriers |
| Ziviani, Jenny and et, al | 2012 | Effectiveness of support services for children and young people with challenging behaviours related to or secondary to disability, who are in out-of-home care: a systematic review |
| Zlatarov, P. and Ivanova, G. | 2018 | A conceptual model for user-centered learning environment for integrated education of children with special educational needs |
| Zorn, Jelka and Seelmeyer, Udo | 2017 | Inquiry-based learning about technologies in social work education |
| Zucchella, C. and Di Santis, M. and Ciccone, B. and Pelella, M. and Scappaticci, M. and Badalassi, G. and Lavezzi, S. and Bartolo, M. | 2018 | Is telemonitoring useful for supporting persons with consciousness disorders and caregivers? A preliminary observational study in a real-life population |
| Zuurmond, Maria | 2013 | Understanding the wider needs of children with disabilities |
| **Wrong outcome** | | |
| Abbott, M. and Bernard, P. and Forge, J. | 2013 | Communicating a diagnosis of Autism Spectrum Disorder - a qualitative study of parents' experiences |
| Abdulla, Sam and Brown, Michael and Grung, Rolf Magnus | 2018 | Student experiences of an Erasmus+ project on children and young people with complex intellectual and developmental disabilities |
| Abrams, T. and Abbott, D. and Mistry, B. | 2020 | Ableist constructions of time? Boys and men with Duchenne muscular dystrophy managing the uncertainty of a shorter life |
| Absalom-Hornby, V. and Hare, D. J. and Gooding, P. and Tarrier, N. | 2012 | Attitudes of relatives and staff towards family intervention in forensic services using Q methodology |
| Acker, L. and Knight, M. and Knott, F. | 2018 | ‘Are they just gonna reject me?’ Male adolescents with autism making sense of anxiety: An Interpretative Phenomenological Analysis |
| Adam, E. and Sleeman, K. E. and Brearley, S. and Hunt, K. and Tuffrey-Wijne, I. | 2020 | The palliative care needs of adults with intellectual disabilities and their access to palliative care services: A systematic review |
| Adamou, M. and Graham, K. and MacKeith, J. and Burns, S. and Emerson, L. M. | 2016 | Advancing services for adult ADHD: the development of the ADHD Star as a framework for multidisciplinary interventions |
| Adams, Tracey Marie and Jahoda, Andrew | 2019 | Listening to mothers: experiences of mental health support and insights into adapting therapy for people with severe or profound intellectual disabilities |
| Aggett, P. and Messent, P. and Staines, J. | 2013 | Benign invigilation': using appreciative inquiry to reposition clinical risk in multi-disciplinary CAMH teams |
| Agrawal, D. and Dritsakis, G. and Mahon, M. and Mountjoy, A. and Bamiou, D. E. | 2021 | Experiences of Patients With Auditory Processing Disorder in Getting Support in Health, Education, and Work Settings: Findings From an Online Survey |
| Aguirre Velasco, A. and Cruz, I. S. S. and Billings, J. and Jimenez, M. and Rowe, S. | 2020 | What are the barriers, facilitators and interventions targeting help-seeking behaviours for common mental health problems in adolescents? A systematic review |
| Ahmad, W. | 2012 | Barriers of inclusive education for children with intellectual disability |
| Ahmmed, A. U. | 2020 | Manual dexterity and outcomes in a commonly used test battery to assess auditory processing disorder (APD) in children |
| Ahmmed, A. U. | 2021 | A transdisciplinary protocol evaluating auditory processing disorder (APD) in children using speech and non-speech stimuli and tools for common co-morbidities: time to re-evaluate APD diagnostic criteria |
| Ahmmed, Ansar U. and Asif, Aysha and Winterburn, Samantha | 2022 | Visual Processing Impairment in Children With Suspected Auditory Processing Disorder: A Transdisciplinary Dimensional Approach to Diagnosis |
| Ainsworth, Viki and Ainsworth, Tilly and Blair, Jim | 2021 | How to get care right for people with learning disabilities in the emergency department: ask and engage |
| Akbar, S. and Woods, K. | 2020 | Understanding Pakistani parents’ experience of having a child with special educational needs and disability (SEND) in England |
| Alam, F. and Wright, N. and Roberts, P. and Dhadley, S. and Townley, J. and Webster, R. | 2019 | Optimising opioid substitution therapy in the prison environment |
| Alcorn, A. M. and Ainger, E. and Charisi, V. and Mantinioti, S. and Petroviƒá, S. and Schadenberg, B. R. and Tavassoli, T. and Pellicano, E. | 2019 | Educators' Views on Using Humanoid Robots With Autistic Learners in Special Education Settings in England |
| Alderson, H. and Brown, R. and Copello, A. and Kaner, E. and Tober, G. and Lingam, R. and McGovern, R. | 2019 | The key therapeutic factors needed to deliver behavioural change interventions to decrease risky substance use (drug and alcohol) for looked after children and care leavers: a qualitative exploration with young people, carers and front line workers |
| Alderson, P. | 2018 | How the rights of all school students and teachers are affected by special educational needs or disability (SEND) services: Teaching, psychology, policy |
| Aldiss, Susie and Gibson, Faith and Geoghegan, Sophie and Jewitt, Anna and Elliott, Tara Kerr and Williams, Anna and Wray, Jo and Oulton, Kate | 2021 | 'We don't know what tomorrow will bring': Parents' experiences of caring for a child with an undiagnosed genetic condition |
| Alexander, C. | 2021 | Unequal Conditions of Care and the Implications for Social Policies on Young Carers |
| Alexander, R. and Ravi, A. and Barclay, H. and Sawhney, I. and Chester, V. and Malcolm, V. and Brolly, K. and Mukherji, K. and Zia, A. and Tharian, R. and Howell, A. and Lane, T. and Cooper, V. and Langdon, P. E. | 2020 | Guidance for the Treatment and Management of COVID-19 Among People with Intellectual Disabilities |
| Ali, A. and Scior, K. and Ratti, V. and Strydom, A. and King, M. and Hassiotis, A. | 2013 | Discrimination and other barriers to accessing health care: perspectives of patients with mild and moderate intellectual disability and their carers |
| Ali, Nasreen and McLachlan, Niel and Kanwar, Shama and Randhawa, Gurch | 2017 | Pakistani young people’s views on barriers to accessing mental health services |
| Alkahtani, K. D. | 2013 | Teachers' knowledge and use of assistive technology for students with special educational needs |
| Allan, J. and J√∏rgensen, C. | 2021 | Inclusion, social capital and space within an English secondary free school |
| Allard, J. and Lancaster, S. and Clayton, S. and Amos, T. and Birchwood, M. | 2018 | Carers' and service users' experiences of early intervention in psychosis services: implications for care partnerships |
| Allen-Biddell, D. and Bond, C. | 2022 | What are the experiences and practices of educational psychologists when working with and supporting autistic, gender-diverse children and young people? |
| Allison, C. and Auyeung, B. and Baron-Cohen, S. | 2012 | Toward brief "red flags" for autism screening: The short Autism Spectrum Quotient and the short Quantitative Checklist in 1,000 cases and 3,000 controls |
| Allport, T. and Ambrose, A. and Collin, S. M. | 2022 | Developmental referrals of pre-school children in a diverse community in England: The importance of parental migration for referral rates |
| Amate, J. J. S. and de la Rosa, A. L. and C√°ceres, R. G. and Serrano, A. V. | 2021 | The effects of covid-19 in the learning process of primary school students: A systematic review |
| Amiel Castro, R. T. and Schroeder, K. and Pinard, C. and Blochlinger, P. and Kunzli, H. and Riecher-Rossler, A. and Kammerer, M. | 2015 | Perinatal mental health service provision in Switzerland and in the UK |
| Anders, Yvonne and Sammons, Pam and Taggart, Brenda and Sylva, Kathy and Melhuish, Edward and Siraj‚ÄêBlatchford, Iram | 2011 | The influence of child, family, home factors and pre-school education on the identification of special educational needs at age 10 |
| Andershed, Anna-Karin and Andershed, Henrik | 2015 | Risk and protective factors among preschool children: integrating research and practice |
| Andersson, Kerstin and Bellon, Michelle and Walker, Ruth | 2016 | Parents’ experiences of their child’s return to school following acquired brain injury (ABI): A systematic review of qualitative studies |
| Andrade, L. H. and Alonso, J. and Mneimneh, Z. and Wells, J. E. and Al-Hamzawi, A. and Borges, G. and Bromet, E. and Bruffaerts, R. and de Girolamo, G. and de Graaf, R. and Florescu, S. and Gureje, O. and Hinkov, H. R. and Hu, C. and Huang, Y. and Hwang, I. and Jin, R. and Karam, E. G. and Kovess-Masfety, V. and Levinson, D. and Matschinger, H. and O'Neill, S. and Posada-Villa, J. and Sagar, R. and Sampson, N. A. and Sasu, C. and Stein, D. J. and Takeshima, T. and Viana, M. C. and Xavier, M. and Kessler, R. C. | 2014 | Barriers to mental health treatment: results from the WHO World Mental Health surveys |
| Angriman, M. and Caravale, B. and Novelli, L. and Ferri, R. | 2015 | Sleep in children with neurodevelopmental disabilities |
| Anonymous | 2014 | The healthy child programme review at age 2-2 1/2 and ASQ-3 |
| Arakelyan, Stella and et, al | 2019 | Family factors associated with participation of children with disabilities: a systematic review |
| Arefadib, N. and Cooklin, A. and Nicholson, J. and Shafiei, T. | 2021 | Postnatal depression and anxiety screening and management by maternal and child health nurses in community settings: A scoping review |
| Arellano, Araceli and et, al | 2019 | Parenting sense of competence in mothers of children with autism: associations with parental expectations and levels of family support needs |
| Armstrong, David and Macleod, Gale and Brough, Colin | 2019 | Work Done in the Margins: A Comparative Study of Mental Health Literacy in Pre-Service Teacher Education in Australia and in Scotland |
| Ashley, Laura and Armitage, Gerry and Taylor, Julie | 2017 | Recognising and referring children exposed to domestic abuse: a multi-professional, proactive systems-based evaluation using a modified Failure Mode and Effects Analysis (FMEA) |
| Atkin, K. and Tozer, R. | 2014 | Personalisation, family relationships and autism: Conceptualising the role of adult siblings |
| Atkinson, C. and Bond, C. and Goodhall, N. and Woods, F. | 2017 | Children's access to their right to play: Findings from two exploratory studies |
| Atkinson, Cathy and Squires, Garry and Bragg, Joanna and Wasilewski, David and Muscutt, Janet | 2013 | Effective Delivery of Therapeutic Interventions: Findings from Four Site Visits |
| Atkinson, S. J. and Takriti, R. A. and Elhoweris, H. | 2021 | Teachers’ perceptions of successful transition to school for children with and without Downs Syndrome in the UAE and England |
| Attfield, Kate | 2020 | Triple X supergirls: Their special educational needs and social experience |
| Ayyash, H. and Sankar, S. and Merriman, H. and Vogt, C. and Earl, T. and Shah, K. and Banerjee, S. | 2013 | Multidisciplinary consensus for the development of ADHD services: The way forward |
| Ayyash, H. F. and Ogundele, M. O. and Lynn, R. M. and Schumm, T. S. and Ani, C. | 2021 | Involvement of community paediatricians in the care of children and young people with mental health difficulties in the UK: implications for case ascertainment by child and adolescent psychiatric, and paediatric surveillance systems |
| Ayton, Agnes and Meads, Geoffrey | 2012 | The implementation of the Care Programme Approach in the West Midlands CAMHS: the impact of organisational diversity on patient safety - an extended audit |
| Azorin, C.M.A. | 2016 | Responding to student diversity in the English context: case studies |
| Bacha, K. and Hanley, T. and Winter, L. A. | 2020 | 'Like a human being, I was an equal, I wasn't just a patient': Service users' perspectives on their experiences of relationships with staff in mental health services |
| Baginsky, Mary and Moriarty, Jo and Manthorpe, Jill and Atkinson, H. H. J. Carol | 2020 | New Orleans intervention model: implementing the model and its randomised controlled trial in a London borough |
| Bailey, S. and Baines, E. | 2012 | The impact of risk and resiliency factors on the adjustment of children after the transition from primary to secondary school |
| Baker, D. and Green, L. | 2016 | Perceptions of schooling, pedagogy and notation in the lives of visually-impaired musicians |
| Baker, D. P. | 2021 | Growing up gay in a digital world: A double-edged sword for sexual minority young men in England |
| Baker, E. and Gwernan-Jones, R. and Britten, N. and Cox, M. and McCabe, C. and Retzer, A. and Gill, L. and Plappert, H. and Reilly, S. and Pinfold, V. and Gask, L. and Byng, R. and Birchwood, M. | 2019 | Refining a model of collaborative care for people with a diagnosis of bipolar, schizophrenia or other psychoses in England: a qualitative formative evaluation |
| Baker, H. J. and Hollywood, A. and Waite, P. | 2022 | Adolescents’ lived experience of panic disorder: an interpretative phenomenological analysis |
| Bakopoulou, I. | 2022 | The impact of the COVID-19 pandemic on early years transition to school in the UK context |
| Ballantyne, C. and Wilson, C. and Toye, M. K. and Gillespie-Smith, K. | 2022 | Knowledge and barriers to inclusion of ASC pupils in Scottish mainstream schools: a mixed methods approach |
| Bamidele, Kunle and Hall, Ian | 2013 | The place of medication for challenging behaviour: a whole system perspective |
| Bannon, S. and McGlynn, T. and McKenzie, K. and Quayle, E. | 2015 | The positive role of Internet use for young people with additional support needs: Identity and connectedness |
| Barden, O. | 2012 | "...If we were cavemen we'd be fine": Facebook as a catalyst for critical literacy learning by dyslexic sixth-form students |
| Barker, B. and Mills, C. | 2018 | The psy-disciplines go to school: psychiatric, psychological and psychotherapeutic approaches to inclusion in one UK primary school |
| Barker, Isaac and Steventon, Adam and Williamson, Robert and Deeny, Sarah R. | 2018 | Self-management capability in patients with long-term conditions is associated with reduced healthcare utilisation across a whole health economy: cross-sectional analysis of electronic health records |
| Barlow, A. and Humphrey, N. | 2012 | A natural variation study of engagement and confidence among parents of learners with special educational needs and disabilities (SEND) |
| Barnes, G. L. and Wretham, A. E. and Sedgwick, R. and Boon, G. and Cheesman, K. and Moghraby, O. | 2020 | Evaluation of a diagnostic ADHD pathway in a community child mental health service in South London |
| Barnett, Erin R. and et, al | 2018 | Supporting shared decision-making for children’s complex behavioral problems: development and user testing of an Option Grid decision aid |
| Barratt, M. and Bail, K. and Paterson, C. | 2022 | Children living with long-term conditions and their experiences of partnership in nursing care: An integrative systematic review |
| Barratt, Macey and Bail, Kasia and Paterson, Catherine | 2021 | Children living with long-term conditions: A meta-aggregation of parental experiences of partnership nursing |
| Barretto, Christine and et, al | 2017 | Supports for parents of children with an intellectual disability: the social care worker’s view |
| Barron, Ian and Allardyce, Stuart and Young, Hannah and Levit, Rebecca | 2019 | Exploration of the relationship between severe and complex disabilities and child sexual abuse: A call for relevant research |
| Barry, S. and O'Sullivan, E. A. and Toumba, K. J. | 2014 | Barriers to dental care for children with autism spectrum disorder |
| Bartlett, R. | 2017 | The experience of deaf students in secondary mainstream classrooms |
| Batchelor, Molly and Maguire, Sabine and Shearn, Julia | 2021 | ‘They just get it’: An exploration of father's experiences and perceptions of a support group for men caring for children with disabilities and/or developmental delay |
| Batchelor, R. and Catanzano, M. and Kerry, E. and Bennett, S. D. and Coughtrey, A. E. and Liang, H. and Curry, V. and Heyman, I. and Shafran, R. | 2020 | Debate: Lessons learned in lockdown - a one-day remotely delivered training on low-intensity psychological interventions for common mental health conditions |
| Batchelor, R. and Cribben, H. and MacDonald, P. and Treasure, J. and Cini, E. and Nicholls, D. and Kan, C. | 2022 | The experiential perspectives of siblings and partners caring for a loved one with an eating disorder in the UK |
| Bate, C. and Turner, K. and Fricke, S. | 2021 | Return to school after acquired brain injury in the UK: The educators' perspectives |
| Bates, A. and Forrester-Jones, R. and McCarthy, M. | 2020 | Specialist hospital treatment and care as reported by children with intellectual disabilities and a cleft lip and/or palate, their parents and healthcare professionals |
| Bates, H. and McCafferty, A. and Quayle, E. and McKenzie, K. | 2015 | Review: typically-developing students' views and experiences of inclusive education |
| Bates, J. and Finlay, J. and O‚ÄôConnor Bones, U. | 2021 | ‘Education cannot cease’: the experiences of parents of primary age children (age 4-11) in Northern Ireland during school closures due to COVID-19 |
| Bates, K. and Morgan, H. and Crosby, E. and Nurse, K. and Flynn, A. and Stern, D. and Baronian, R. and Kennedy, E. K. | 2021 | Developing digital approaches for adolescents and young adults with autism and learning disabilities: Tools to facilitate access and shared decision-making |
| Bauer, A. and Wistow, G. and Dixon, J. and Knapp, M. | 2015 | Investing in advocacy for parents with learning disabilities: What is the economic argument? |
| Bavel, Bianca van and Lafferty, Attracta and O'Sullivan, Diarmaid and O'Mahoney, Paul | 2017 | At the interface between formal and informal care: Supporting families caring for a person with Intellectual Disability in Ireland |
| Baverstock, Simon and Wright, Karen | 2015 | Borderline personality disorder in young people: the perspectives of frontline professionals in child and adolescent mental health |
| Beaton, M. C. and Codina, G. N. and Wharton, J. C. | 2021 | Decommissioning normal: COVID-19 as a disruptor of school norms for young people with learning disabilities |
| Beck, G. J. and O‚ÄôConnor-Bones, U. and Gracey, J. and Kelly, G. and Walsh, G. | 2021 | In need of review: Developing Sensory Provision in Northern Ireland’s Mainstream Primary classrooms |
| Bee, P. and Berzins, K. and Calam, R. and Pryjmachuk, S. and Abel, K. M. | 2013 | Defining quality of life in the children of parents with severe mental illness: a preliminary stakeholder-led model |
| Beecham, Jennifer and Sloper, Patricia and Greco, Veronica and Webb, Rosemary | 2007 | The costs of key worker support for disabled children and their families |
| Bejarano-Martin, A. and Canal-Bedia, R. and Magan-Maganto, M. and Fernandez-Alvarez, C. and Cilleros-Martin, M. V. and Sanchez-Gomez, M. C. and Garcia-Primo, P. and Rose-Sweeney, M. and Boilson, A. and Linertova, R. and Roeyers, H. and Van der Paelt, S. and Schendel, D. and Warberg, C. and Cramer, S. and Narzisi, A. and Muratori, F. and Scattoni, M. L. and Moilanen, I. and Yliherva, A. and Saemundsen, E. and Loa Jonsdottir, S. and Efrim-Budisteanu, M. and Arghir, A. and Papuc, S. M. and Vicente, A. and Rasga, C. and Roge, B. and Guillon, Q. and Baduel, S. and Kafka, J. X. and Poustka, L. and Kothgassner, O. D. and Kawa, R. and Pisula, E. and Sellers, T. and Posada de la Paz, M. | 2020 | Early Detection, Diagnosis and Intervention Services for Young Children with Autism Spectrum Disorder in the European Union (ASDEU): Family and Professional Perspectives |
| Bell, L. and Pearce, G. | 2021 | Parents’ experiences of children’s health care for hypermobile Ehlers‚ Danlos syndrome and hypermobility spectrum disorders |
| Bell, S. | 2013 | Professional development for specialist teachers and assessors of students with literacy difficulties/dyslexia: 'To learn how to assess and support children with dyslexia' |
| Bellass, Sue and Lister, Jennie and Kitchen, Charlotte Emma Wray and Kramer, Lyndsey and Alderson, Sarah Louise and Doran, Tim and Gilbody, Simon and Han, Lu and Hewitt, Catherine and Holt, Richard Ian Gregory and Jacobs, Rowena and Prady, Stephanie Louise and Shiers, David and Siddiqi, Najma and Taylor, Johanna | 2021 | Living with diabetes alongside a severe mental illness: A qualitative exploration with people with severe mental illness, family members and healthcare staff |
| Belling, R. and McLaren, S. and Paul, M. and Ford, T. and Kramer, T. and Weaver, T. and Hovish, K. and Islam, Z. and White, S. and Singh, S. P. | 2014 | The effect of organisational resources and eligibility issues on transition from child and adolescent to adult mental health services |
| Bendelow, G. and Warrington, C. A. and Jones, A. M. and Markham, S. | 2019 | Police detentions of 'mentally disordered persons': A multi-method investigation of section 136 use in Sussex |
| Bendik, Lesley-Anne and Spicer-White, Freya | 2021 | The untold perspective: Parents' experiences of the autism spectrum disorder assessment process when the child did not receive a diagnosis |
| Benham-Clarke, S. and Ford, T. and Mitchell, S. B. and Price, A. and Newlove-Delgado, T. and Blake, S. and Eke, H. and Moore, D. A. and Emma Russell, A. and Janssens, A. | 2021 | Role of education settings in transition from child to adult health services for young people with ADHD |
| Bennett, S. and Welch, A. and Shafran, R. and Heyman, I. and Coughtrey, A. | 2020 | Usual care for mental health problems in children with epilepsy: A cohort study |
| Bennett, S. D. and Heyman, I. and Coughtrey, A. E. and Varadkar, S. and Stephenson, T. and Epilepsy and Mental Health Programme Development Grant Research, Group and Shafran, R. | 2021 | Telephone-guided self-help for mental health difficulties in neurological conditions: a randomised pilot trial |
| Biehal, N. and Baldwin, H. and Cusworth, L. and Wade, J. and Allgar, V. | 2018 | In-home support or out of home care? Thresholds for intervention with abused and neglected children |
| Billington, T. and Gibson, S. and Fogg, P. and Lahmar, J. and Cameron, H. | 2022 | Conditions for mental health in education: Towards relational practice |
| Binns, A. M. and Bunce, C. and Dickinson, C. and Harper, R. and Tudor-Edwards, R. and Woodhouse, M. and Linck, P. and Suttie, A. and Jackson, J. and Lindsay, J. and Wolffsohn, J. and Hughes, L. and Margrain, T. H. | 2012 | How effective is low vision service provision? A systematic review |
| Bishop-Fitzpatrick, Lauren and et, al | 2019 | Autism spectrum disorder and the science of social work: a grand challenge for social work research |
| Blackman, Noelle | 2015 | Bringing Josh home |
| Blake, H. and Hanson, J. and Clark, L. | 2021 | The importance of an inclusive alumni network for ensuring effective transitions into employment and future destinations for people with learning disabilities |
| Blouchou, P. and Nicolson, R. I. | 2020 | Cerebellar Challenge for Adolescents at Risk of School Failure: Evaluation of a School-Based ‘Whole Person’ Intervention |
| Boddison, A. and Curran, H. | 2022 | The experience of SENCOs in England during the COVID-19 pandemic: the amplification and exposure of pre-existing strengths and challenges and the prioritisation of mental health and wellbeing in schools |
| Bohen, F. and Woodrow, C. | 2020 | Dynamic support database clinical support tool: inter-rater reliability |
| Bolland, Rachael and Richardson, Jim and Calnan, Rebecca | 2017 | How professionals should communicate with children who have mental healthcare needs |
| Bolton, S. C. and Laaser, K. | 2020 | The Moral Economy of Solidarity: A Longitudinal Study of Special Needs Teachers |
| Bond, C. and Hebron, J. and Oldfield, J. | 2017 | Professional learning among specialist staff in resourced mainstream schools for pupils with ASD and SLI |
| Bone, C. and O'Reilly, M. and Karim, K. and Vostanis, P. | 2015 | 'They're not witches. ...' Young children and their parents' perceptions and experiences of Child and Adolescent Mental Health Services |
| Bonfatto, M. and Crasnow, E. | 2018 | Gender/ed identities: an overview of our current work as child psychotherapists in the Gender Identity Development Service |
| Booth, A. and Maddison, J. and Wright, K. and Fraser, L. and Beresford, B. | 2018 | Research prioritisation exercises related to the care of children and young people with life-limiting conditions, their parents and all those who care for them: A systematic scoping review |
| Borek, A. J. and McDonald, B. and Fredlund, M. and Bjornstad, G. and Logan, S. and Morris, C. | 2018 | Healthy Parent Carers programme: development and feasibility of a novel group-based health-promotion intervention |
| Boshoff, K. and Bowen-Salter, H. and Gibbs, D. and Phillips, R. L. and Porter, L. and Wiles, L. | 2021 | A meta-synthesis of how parents of children with autism describe their experience of accessing and using routine healthcare services for their children |
| Boshoff, K. and Gibbs, D. and Phillips, R. L. and Wiles, L. and Porter, L. | 2018 | Parents' voices: 'Our process of advocating for our child with autism.' A meta-synthesis of parents' perspectives |
| Boswell, Naomi and Woods, Kevin | 2021 | Facilitators and barriers of co-production of services with children and young people within education, health and care services |
| Bowles, D. and Radford, J. and Bakopoulou, I. | 2018 | Scaffolding as a key role for teaching assistants: Perceptions of their pedagogical strategies |
| Boyce, T. and Dahlmann-Noor, A. and Bowman, R. and Keil, S. | 2015 | Support for infants and young people with sight loss: a qualitative study of sight impairment certification and referral to education and social care services |
| Boyden, P. and Muniz, M. and Laxton-Kane, M. | 2013 | Listening to the views of children with learning disabilities: an evaluation of a learning disability CAMHS service |
| Boyle, C. and Topping, K. and Jindal-Snape, D. and Norwich, B. | 2012 | The importance of peer-support for teaching staff when including children with special educational needs |
| Boyle, P. and Haines, D. and Lovelock, L. and Innes, K. | 2014 | Home safety for children with autistic spectrum disorder: Local authority occupational therapy intervention |
| Bradbury-Jones, C. and Breckenridge, J. P. and Devaney, J. and Duncan, F. and Kroll, T. and Lazenbatt, A. and Taylor, J. | 2015 | Priorities and strategies for improving disabled women's access to maternity services when they are affected by domestic abuse: a multi-method study using concept maps |
| Bradley, Valerie and Kwak, Miso and Highsmith, Rich and Croft, Bevin | 2021 | International advances in self-direction: themes from a disability leadership exchange: Managing Community Care |
| Brady, Geraldine | 2014 | Children and ADHD: seeking control within the constraints of diagnosis |
| Brady, Lucy and Padden, Ciara and McGill, Peter | 2019 | Improving procedural fidelity of behavioural interventions for people with intellectual and developmental disabilities: a systematic review |
| Bray, N. and Yeo, S. T. and Noyes, J. and Harris, N. and Edwards, R. T. | 2016 | Prioritising wheelchair services for children: A pilot discrete choice experiment to understand how child wheelchair users and their parents prioritise different attributes of wheelchair services |
| Brede, J. and Cage, E. and Trott, J. and Palmer, L. and Smith, A. and Serpell, L. and Mandy, W. and Russell, A. | 2022 | "We Have to Try to Find a Way, a Clinical Bridge" - autistic adults' experience of accessing and receiving support for mental health difficulties: A systematic review and thematic meta-synthesis |
| Brenman, N. F. and Hiddinga, A. and Wright, B. | 2017 | Intersecting Cultures in Deaf Mental Health: An Ethnographic Study of NHS Professionals Diagnosing Autism in D/deaf Children |
| Breyer, C. and Lederer, J. and Gasteiger-Klicpera, B. | 2021 | Learning and support assistants in inclusive education: a transnational analysis of assistance services in Europe |
| Brigden, Amberly and Shaw, Alison and Crawley, Esther | 2021 | "it's a medical condition, you need to support as much as possible": a qualitative analysis of teachers' experiences of chronic fatigue syndrome / myalgic encephalomyelitis (CFS/ME) |
| Briggs, S. and Hingley-Jones, H. | 2013 | Reconsidering adolescent subjectivity: A 'practice-near' approach to the study of adolescents, including those with severe learning disabilities |
| Bright, Naomi and et, al | 2018 | Families’ experiences of raising concerns in health care services: an interpretative phenomenological analysis |
| Brimblecombe, N. and Pickard, L. and King, D. and Knapp, M. | 2017 | Perceptions of unmet needs for community social care services in England. A comparison of working carers and the people they care for |
| Brimblecombe, Nicola and Stevens, Madeleine and King, Derek and Knapp, Martin | 2022 | The role of formal care services in supporting young people who provide unpaid care in England |
| Broad, K. L. and Sandhu, V. K. and Sunderji, N. and Charach, A. | 2017 | Youth experiences of transition from child mental health services to adult mental health services: a qualitative thematic synthesis |
| Brogan, E. and Cragg, L. and Gilmore, C. and Marlow, N. and Simms, V. and Johnson, S. | 2014 | Inattention in very preterm children: implications for screening and detection |
| Brooks, F. and Bloomfield, L. and Offredy, M. and Shaughnessy, P. | 2013 | Evaluation of services for children with complex needs: mapping service provision in one NHS Trust |
| Broomhead, K. | 2013 | Blame, guilt and the need for 'labels'; insights from parents of children with special educational needs and educational practitioners |
| Broomhead, K. | 2014 | 'A clash of two worlds'; disjuncture between the norms and values held by educational practitioners and parents of children with behavioural, emotional and social difficulties |
| Broomhead, K. E. | 2013 | 'Going the extra mile': Educational practitioners compensating for perceived inadequacies in the parenting of children with behavioural, emotional and social difficulties (BESD) |
| Broomhead, K. E. | 2013 | Preferential treatment or unwanted in mainstream schools? The perceptions of parents and teachers with regards to pupils with special educational needs and challenging behaviour |
| Broomhead, K. E. | 2016 | ‘They think that if you're a teacher here ‚Ä¶ you're not clever enough to be a proper teacher’: the courtesy stigma experienced by teachers employed at schools for pupils with behavioural, emotional and social difficulties (BESD) |
| Broomhead, K. E. | 2018 | Perceived responsibility for developing and maintaining home-school partnerships: the experiences of parents and practitioners |
| Brosnan, Mark and Parsons, Sarah and Good, Judith and Yuill, Nicola | 2016 | How can participatory design inform the design and development of innovative technologies for autistic communities? |
| Brown, Andrew and Waters, Cerith S and Shelton, Katherine H | 2017 | A systematic review of the school performance and behavioural and emotional adjustments of children adopted from care |
| Brown, F. J. and Cooper, K. and Diebel, T. | 2013 | Access to mainstream health services: A case study of the difficulties faced by a child with learning disabilities |
| Brown, H. and Marchant, L. | 2013 | Using the Mental Capacity Act in complex cases |
| Brown, Jeremy and Brown, Judith and Woodburn, Jane | 2014 | Dental services for children with autism spectrum disorder |
| Brown, M. and Higgins, A. and MacArthur, J. | 2020 | Transition from child to adult health services: A qualitative study of the views and experiences of families of young adults with intellectual disabilities |
| Brown, M. and Hoyle, L. and Karatzias, T. | 2016 | The experiences of family carers in the delivery of invasive clinical interventions for young people with complex intellectual disabilities: policy disconnect or policy opportunity? |
| Brown, M. and MacArthur, J. and Truesdale, M. and Higgins, A. | 2022 | The transition from child to adult health services for young adults with intellectual disabilities: An evaluation of a pilot of an online learning resource for Registered Nurses |
| Bruffaerts, R. and Mortier, P. and Auerbach, R. P. and Alonso, J. and Hermosillo De la Torre, A. E. and Cuijpers, P. and Demyttenaere, K. and Ebert, D. D. and Green, J. G. and Hasking, P. and Stein, D. J. and Ennis, E. and Nock, M. K. and Pinder-Amaker, S. and Sampson, N. A. and Vilagut, G. and Zaslavsky, A. M. and Kessler, R. C. and Collaborators, Who Wmh-Ics | 2019 | Lifetime and 12-month treatment for mental disorders and suicidal thoughts and behaviors among first year college students |
| Bryant, L. D. and Puri, S. C. and Dix, L. and Ahmed, S. | 2016 | Tell it Right, Start it Right: An evaluation of training for health professionals about Down syndrome |
| Buick, T. A. and Hamilton, D. and Weatherdon, G. and O'Shea, C. I. and McAlpine, G. | 2018 | Evaluating the effects of a peer-led suturing and wound management workshop for doctors working in a psychiatric hospital |
| Bullock, Lyndal M. and Zolkoski, Staci M. and Estes, Mary Bailey | 2015 | Meeting the mental health needs of children and youth: using evidence-based education worldwide |
| Bunt, S. | 2018 | Critical realism and grounded theory: Analysing the adoption outcomes for disabled children using the retroduction framework |
| Burke, L. and John, M. and Hanna, P. | 2022 | A qualitative exploration of how young men in the UK perceive and experience informal help-seeking for mental health difficulties |
| Burke, Meghan M. and Patton, Kimberly A. and Taylor, Julie Lounds | 2016 | Family support: a review of the literature on families of adolescents with disabilities |
| Butler, G. and De Graaf, N. and Wren, B. and Carmichael, P. | 2018 | Assessment and support of children and adolescents with gender dysphoria |
| Butterly, F. and Percy, C. and Ward, G. | 2013 | Brief report: do service dog providers placing dogs with children with developmental disabilities use outcome measures and, if so, what are they? |
| Byrne, B. | 2014 | Getting In and Getting On? The Experiences of Young People with Visual Impairments and Hearing Impairments in Third-level Education |
| Byrnes, Z. | 2012 | Educational psychologists in the community: Supporting parents of children with Down syndrome through times of transition |
| Cairns, B. and McClatchey, K. | 2013 | Comparing children's attitudes towards disability |
| Cairns, D. and Brown, J. and Tolson, D. and Darbyshire, C. | 2014 | Caring for a child with learning disabilities over a prolonged period of time: An exploratory survey on the experiences and health of older parent carers living in Scotland |
| Cairns, Deborah and et, al | 2013 | The need for future alternatives: an investigation of the experiences and future of older parents caring for offspring with learning disabilities over a prolonged period of time |
| Calder, S. and Ward, R. and Jones, M. and Johnston, J. and Claessen, M. | 2018 | The uses of outcome measures within multidisciplinary early childhood intervention services: a systematic review |
| Camm-Crosbie, L. and Bradley, L. and Shaw, R. and Baron-Cohen, S. and Cassidy, S. | 2019 | 'People like me don't get support': Autistic adults' experiences of support and treatment for mental health difficulties, self-injury and suicidality |
| Campbell, P. and Bell, P. | 2015 | Assessing the need for low secure care in Northern Ireland |
| Capewell, C. | 2016 | Glue ear - a common but complicated childhood condition |
| Carey, M. and Prynallt-Jones, K. A. | 2018 | Using Codes of Ethics for Disabled Children Who Communicate Non-verbally: Some Challenges and Implications for Social Workers |
| Carroll, C. and Dockrell, J. | 2012 | Enablers and challenges of post-16 education and employment outcomes: the perspectives of young adults with a history of SLI |
| Carter, A. and Clarke, L. and Stevens, C. | 2022 | Dental health for children with special educational needs and disability |
| Cartwright, Luke and et, al | 2017 | Barriers to increasing the physical activity of people with intellectual disabilities |
| Caslin, M. | 2021 | ‘They have just given up on me’: How pupils labelled with social, emotional and behavioural difficulties (SEBD) experience the process of exclusion from school |
| Castell, E. and Stenfert Kroese, B. | 2016 | Midwives' experiences of caring for women with learning disabilities - A qualitative study |
| Castro, S. and Palikara, O. and Gaona, C. and Eirinaki, V. | 2020 | "No policy is an island": how the ICF international classification system may support local education planning in England |
| Catchpole, R. | 2013 | Looked after young people and mental health stigma |
| Chambers, M. and McAndrew, S. and Nolan, F. and Thomas, B. and Watts, P. and Grant, R. and Kantaris, X. | 2019 | The Therapeutic Engagement Questionnaire (TEQ): a service user-focused mental health nursing outcome metric |
| Charitou, M. and Quayle, E. and Sutherland, A. | 2021 | Supporting Adults with Intellectual Disabilities with Relationships and Sex: A Systematic Review and Thematic Synthesis of Qualitative Research with Staff |
| Chase, Jennifer and McGill, Peter | 2019 | The sibling’s perspective: experiences of having a sibling with a learning disability and behaviour described as challenging Jennifer Chase |
| Chester, Verity and Geach, Nicole and Morrissey, Catrin | 2019 | Treatment outcomes from forensic intellectual disability services: the perspectives of patients and their family/carers |
| Chilvers, R. and Gratton, S. and Bernard, S. H. | 2013 | Satisfaction with a child and adolescent mental health services (CAMHS) intellectual disability service |
| Chowbey, P. and Salway, S. and Ismail, M. | 2012 | Influences on diagnosis and treatment of eating disorders among minority ethnic people in the UK |
| Clark Bryan, D. and Macdonald, P. and Ambwani, S. and Cardi, V. and Rowlands, K. and Willmott, D. and Treasure, J. | 2020 | Exploring the ways in which COVID-19 and lockdown has affected the lives of adult patients with anorexia nervosa and their carers |
| Clark Bryan, D. and MacDonald, P. and Cardi, V. and Rowlands, K. and Ambwani, S. and Arcelus, J. and Bonin, E. M. and Landau, S. and Schmidt, U. and Treasure, J. | 2022 | Transitions from intensive eating disorder treatment settings: qualitative investigation of the experiences and needs of adults with anorexia nervosa and their carers |
| Clark, L. J. and Glennie, L. and Audrey, S. and Hickman, M. and Trotter, C. L. | 2013 | The health, social and educational needs of children who have survived meningitis and septicaemia: the parents' perspective |
| Clarke, Susan and Sloper, Patricia and Moran, Nicola and Cusworth, Linda and Franklin, Anita and Beecham, Jennifer | 2011 | Multi-agency transition services: greater collaboration needed to meet the priorities of young disabled people with complex needs as they move into adulthood |
| Clegg, J. and Ansorge, L. and Stackhouse, J. and Donlan, C. | 2012 | Developmental communication impairments in adults: outcomes and life experiences of adults and their parents |
| Clements, C. and Kapur, N. and Jones, S. H. and Morriss, R. and Peters, S. | 2019 | Qualitative investigation of relatives' and service users' experience of mental healthcare for suicidal behaviour in bipolar disorder |
| Coates, J. K. | 2012 | Teaching inclusively: Are secondary physical education student teachers sufficiently prepared to teach in inclusive environments? |
| Coates, J. K. and Harris, J. and Waring, M. | 2020 | The effectiveness of a special school experience for improving preservice teachers’ efficacy to teach children with special educational needs and disabilities |
| Coates, R. and de Visser, R. and Ayers, S. | 2015 | Not identifying with postnatal depression: a qualitative study of women's postnatal symptoms of distress and need for support |
| Cochrane, H. and Soni, A. | 2020 | Education, health and care plans: What do we know so far? |
| Codd, J. and Hewitt, O. | 2021 | Having a son or daughter with an intellectual disability transition to adulthood: A parental perspective |
| Codling, M. and Knowles, J. and Vevers, A. | 2014 | End-of-life training for paid carers working with people with learning disabilities |
| Cohen, W. and McCartney, E. and Crampin, L. | 2017 | 22q11 deletion syndrome: Parents' and children's experiences of educational and healthcare provision in the United Kingdom |
| Collins, B., Hall, J., Ireland, J., and Hundley, V. | 2017 | Experiences of disabled women during pregnancy, childbirth and early parenting services: implications for occupational therapy...RCOT (Royal College of Occupational Therapist) Annual Conference 2017 |
| Collins, M. and Langer, S. and Welch, V. and Wells, E. and Hatton, C. and Robertson, J. and Emerson, E. | 2014 | A break from caring for a disabled child: Parent perceptions of the uses and benefits of short break provision in England |
| Collins, Rebecca and Notley, Caitlin and Clarke, Tim and Wilson, Jon and Fowler, David | 2017 | Participation in developing youth mental health services: ‘Cinderella service’ to service re-design |
| Colucci, Erminia and Szwarc, Josef and Minas, Harry and Paxton, Georgia and Guerra, Carmel | 2014 | The utilisation of mental health services by children and young people from a refugee background: a systematic literature review |
| Colver, Allan and Rapley, Tim and Parr, Jeremy R and McConachie, Helen and Dovey-Pearce, Gail and Le, Couteur and McDonagh, Janet E and Bennett, Caroline and Hislop, Jennifer and Maniatopoulos, Gregory | 2019 | Facilitating the transition of young people with long-term conditions through health services from childhood to adulthood: the Transition research programme |
| Colwell, C. M. | 2013 | Simulating disabilities as a tool for altering individual perceptions of working with children with special needs |
| Conn, C. and Lewis, M. and Matthews, S. | 2020 | An analysis of educational dialogue as support for learning for young pupils with autism in mainstream schools |
| Connor, C. and Collaboration for Leadership in Applied Health, Research and Care West Midlands Youth Mental, Health | 2017 | Listen and learn: engaging young people, their families and schools in early intervention research |
| Connor, C. and Greenfield, S. and Lester, H. and Channa, S. and Palmer, C. and Barker, C. and Lavis, A. and Birchwood, M. | 2016 | Seeking help for first-episode psychosis: a family narrative |
| Cook, A. and Ogden, J. | 2022 | Challenges, strategies and self-efficacy of teachers supporting autistic pupils in contrasting school settings: a qualitative study |
| Cooper, K. and Loades, M. E. and Russell, A. | 2018 | Adapting psychological therapies for autism |
| Cooper, K. and McElwee, J. | 2016 | Network training for a boy with learning disabilities and behaviours that challenge |
| Coren, E. and Hossain, R. and Pardo, J. P. and Veras, M. M. and Chakraborty, K. and Harris, H. and Martin, A. J. | 2013 | Interventions for promoting reintegration and reducing harmful behaviour and lifestyles in street-connected children and young people |
| Costley, D. and Emerson, A. and Ropar, D. and Sheppard, E. | 2021 | The anxiety caused by secondary schools for autistic adolescents: In their own words |
| Coughlan, B. and Duschinsky, R. and O'Connor, M. E. and Woolgar, M. | 2020 | Identifying and managing care for children with autism spectrum disorders in general practice: A systematic review and narrative synthesis |
| Courtney, E. and Kiernan, G. and Guerin, S. and Ryan, K. and McQuillan, R. | 2018 | Mothers' perspectives of the experience and impact of caring for their child with a life-limiting neurodevelopmental disability |
| Cox, J. S. and Semple, C. and Augustus, R. and Wenn, M. and Easter, S. and Broadbent, R. and Giri, D. and Hinton, E. C. | 2021 | Qualitative Parental Perceptions of a Paediatric Multidisciplinary Team Clinic for Prader-Willi Syndrome |
| Crabtree, E. and Wolfe, S. and Austin, M. | 2012 | Promoting participation in recruitment and selection for a CAMHS Learning Disability Service |
| Cramer, H. and Horwood, J. and Payne, S. and Araya, R. and Lester, H. and Salisbury, C. | 2014 | Do depressed and anxious men do groups? What works and what are the barriers to help seeking? |
| Crane, L. and Adams, F. and Harper, G. and Welch, J. and Pellicano, E. | 2019 | 'Something needs to change': Mental health experiences of young autistic adults in England |
| Crane, L. and Davies, J. and Fritz, A. and O‚ÄôBrien, S. and Worsley, A. and Ashworth, M. and Remington, A. | 2021 | The transition to adulthood for autistic young people with additional learning needs: the views and experiences of education professionals in special schools |
| Crane, Laura and Batty, Richard and Adeyinka, Hanna and Goddard, Lorna and Henry, Lucy A. and Hill, Elisabeth L. | 2018 | Autism Diagnosis in the United Kingdom: Perspectives of Autistic Adults, Parents and Professionals |
| Cranmer, S. | 2020 | Disabled children's evolving digital use practices to support formal learning. A missed opportunity for inclusion |
| Cribben, H. and MacDonald, P. and Treasure, J. and Cini, E. and Nicholls, D. and Batchelor, R. and Kan, C. | 2021 | The experiential perspectives of parents caring for a loved one with a restrictive eating disorder in the UK |
| Crombie, R. and Sullivan, L. and Walker, K. and Warnock, R. | 2014 | Unconscious and unnoticed professional practice within an outstanding school for children and young people with complex learning difficulties and disabilities |
| Crouch, L. and Reardon, T. and Farrington, A. and Glover, F. and Creswell, C. | 2019 | "Just keep pushing": Parents' experiences of accessing child and adolescent mental health services for child anxiety problems |
| Crowe, M. and Maciver, D. and Rush, R. and Forsyth, K. | 2020 | Psychometric Evaluation of the ACHIEVE Assessment |
| Cruice, M. and Botting, N. and Marshall, J. and Boyle, M. and Hersh, D. and Pritchard, M. and Dipper, L. | 2020 | UK speech and language therapists' views and reported practices of discourse analysis in aphasia rehabilitation |
| Cruice, M. and Ten Kate, O. | 2019 | Clinicians’ views and practices in quality of life in aphasia rehabilitation: a preliminary study |
| Cullen, M. A. and Lindsay, G. | 2019 | Special Educational Needs: Understanding Drivers of Complaints and Disagreements in the English System |
| Cummins, C. and Pellicano, E. and Crane, L. | 2020 | Autistic adults' views of their communication skills and needs |
| Cunningham, Barbara J. and Rosenbaum, Peter L. | 2014 | Measure of Processes of Care: a review of 20 years of research |
| Cybulski, Lukasz and Ashcroft, Darren M. and Carr, Matthew J. and Garg, Shruti and Carolyn, A. Chew‚ÄêGraham and Kapur, Nav and Webb, Roger T. | 2022 | Risk factors for nonfatal self-harm and suicide among adolescents: two nested case-control studies conducted in the UK Clinical Practice Research Datalink |
| D'Astous, V. and Manthorpe, J. and Lowton, K. and Glaser, K. | 2016 | Retracing the Historical Social Care Context of Autism: A Narrative Overview |
| Dale, Oliver and Sethi, Faisil and Stanton, Clive and Evans, Sacha and Barnicot, Kirsten and Sedgwick, Rosemary and Goldsack, Steve and Doran, Monica and Shoolbred, Lucinda and Samele, Chiara and Urquia, Norman and Haigh, Rex and Moran, Paul | 2017 | Personality disorder services in England: findings from a national survey |
| Daley, David and Van Der Oord, Saskia and Ferrin, Maite and Cortese, Samuele and Danckaerts, Marina and Doepfner, Manfred and Van den Hoofdakker, Barbara J. and Coghill, David and Thompson, Margaret and Asherson, Philip and Banaschewski, Tobias and Brandeis, Daniel and Buitelaar, Jan and Dittmann, Ralf W. and Hollis, Chris and Holtmann, Martin and Konofal, Eric and Lecendreux, Michel and Rothenberger, Aribert and Santosh, Paramala | 2018 | Practitioner Review: Current best practice in the use of parent training and other behavioural interventions in the treatment of children and adolescents with attention deficit hyperactivity disorder |
| Daniels, H. and Thompson, I. and Tawell, A. | 2019 | After Warnock: The Effects of Perverse Incentives in Policies in England for Students With Special Educational Needs |
| Daniels, H. and Thompson, I. and Tawell, A. | 2019 | Practices of exclusion in cultures of inclusive schooling in the United Kingdom |
| Darongkamas, J. and Dobel-Ober, D. and Moody, B. and Wakelin, R. and Saddique, S. | 2020 | Training NHS staff to work with people with trauma induced emotional regulation and interpersonal relational difficulties (TIERI)/borderline personality disorder |
| Datta, G. and Durbin, K. and Odell, A. and Ramirez-Inscoe, J. and Twomey, T. | 2020 | The development and implementation of the Nottingham early cognitive and listening links (Early CaLL); A framework designed to support expectation counselling and to monitor the progress, post cochlear implantation, of deaf children with severe (SLD) and profound and multiple learning difficulties (PMLD) and associated complex needs |
| Davies, Jill and Matuska, George | 2018 | Workforce development: perspectives from people with learning disabilities |
| Davies, K. E. and Marshall, J. and Brown, L. J. E. and Goldbart, J. | 2019 | SLTs' conceptions about their own and parents' roles during intervention with preschool children |
| Davies, Karen and Davies, Peter | 2012 | Tensions in commissioning: services for children's speech, language and communication needs in one English region |
| Davies, Trevor | 2013 | Incorporating Creativity into Teachers Practice and Self-Concept of Professional Identity |
| Davis, John M. and Ravenscroft, John and Bizas, Nik | 2015 | Transition, Inclusion and Partnership: Child-, Parent- and Professional-Led Approaches in a European Research Project |
| Davis, K. and Carter, S. and Myers, E. and Rocca, N. | 2018 | Health promotion for young people with profound and multiple learning disabilities |
| Davys, D. and Collins, T. | 2016 | Men as caregivers: implications for occupational therapy |
| Davys, Deborah and Collins, Tracy | 2020 | Supportive strategies for men who perform a care role: an occupational perspective |
| Davys, Deborah and Mitchell, Duncan and Haigh, Carol | 2015 | Futures planning: adult sibling perspectives |
| Davys, Deborah and Mitchell, Duncan and Martin, Rachel | 2017 | Fathers of adults who have a learning disability: roles, needs and concerns |
| Davys, Deborah and Mitchell, Duncan and Martin, Rachel | 2017 | Fathers of people with intellectual disability: a review of the literature |
| Day, C. and Briskman, J. and Crawford, M. J. and Harris, L. and McCrone, P. and McMurran, M. and Moran, P. and Morgan, L. and Scott, S. and Stahl, D. and Ramchandani, P. and Weaver, T. | 2017 | Feasibility trial of a psychoeducational intervention for parents with personality difficulties: The Helping Families Programme |
| de Alwis, Y. and Horridge, K. | 2016 | Safeguarding disabled children and young people |
| de Valenzuela, J. S. and Bird, E. K. and Parkington, K. and Mirenda, P. and Cain, K. and MacLeod, A. A. and Segers, E. | 2016 | Access to Opportunities for Bilingualism for Individuals with Developmental Disabilities: Key Informant Interviews |
| de Villiers, Jana and Doyle, Michael | 2015 | Making a difference? Ten years of managing people with intellectual disability and forensic needs in the community |
| Deb, S. and Nancarrow, T. and Limbu, B. and Sheehan, R. and Wilcock, M. and Branford, D. and Courtenay, K. and Perera, B. and Shankar, R. | 2020 | UK psychiatrists' experience of withdrawal of antipsychotics prescribed for challenging behaviours in adults with intellectual disabilities and/or autism |
| Deleo, K. and MacOnick, L. and McCabe, R. and Broeckelmann, E. and Sheridan Rains, L. and Rowe, S. and Johnson, S. | 2022 | Experiences of crisis care among service users with complex emotional needs or a diagnosis of 'personality disorder', and other stakeholders: Systematic review and meta-synthesis of the qualitative literature |
| Denne, L. D. and Hastings, R. P. and Hughes, J. C. | 2017 | UK parents’ beliefs about applied behaviour analysis as an approach to autism education |
| Denne, L. D. and Thomas, E. and Hastings, R. P. and Hughes, J. C. | 2015 | Assessing competencies in applied behavior analysis for tutors working with children with autism in a school-based setting |
| Devecchi, C. and Dettori, F. and Doveston, M. and Sedgwick, P. and Jament, J. | 2012 | Inclusive classrooms in Italy and England: The role of support teachers and teaching assistants |
| Deville, J. and Davies, H. and Kane, R. and Nelson, D. and Mansfield, P. | 2019 | Planning for the future: Exploring the experiences of older carers of adult children with a learning disability |
| Devine, A. and Solt√©sz, F. and Nobes, A. and Goswami, U. and Szucs, D. | 2013 | Gender differences in developmental dyscalculia depend on diagnostic criteria |
| Dewey, K. and Hodgkinson, M. | 2022 | The experiences of fathers who have a child with autism spectrum disorder: from birth to adulthood |
| Dhuga, Y. and Feeney, Y. and Gallaher, L. and White, A. and Wright, J. and Banerjee, S. and Daley, S. | 2022 | Developing undergraduate autism education for medical students: a qualitative study |
| Di Rezze, Briano and Law, Mary and Eva, Kevin and Pollock, Nancy and Gorter, Jan Willem | 2014 | Therapy behaviours in paediatric rehabilitation: essential attributes for intervention with children with physical disabilities |
| Dickens, Geoffrey L. and Lamont, Emma and Stirling, Fiona J. and Mullen, Jo and MacArthur, Nadine | 2019 | Mixed methods evaluation of an educational intervention to change mental health nurses' attitudes to people diagnosed with borderline personality disorder |
| Diggle, T. T. J. and McConachie, H. | 2013 | Parent-mediated early intervention for young children with autism spectrum disorder |
| Dillenburger, K. and McKerr, L. and Jordan, J. A. and Keenan, M. | 2016 | Staff Training in Autism: The One-Eyed Wo/Man |
| Dillon, G. V. and Underwood, J. D. M. and Freemantle, L. J. | 2016 | Autism and the U.K. secondary school experience |
| Dimitrellou, E. and Hurry, J. | 2019 | School belonging among young adolescents with SEMH and MLD: the link with their social relations and school inclusivity |
| Dimitriadis, C. and Georgeson, J. | 2018 | Provision for mathematically able children in primary schools: a review of practice five years after England dropped the gifted and talented initiative |
| Dittrich, R. and Burgess, L. | 2012 | Improving autism services in Hampshire: A lifespan approach |
| Dixon, K. and Braye, S. and Gibbons, T. | 2021 | Still outsiders: The inclusion of disabled children and young people in physical education in England |
| Doak, L. | 2021 | ‘To start talking phonics is crazy’: how parents understand ‘literacy’ in the lives of children with learning disabilities |
| Dobson, G. and Douglas, G. | 2020 | Factors influencing the career interest of SENCOs in English schools |
| Dockrell, J. E. and Howell, P. | 2015 | Identifying the challenges and opportunities to meet the needs of children with speech, language and communication difficulties |
| Dockrell, J. E. and Hurry, J. | 2018 | The identification of speech and language problems in elementary school: Diagnosis and co-occurring needs |
| Dockrell, J. E. and Ricketts, J. and Palikara, O. and Charman, T. and Lindsay, G. A. | 2019 | What Drives Educational Support for Children With Developmental Language Disorder or Autism Spectrum Disorder: Needs, or Diagnostic Category? |
| Dodd, Karen and Burke, Christine and Gibson, Alex and Hines, Emma and Howarth, Patrick and Jennison, Jo and Mackintosh, Reiko and Radcliffe, Alisdair and Vieira, Filipe and Unsworth, Gisela | 2017 | Improving Access to Psychological Therapies for people with intellectual disabilities: A role of a reference group in achieving change |
| Done, E. J. and Andrews, M. J. | 2020 | How inclusion became exclusion: policy, teachers and inclusive education |
| Doody, O. and Bailey, M. E. | 2017 | Pain and pain assessment in people with intellectual disability: Issues and challenges in practice |
| Doody, O. and Lyons, R. and Ryan, R. | 2019 | The experiences of adults with intellectual disability in the involvement of nursing care planning in health services |
| Dounavi, K. and Fennell, B. and Early, E. | 2019 | Supervision for Certification in the Field of Applied Behaviour Analysis: Characteristics and Relationship with Job Satisfaction, Burnout, Work Demands, and Support |
| Dovey-Pearce, G. and Price, C. and Wood, H. and Scott, T. and Cookson, J. and Corbett, S. | 2012 | Young people (13 to 21) with disabilities in transition from childhood to adulthood: An exploratory, qualitative study of their developmental experiences and health care needs |
| Downs, J. M. and Ford, T. and Stewart, R. and Epstein, S. and Shetty, H. and Little, R. and Jewell, A. and Broadbent, M. and Deighton, J. and Mostafa, T. and Gilbert, R. and Hotopf, M. and Hayes, R. | 2019 | An approach to linking education, social care and electronic health records for children and young people in South London: a linkage study of child and adolescent mental health service data |
| Downs, S. J. and Knowles, Z. R. and Fairclough, S. J. and Heffernan, N. and Whitehead, S. and Halliwell, S. and Boddy, L. M. | 2014 | Exploring teachers' perceptions on physical activity engagement for children and young people with intellectual disabilities |
| Dumbleton, Sue | 2013 | Goodies and baddies: equivocal thoughts about families using an autoethnographic approach to explore some tensions between service providers and families of people with learning disabilities |
| Dunne, E. and Rogers, B. | 2013 | "It's us that have to deal with it seven days a week": carers and borderline personality disorder |
| Ebbels, S. H. and Bannister, L. and Holland, B. and Campbell, L. | 2022 | Effectiveness of intervention focused on vocational course vocabulary in post-16 students with (developmental) language disorder |
| Edwards, A. | 2020 | Agency, common knowledge and motive orientation: Working with insights from Hedegaard in research on provision for vulnerable children and young people |
| Efthymiou, E. and Kington, A. | 2017 | The development of inclusive learning relationships in mainstream settings: A multimodal perspective |
| Eke, H. | 2019 | In transition between child and adult services for young people with Attention Deficit Hyperactivity Disorder (ADHD) : the need for transition and the use and usefulness of the National Institute of Health and Care Excellence (NICE) guidelines |
| Eke, H. and Ford, T. and Newlove-Delgado, T. and Price, A. and Young, S. and Ani, C. and Sayal, K. and Lynn, R. M. and Paul, M. and Janssens, A. | 2020 | Transition between child and adult services for young people with attention-deficit hyperactivity disorder (ADHD): findings from a British national surveillance study |
| Eke, H. and Janssens, A. and Downs, J. and Lynn, R. M. and Ani, C. and Ford, T. | 2019 | How to measure the need for transition to adult services among young people with Attention Deficit Hyperactivity Disorder (ADHD): a comparison of surveillance versus case note review methods |
| Eke, Helen and Janssens, Astrid and Newlove‚ÄêDelgado, Tamsin and Paul, Moli and Price, Anna and Young, Susan and Ford, Tamsin | 2020 | Clinician perspectives on the use of National Institute for Health and Care Excellence guidelines for the process of transition in Attention Deficit Hyperactivity Disorder |
| Ekins, A. and Savolainen, H. and Engelbrecht, P. | 2016 | An analysis of English teachers’ self-efficacy in relation to SEN and disability and its implications in a changing SEN policy context |
| Eklund, H. and Findon, J. and Cadman, T. and Hayward, H. and Murphy, D. and Asherson, P. and Glaser, K. and Xenitidis, K. | 2018 | Needs of Adolescents and Young Adults with Neurodevelopmental Disorders: Comparisons of Young People and Parent Perspectives |
| Elliott, J. G. and Resing, W. C. M. | 2015 | Can intelligence testing inform educational intervention for children with reading disability? |
| Elms, B. and Higgins, A. | 2022 | The potential role for educational psychologists working with systems supporting young people with eating disorders |
| Elwell, Gail and Hallas, Penny | 2016 | 'M.E. time': meaningful engagement for people with a learning disability in secondary care |
| Emerson, E. and Glover, G. | 2012 | The "transition cliff" in the administrative prevalence of learning disabilities in England |
| English, B. and Tickle, A. and das Nair, R. and Moore, K. | 2020 | Consensus-based good practice guidelines for clinical psychologists to support care staff in enabling sexual expression in people with intellectual disabilities-A Delphi study |
| Erdem, R. | 2017 | Students with special educational needs and assistive technologies: A literature review |
| Eruyar, Seyda and Vostanis, Panos and Huemer, Julia | 2018 | Review: How should child mental health services respond to the refugee crisis? |
| Erwin, J. and Paisi, M. and Neill, S. and Burns, L. and Vassallo, I. and Nelder, A. and Facenfield, J. and Devalia, U. and Vassallo, T. and Witton, R. | 2022 | Factors influencing oral health behaviours, access and delivery of dental care for autistic children and adolescents: A mixed-methods systematic review |
| Eva‚ÄêMaria, Hempe and Morrison, Cecily and Holland, Anthony | 2015 | Exploring the boundary of a specialist service for adults with intellectual disabilities using a Delphi study: a quantification of stakeholder participation |
| Evans, A. | 2013 | From exclusion to inclusion; supporting Special Educational Needs Co-ordinators to keep children in mainstream education: A qualitative psychoanalytic research project |
| Evans, N. | 2017 | Experiences of a child and adolescent mental health service |
| Ewart, I. J. and Harty, C. | 2015 | Provision of Disability Adaptations to the Home: Analysis of Household Survey Data |
| Farrand, P. and Woodford, J. | 2013 | Measurement of individualised quality of life amongst young people with indicated personality disorder during emerging adulthood using the SEIQoL-DW |
| Fazel, Mina and Newby, Danielle | 2021 | Mental well-being and school exclusion: changing the discourse from vulnerability to acceptance |
| Feiler, A. and Porter, J. and Daniels, H. and Georgeson, J. and Hacker, J. and Martin, S. | 2012 | The use and usefulness of a parent questionnaire to help schools identify disability |
| Felton, Anne and Holliday, Laura and Ritchie, Dawn and Langmack, Gill and Conquer, Alistair | 2013 | Simulation: A shared learning experience for child and mental health pre-registration nursing students |
| Fennell, B. and Dillenburger, K. | 2018 | Applied behaviour analysis: What do teachers of students with autism spectrum disorder know |
| Finlayson, Janet and Darbyshire, Chris | 2015 | What students, carers and children can learn from family placements |
| Firth, G. and Glyde, M. and Denby, G. | 2021 | A qualitative study of the practice-related decision-making of Intensive Interaction Practitioners |
| Firzgerald, Martin and Ratcliffe, Gemma and Blythe, Cherelle | 2012 | Family work in occupational therapy: a case study from a forensic service |
| Fish, R. | 2016 | Friends and family: regulation and relationships on the locked ward |
| Fitzgerald, H. | 2012 | 'Drawing' on disabled students' experiences of physical education and stakeholder responses |
| Fitzgerald, H. and Stride, A. | 2012 | Stories about Physical Education from Young People with Disabilities |
| Fitzgerald, M. and McNicholas, F. | 2014 | Attitudes and practices in the management of ADHD among healthcare professionals who responded to a European survey |
| Flegg, Mirika and Gordon-Walker, Maggie and Maguire, Shona | 2015 | Peer-to-peer mental health: a community evaluation case study |
| Fleming, Isobel and Jones, Melanie and Bradley, Jenna and Wolpert, Miranda | 2016 | Learning from a Learning Collaboration: The CORC Approach to Combining Research, Evaluation and Practice in Child Mental Health |
| Flodgren, G. and Rachas, A. and Farmer, A. J. and Inzitari, M. and Shepperd, S. | 2015 | Interactive telemedicine: effects on professional practice and health care outcomes |
| Fong, Vanessa and Gardiner, Emily and Iarocci, Grace | 2021 | Satisfaction with informal supports predicts resilience in families of children with autism spectrum disorder |
| Foreman, D. | 2015 | The psychiatry of children aged 0-4: Advances in assessment, diagnosis and treatment |
| Foster, Celeste and Smedley, Kirsty | 2019 | Understanding the nature of mental health nursing within CAMHS PICU: 1. Identifying nursing interventions that contribute to the recovery journey of young people |
| Fox, Fiona and Aabe, Nura and Turner, Katrina and Redwood, Sabi and Rai, Dheeraj | 2017 | 'It was like walking without knowing where I was going': A Qualitative Study of Autism in a UK Somali Migrant Community |
| Franklin, A. and Smeaton, E. | 2017 | Recognising and responding to young people with learning disabilities who experience, or are at risk of, child sexual exploitation in the UK |
| Franklin, Anita and Goff, Sarah | 2019 | Listening and facilitating all forms of communication: disabled children and young people in residential care in England |
| Freeth, H. and Wood, S. and Allsopp, M. and Wilkinson, K. | 2020 | Improving the quality of hospital care provided to people aged 11-25 years with a mental health condition |
| French, B. and Perez Vallejos, E. and Sayal, K. and Daley, D. | 2020 | Awareness of ADHD in primary care: stakeholder perspectives |
| Fuggle, P. | 2015 | Are clinician ratings useful in evaluating outcomes in Child and Adolescent Mental Health Services (CAMHS)? A study of a continuous series of 1446 cases from an inner city CAMHS |
| Fuggle, P. and Bevington, D. and Cracknell, L. and Hanley, J. and Hare, S. and Lincoln, J. and Richardson, G. and Stevens, N. and Tovey, H. and Zlotowitz, S. | 2015 | The Adolescent Mentalization-based Integrative Treatment (AMBIT) approach to outcome evaluation and manualization: adopting a learning organization approach |
| Galanopoulos, A. and Robertson, D. and Woodhouse, E. | 2016 | The assessment of autism spectrum disorders in adults |
| Galpin, J. and Barratt, P. and Ashcroft, E. and Greathead, S. and Kenny, L. and Pellicano, E. | 2018 | 'The dots just don't join up': Understanding the support needs of families of children on the autism spectrum |
| Gant, V. | 2017 | Reflections on a birthday: An auto-ethnographic account of caring for a child with a learning disability |
| Gant, V. | 2018 | Siblings of adults with learning disabilities: An empirical study |
| Gaona, C. and Castro, S. and Palikara, O. | 2020 | The views and aspirations of young people with autism spectrum disorders and their provision in the new Education Health and Care plans in England |
| Gareth Martin, Thomas | 2022 | A legacy of silence: the intersections of medical sociology and disability studies |
| Garz√≥n D√≠az, K. D. R. and Goodley, D. | 2021 | Teaching disability: strategies for the reconstitution of disability knowledge |
| Gehring, N. D. and McGrath, P. and Wozney, L. and Soleimani, A. and Bennett, K. and Hartling, L. and Huguet, A. and Dyson, M. P. and Newton, A. S. | 2017 | Pediatric eMental healthcare technologies: a systematic review of implementation foci in research studies, and government and organizational documents |
| Georgeson, J. and Porter, J. and Daniels, H. and Feiler, A. | 2014 | Consulting young children about barriers and supports to learning |
| Gibbs, D. and Harniess, P. and Crossley, S. L. | 2019 | "the constant by our side" - Mothers' experiences of early intervention therapy services for infants with emerging signs of complex Neurodevelopmental Difficulties |
| Gibbs, S. and Elliott, J. | 2015 | The differential effects of labelling: how do ‚dyslexia, and reading difficulties affect teachers’ beliefs |
| Gilbert, D. J. and Mukherjee, R. A. S. and Kassam, N. and Cook, P. A. | 2021 | Exploring the experiences of social workers in working with children suspected to have fetal alcohol spectrum disorders |
| Gilburt, H. and Drummond, C. and Sinclair, J. | 2015 | Navigating the Alcohol Treatment Pathway: A Qualitative Study from the Service Users' Perspective |
| Gill, R. and Younie, S. | 2021 | Evaluating eye tracking technology for assessment of students with profound and multiple learning difficulties |
| Gillard, S. and White, R. and Miller, S. and Turner, K. | 2015 | Open access support groups for people experiencing personality disorders: do group members' experiences reflect the theoretical foundations of the SUN project? |
| Girela-Serrano, B. and Migu√©lez, C. and Porras-Segovia, A. A. and D√≠az, C. and Moreno, M. and Pe√±uelas-Calvo, I. and Rosell√≥, R. and Baca-Garc√≠a, E. and Carballo, J. J. | 2022 | Predictors of mental health service utilization as adolescents with attention deficit hyperactivity disorder transition into adulthood |
| Giri, A. and Aylott, J. and Giri, P. and Ferguson-Wormley, S. and Evans, J. | 2022 | Lived experience and the social model of disability: conflicted and inter-dependent ambitions for employment of people with a learning disability and their family carers |
| Glazzard, J. | 2014 | The standards agenda: Reflections of a special educational needs co-ordinator |
| Goldschmied, Anita and McClimens, Alex | 2015 | How nursing students can empower professionals |
| Gon√ßalves, Ana-Carolina Vieira and J√°come, Cristina Isabel Oliveira and Demain, Sara Holtum and Hunt, Katherine J. and Marques, Alda Sofia Pires de Dias | 2017 | Burden of treatment in the light of the international classification of functioning, disability and health: a ‘best fit’ framework synthesis |
| Goodall, C. | 2018 | ‘I felt closed in and like I couldn’t breathe’: A qualitative study exploring the mainstream educational experiences of autistic young people |
| Goodall, C. | 2019 | ‘There is more flexibility to meet my needs’: Educational experiences of autistic young people in Mainstream and Alternative Education Provision |
| Goodall, C. | 2020 | Inclusion is a feeling, not a place: a qualitative study exploring autistic young people‚Äôs conceptualisations of inclusion |
| Goodall, C. and MacKenzie, A. | 2019 | Title: what about my voice? Autistic young girls’ experiences of mainstream school |
| Goodall, Craig | 2018 | Mainstream is not for all: the educational experiences of autistic young people |
| Goodwin, J. and Lecouturier, J. and Smith, J. and Crombie, S. and Basu, A. and Parr, J. R. and Howel, D. and McColl, E. and Roberts, A. and Miller, K. and Cadwgan, J. | 2019 | Understanding frames: A qualitative exploration of standing frame use for young people with cerebral palsy in educational settings |
| Gore Langton, E. and Frederickson, N. | 2016 | Mapping the educational experiences of children with pathological demand avoidance |
| Gore Langton, E. and Frederickson, N. | 2018 | Parents’ experiences of professionals’ involvement for children with extreme demand avoidance |
| Gore, Nick and et, al | 2015 | Residential school placements for children and young people with intellectual disabilities: their use and implications for adult social care |
| Gough Kenyon, S. M. and Palikara, O. and Lucas, R. M. | 2022 | Predictors of school concern across the transition to secondary school with developmental language disorder and low language ability: A longitudinal developmental cascade analysis |
| Grady-Dominguez, P. and Ihrig, K. and Lane, S. J. and Aberle, J. and Beetham, K. and Ragen, J. and Spencer, G. and Sterman, J. and Tranter, P. and Wyver, S. and Bundy, A. and Hepburn, S. | 2020 | Reframing risk: Working with caregivers of children with disabilities to promote risk-taking in play |
| Gralton, E. | 2013 | Inpatient assessment of young people with developmental disabilities who offend |
| Gray, L. and Bownas, E. and Hicks, L. and Hutcheson-Galbraith, E. and Harrison, S. | 2021 | Towards a better understanding of girls on the Autism spectrum: educational support and parental perspectives |
| Greenwood, J. and Kelly, C. | 2020 | Taking a cooperative inquiry approach to developing person-centred practice in one English secondary school |
| Grey, J. M. and Griffith, G. M. and Totsika, V. and Hastings, R. P. | 2015 | Families' experiences of seeking out-of-home accommodation for their adult child with an intellectual disability |
| Gridley, Kate and Brooks, Jenni and Glendinning, Caroline | 2014 | Good practice in social care: the views of people with severe and complex needs and those who support them |
| Griffith, Gemma Maria and et, al | 2013 | Receiving an assessment and a potential diagnosis on the autistic spectrum: a thematic content analysis of parental experiences |
| Groves, E. A. and May, R. J. and Rees, R. E. and Austin, J. L. | 2022 | Adapting the good behavior game for special education classrooms |
| Guerin, Suzanne and Kiernan, Gemma and Courtney, Eileen and McQuillan, Regina and Ryan, Karen | 2020 | Integration of palliative care in services for children with life-limiting neurodevelopmental disabilities and their families: a Delphi study |
| Guldberg, K. and Parsons, S. and Porayska-Pomsta, K. and Keay-Bright, W. | 2017 | Challenging the knowledge-transfer orthodoxy: Knowledge co-construction in technology-enhanced learning for children with autism |
| Gumm, R. and Thomas, E. and Lloyd, C. and Hambly, H. and Tomlinson, R. and Logan, S. and Morris, C. | 2017 | Improving communication between staff and disabled children in hospital wards: Testing the feasibility of a training intervention developed through intervention mapping |
| Gupta, J. and Hassiotis, A. and Bohnen, I. and Thakker, Y. | 2015 | Application of community treatment orders (CTOs) in adults with intellectual disability and mental disorders |
| Gwernan-Jones, R. and Moore, D. A. and Cooper, P. and Russell, A. E. and Richardson, M. and Rogers, M. and Thompson-Coon, J. and Stein, K. and Ford, T. J. and Garside, R. | 2016 | A systematic review and synthesis of qualitative research: the influence of school context on symptoms of attention deficit hyperactivity disorder |
| Hall, C. L. and Newell, K. and Taylor, J. and Sayal, K. and Hollis, C. | 2015 | Services for young people with attention deficit/hyperactivity disorder transitioning from child to adult mental health services: a national survey of mental health trusts in England |
| Hall, C. L. and Newell, K. and Taylor, J. and Sayal, K. and Swift, K. D. and Hollis, C. | 2013 | 'Mind the gap'--mapping services for young people with ADHD transitioning from child to adult mental health services |
| Hallett, F. and Armstrong, D. | 2013 | 'I want to stay over': A phenomenographic analysis of a short break/extended stay pilot project for children and young people with Autism |
| Hallett, N. and Huber, J. and Sixsmith, J. and Dickens, G. L. | 2018 | Measuring the violence prevention climate: Development and evaluation of the VPC-14 |
| Hardiman, B. | 2020 | Commentary on: ‘Ordinary lives’ means ordinary schools: towards a unitary 0-99 years policy for adults and children with learning disabilities |
| Hardy, C. and Hackett, E. and Murphy, E. and Cooper, B. and Ford, T. and Conroy, S. | 2015 | Mental health screening and early intervention: clinical research study for under 5-year-old children in care in an inner London borough |
| Hargreaves, S. and Holton, S. and Baxter, R. and Burgoyne, K. | 2021 | Educational experiences of pupils with Down syndrome in the UK |
| Harland, J. M. and Adams, E. A. and Boobis, S. and Cheetham, M. and Wiseman, A. and Ramsay, S. E. | 2022 | Understanding the life experiences of people with multiple complex needs: peer research in a health needs assessment |
| Harris, Neville and Davidge, Gail | 2019 | The rights of children and young people under special educational needs legislation in England: an inclusive agenda? |
| Harrison, R. and Willis, S. | 2015 | Antenatal support for people with learning disabilities |
| Hart, T. and O'Reilly, M. | 2018 | 'The challenges of sharing information when a young person is experiencing severe emotional difficulties': implications for schools and CAMHS |
| Hart, T. and O‚ÄôReilly, M. | 2022 | Perspectives on what schools and mental health services can do about bullying of adolescents with severe emotional health conditions |
| Harvey, H. and Ashworth, M. and Palikara, O. and Van Herwegen, J. | 2020 | The Underreporting of Vision Problems in Statutory Documents of Children with Williams Syndrome and Down Syndrome |
| Harvey, H. and Spencer, S. | 2019 | Specialist provision for language disorder: Staff and service user views of a preschool language unit |
| Hassan, Nedim | 2017 | "Putting Music On": Everyday Leisure Activities, Choice-Making and Person-Centred Planning in a Supported Living Scheme |
| Hasson, L. and Keville, S. and Gallagher, J. and Onagbesan, D. and Ludlow, A. K. | 2022 | Inclusivity in education for autism spectrum disorders: Experiences of support from the perspective of parent/carers, school teaching staff and young people on the autism spectrum |
| Hayes, J. and Ford, T. and Rafeeque, H. and Russell, G. | 2018 | Clinical practice guidelines for diagnosis of autism spectrum disorder in adults and children in the UK: a narrative review |
| Hayes, L. | 2017 | Sound, Electronics, and Music: A Radical and Hopeful Experiment in Early Music Education |
| Heady, N. and Watkins, A. and John, A. and Hutchings, H. | 2022 | The challenges that social care services face in relation to looked after children with neurodevelopmental disorders: A unique insight from a social worker perspective |
| Hebron, J. and Humphrey, N. | 2014 | Mental health difficulties among young people on the autistic spectrum in mainstream secondary schools: A comparative study |
| Hebron, J. and Humphrey, N. | 2014 | Exposure to bullying among students with autism spectrum conditions: a multi-informant analysis of risk and protective factors |
| Heer, K. and Rose, J. and Larkin, M. | 2012 | Understanding the experiences and needs of South Asian families caring for a child with learning disabilities in the United Kingdom: An experiential-contextual framework |
| Heer, K. and Rose, J. and Larkin, M. | 2016 | The Challenges of Providing Culturally Competent Care Within a Disability Focused Team: A Phenomenological Exploration of Staff Experiences |
| Heer, Kuljit and Rose, John and Larkin, Michael | 2016 | The Challenges of Providing Culturally Competent Care Within a Disability Focused Team |
| Hellawell, B. | 2015 | Ethical accountability and routine moral stress in Special Educational Needs professionals |
| Hemmings, C. and Al-Sheikh, A. | 2013 | Expert opinions on community services for people with intellectual disabilities and mental health problems |
| Hemmings, L. and Soundy, A. | 2020 | Experiences of physiotherapy in mental health: an interpretative phenomenological analysis of barriers and facilitators to care |
| Henderson, Fiona and et, al | 2018 | From charity to social enterprise: the marketization of social care |
| Heslop, Philip and McAnelly, Su and Wilcockson, Jane and Newbold, Yvonne and Avantaggiato-Quinn, Maria and Meredith, Cathryn | 2019 | Do parents and carers experiencing violent and challenging behaviour from their children fit with safeguarding models of support? Messages from a Facebook study |
| Hewett, Rachel and Douglas, Graeme and Keil, Sue | 2014 | Post-16 transition experience of visually impaired young people in England and Wales: early findings from a longitudinal study |
| Heyman, A. and Heyman, B. | 2013 | 'The sooner you can change their life course the better': the time-framing of risks in relationship to being a young carer |
| Higson-Sweeney, N. and Loades, M. E. and Hiller, R. and Read, R. | 2020 | Addressing sleep problems and fatigue within child and adolescent mental health services: A qualitative study |
| Hill, C. and Keville, S. and Ludlow, A. K. | 2021 | Inclusivity for children with autism spectrum disorders: Parents’ reflections of the school learning environment versus home learning during COVID-19 |
| Hillis, Rowan and et, al | 2016 | The role of care coordinator for children with complex care needs: a systematic review |
| Hilton, K. and Turner, C. and Krebs, G. and Volz, C. and Heyman, I. | 2012 | Parent experiences of attending a specialist clinic for assessment of their child's obsessive compulsive disorder |
| Hind, K. and Larkin, R. and Dunn, A. K. | 2019 | Assessing Teacher Opinion on the Inclusion of Children with Social, Emotional and Behavioural Difficulties into Mainstream School Classes |
| Hingley-Jones, H. | 2013 | Emotion and relatedness as aspects of the identities of adolescents with severe learning disabilities: Contributions from 'practice-near' social work research |
| Hitchcock, Gill | 2014 | Flying colours |
| Hodes, M. and Vostanis, P. | 2019 | Practitioner Review: Mental health problems of refugee children and adolescents and their management |
| Hodgekins, J. and Clarke, T. and Cole, H. and Markides, C. and Ugochukwu, U. and Cairns, P. and Lower, R. and Fowler, D. and Wilson, J. | 2017 | Pathways to care of young people accessing a pilot specialist youth mental health service in Norfolk, United Kingdom |
| Hodgetts, Sandra and Richards, Kathryn and Park, Elly | 2018 | Preparing for the future: multi-stakeholder perspectives on autonomous goal setting for adolescents with autism spectrum disorders |
| Hoerold, Doreen | 2013 | Correlates of adolescent fore setting: examining the role of fire interest, attentional bias, impulsivity and empathy |
| Hogg, K. and Thetford, C. and Wheeler, S. L. and York, S. and Moxon, R. and Robinson, J. | 2017 | Habilitation provision for children and young people with vision impairment in the United Kingdom: A lack of clarity leading to inconsistencies |
| Holloway, M. and Tasker, R. | 2019 | The Experiences of Relatives of People with Acquired Brain Injury (ABI) of the Condition and Associated Social and Health Care Services |
| Holloway, M. and Tyrrell, L. | 2016 | Acquired Brain Injury, Parenting, Social Work, and Rehabilitation: Supporting Parents to Support Their Children |
| Holmes, S. | 2018 | The role of sociocultural perspectives in eating disorder treatment: A study of health professionals |
| Holttum, Sue | 2016 | Mental health, human rights and social inclusion for adults and children |
| Homeyard, Claire and Montgomery, Elsa and Chinn, Deborah and Patelarou, Evridiki | 2016 | Current evidence on antenatal care provision for women with intellectual disabilities: A systematic review |
| Horrell, Jane and Lloyd, Helen and Sugavanam, Thavapriya and Close, James and Byng, Richard | 2018 | Creating and facilitating change for Person-Centred Coordinated Care (P3C): The development of the Organisational Change Tool (P3C‚ÄêOCT) |
| Hoskins, K. and Bradbury, A. and Fogarty, L. | 2021 | A frontline service? Nursery Schools as local community hubs in an era of austerity |
| Hotham, S. and Hamilton-West, K. E. and Hutton, E. and King, A. and Abbott, N. | 2017 | A study into the effectiveness of a postural care training programme aimed at improving knowledge, understanding and confidence in parents and school staff |
| Hotham, S. and Hutton, E. and Hamilton-West, K. E. | 2015 | Development of a reliable, valid measure to assess parents' and teachers' understanding of postural care for children with physical disabilities: the (UKC PostCarD) questionnaire |
| Hovish, K. and Weaver, T. and Islam, Z. and Paul, M. and Singh, S. P. | 2012 | Transition experiences of mental health service users, parents, and professionals in the United Kingdom: a qualitative study |
| Howard, K. and MacQuarrie, S. | 2022 | Perspectives of Care Experienced Young People Regarding Their Academic Experiences in Further Education |
| Howard, K. B. and Katsos, N. and Gibson, J. L. | 2021 | Practitioners' perspectives and experiences of supporting bilingual pupils on the autism spectrum in two linguistically different educational settings |
| Howell, M. and Bailey, T. and Bradshaw, J. and Langdon, P. E. | 2021 | The preliminary validity and reliability of the Assessment of Barriers to Learning in Education - Autism |
| Howell, M. and Bradshaw, J. and Langdon, P. E. | 2021 | A Systematic Review of Behaviour-Related Outcome Assessments for Children on the Autism Spectrum with Intellectual Disabilities in Education Settings |
| Howes, A. E. and Burns, M. E. and Surtees, A. D. R. | 2021 | Barriers, Facilitators, and Experiences of the Autism Assessment Process: A Systematic Review of Qualitative Research With Health Professionals |
| Howison, J. and Anker-Peterson, S. and Cooney, G. | 2016 | The impact of waiting times and social deprivation on attendance and engagement within learning disability child and adolescent mental health services |
| Hoy, K. and Parsons, S. and Kovshoff, H. | 2018 | Inclusive school practices supporting the primary to secondary transition for autistic children: pupil, teacher, and parental perspectives |
| Huggett, Charlotte and Birtel, Mich√®le D. and Awenat, Yvonne F. and Fleming, Paul and Wilkes, Sophie and Williams, Shirley and Haddock, Gillian | 2018 | A qualitative study: experiences of stigma by people with mental health problems |
| Hughes, C. and Foley, S. and White, N. and Devine, R. T. | 2018 | School readiness in children with special educational needs and disabilities: Psychometric findings from a new screening tool, the Brief Early Skills, and Support Index |
| Hughes, J. and Davies, S. and Chester, H. and Clarkson, P. and Stewart, K. and Challis, D. | 2018 | Learning disability services: user views on transition planning |
| Hughes, Teresa and McGlade, Anne and Campbell, Killick | 2020 | Does Training Enhance Professional Practice in Infant Mental Health? |
| Hummerstone, H. and Parsons, S. | 2021 | What makes a good teacher? Comparing the perspectives of students on the autism spectrum and staff |
| Humphrey, N. and Wigelsworth, M. | 2012 | Modeling the factors associated with children's mental health difficulties in primary school: A multilevel study |
| Hunt, D. and Churchill, R. | 2013 | Diagnosing and managing anorexia nervosa in UK primary care: a focus group study |
| Hunter, C. and Maciver, D. and Howden, S. and Forsyth, K. and Adamson, A. and Bremner, L. | 2013 | Identification of a common language describing paediatric physiotherapy practice for children with additional support needs, to support communication with those outside the physiotherapy profession |
| Hunter, Stephanie and Craig, Eleanor and Shaw, Jake | 2019 | "Give it a Try": experiences of black, Asian and minority ethnic young men in a prison-based offender personality disorder service |
| Hurt, L. and Langley, K. and North, K. and Southern, A. and Copeland, L. and Gillard, J. and Williams, S. | 2019 | Understanding and improving the care pathway for children with autism |
| Hutchings, Judy | 2012 | From ABA to SPR: 30 years developing evidence based services for the treatment and prevention of conduct disorder in Wales |
| Iacono, Teresa and et, al | 2014 | A systematic review of hospital experiences of people with intellectual disability |
| Iemmi, V. and Knapp, M. and Gore, N. and Cooper, V. and Brown, F. J. and Reid, C. and Saville, M. and Rehill, A. and McGill, P. and McWade, P. and Sholl, C. and Biles, G. and Dillenburger, K. and Duprey, J. and Jones, S. and Roberts, B. and Whittuck, D. and Group, B. C. Delphi | 2016 | What is standard care for people with learning disabilities and behaviour that challenges and what does it cost? |
| Ilkhani, M. and Glasper, A. and Jarrett, N. | 2016 | Nursing curricula relating to care for disabled children: literature review |
| Jackson, L. and Keville, S. and Ludlow, A. K. | 2020 | Mothers’ Experiences of Accessing Mental Health Care for their Child with an Autism Spectrum Disorder |
| Jacobs, M. and Downie, H. and Kidd, G. and Fitzsimmons, L. and Gibbs, S. and Melville, C. | 2016 | Mental health services for children and adolescents with learning disabilities: a review of research on experiences of service users and providers |
| Jacobs, P. and MacMahon, K. and Quayle, E. | 2020 | Who decides? Transitions from school to adult services for and with young people with severe intellectual disabilities |
| Jacobs, P. and Quayle, E. and Wilkinson, H. and MacMahon, K. | 2021 | Relationships matter! Utilising ethics of care to understand transitions in the lives of adults with severe intellectual disabilities |
| Jacobs, Paula and MacMahon, Kenneth and Quayle, Ethel | 2018 | Transition from school to adult services for young people with severe or profound intellectual disability: A systematic review utilizing framework synthesis |
| James, Deborah Michelle and Hall, Alex and Lombardo, Chiara and McGovern, Will | 2016 | A Video Feedback Intervention for Workforce Development: Exploring Staff Perspective Using Longitudinal Qualitative Methodology |
| James, Neil | 2016 | Supporting carers during assessment and treatment unit admissions |
| James, Neil | 2016 | Family carers' experience of the need for admission of their relative with an intellectual disability to an Assessment and Treatment Unit |
| Jansen, Suzanne L. G. and Van Der Putten, Annette A. J. and Vlaskamp, Carla and Jansen, Suzanne Lg and van der Putten, Annette Aj | 2017 | Parents' experiences of collaborating with professionals in the support of their child with profound intellectual and multiple disabilities |
| Janssens, A. and Blake, S. and Eke, H. and Price, A. and Ford, T. | 2022 | Parenting roles for young people with attention-deficit/hyperactivity disorder transitioning to adult services |
| Janssens, A. and Eke, H. and Price, A. and Newlove-Delgado, T. and Blake, S. and Ani, C. and Asherson, P. and Beresford, B. and Emmens, T. and Hollis, C. and Logan, S. and Paul, M. and Sayal, K. and Young, S. and Ford, T. | 2020 |  |
| Jantz, P. B. | 2020 | Implementing environmental enrichment strategies to help children who have sustained a moderate or severe traumatic brain injury |
| Joffe, Victoria | 2015 | An International Perspective: Supporting Adolescents with Speech, Language, and Communication Needs in the United Kingdom |
| John, M. and Jeffries, F. W. and Acuna-Rivera, M. and Warren, F. and Simonds, L. M. | 2015 | Development of Measures to Assess Personal Recovery in Young People Treated in Specialist Mental Health Services |
| Johnson, C. and Viljoen, N. | 2017 | Experiences of two multidisciplinary team members of systemic consultations in a community learning disability service |
| Johnson, S. and Bamber, D. and Bountziouka, V. and Clayton, S. and Cragg, L. and Gilmore, C. and Griffiths, R. and Marlow, N. and Simms, V. and Wharrad, H. J. | 2019 | Improving developmental and educational support for children born preterm: evaluation of an e-learning resource for education professionals |
| Johnston, C. and Bradford, S. | 2019 | Alternative spaces of failure. Disabled ‘bad boys’ in alternative further education provision |
| Johnston, E. C. | 2015 | 'Counselling in complexity': The use of social constructionist ideas within a community-based approach to working with families affected by disability |
| Jones, C. and Stalker, K. and Franklin, A. and Fry, D. and Cameron, A. and Taylor, J. | 2017 | Enablers of help-seeking for deaf and disabled children following abuse and barriers to protection: a qualitative study |
| Jones, Kate | 2019 | Evaluating a Theoretical Framework for the Use of Music Therapy in the Treatment of Selective Mutism in Young Children : a Multiple Case Study |
| Jones, N. | 2013 | Good Enough Parents? Exploring Attitudes of Family Centre Workers Supporting and Assessing Parents with Learning Difficulties |
| Jones, P. and Lawson, H. | 2015 | Insights into teacher learning about pedagogy from an international group of teachers of students with severe intellectual disabilities |
| Joyce, C. and Greasley, P. and Weatherhead, S. and Seal, K. | 2019 | Beyond the Revolving Door: Long-Term Lived Experience of Eating Disorders and Specialist Service Provision |
| Kandeh, M. S. and Kandeh, M. K. and Martin, N. and Krupa, J. | 2020 | Autism in black, Asian and minority ethnic communities: a report on the first Autism Voice UK Symposium |
| Karim, K. and Cook, L. and O'Reilly, M. | 2014 | Diagnosing autistic spectrum disorder in the age of austerity |
| Kavanagh, G. and O‚ÄôHanrahan, S. and Hughes, G. and McNicholas, F. | 2015 | Review of clinical guidelines for children and adolescents with attention deficit hyperactivity disorder and their application to an Irish context |
| Kelbrick, M. and Radley, J. | 2013 | Forensic rehabilitation in Asperger syndrome: A case report |
| Kendall, L. and Taylor, E. | 2016 | ‘We can't make him fit into the system’: parental reflections on the reasons why home education is the only option for their child who has special educational needs |
| Kendall, Lynne | 2019 | Supporting children with Down syndrome within mainstream education settings: parental reflections |
| Kennedy, A. | 2013 | Education in custody: young males' perspectives |
| Kenten, Charlotte and Wray, Jo and Gibson, Faith and Russell, Jessica and Tuffrey‚ÄêWijne, Irene and Oulton, Kate | 2019 | To flag or not to flag: Identification of children and young people with learning disabilities in English hospitals |
| Kiernan, J. and Mitchell, D. and Stansfield, J. and Taylor, C. | 2019 | Mothers' perspectives on the lived experience of children with intellectual disability and challenging behaviour |
| Kilcoyne, S. and Rajan, S. M. and Dalton, L. and Judge, A. and Overton, S. and Wall, S. and Johnson, D. | 2021 | The Sensitivity and Specificity of Parental Report of Concern for Identifying Language Disorder in Children With Craniosynostosis |
| King, E. and Brown, D. and Petch, V. and Wright, A. | 2014 | Perceptions of support-seeking in young people attending a Youth Offending Team: an interpretative phenomenological analysis |
| Kingston, C. and Hibberd, C. and Ozsivadjian, A. | 2013 | Parent experiences of a specialist intervention service for mental health difficulties in children with autistic spectrum disorder |
| Kinnafick, F. E. and Papathomas, A. and Regoczi, D. | 2018 | Promoting exercise behaviour in a secure mental health setting: Healthcare assistant perspectives |
| Kinnaird, E. and Norton, C. and Stewart, C. and Tchanturia, K. | 2019 | Same behaviours, different reasons: what do patients with co-occurring anorexia and autism want from treatment? |
| Kirby, A. and Judge, D. | 2018 | Addressing the Inverse Care Law in Developmental Coordination Disorder and Related Neurodevelopmental Disorders |
| Kirk, S. and Fallon, D. and Fraser, C. and Robinson, G. and Vassallo, G. | 2015 | Supporting parents following childhood traumatic brain injury: a qualitative study to examine information and emotional support needs across key care transitions |
| Klingberg, Gunilla and Hallberg, Ulrika | 2012 | Oral health - not a priority issue A Grounded Theory analysis of barriers for young patients with disabilities to receive oral health care on the same premise as others |
| Kola, S. and Turner, J. and Dhingra, K. | 2015 | Challenging lives: An exploratory qualitative study of Quality of life in young adults living with a chronic neurological condition |
| Kolvenbach, Sarah and Fern√°ndez de la Cruz, Lorena and Mataix‚ÄêCols, David and Patel, Natasha and Jassi, Amita | 2018 | Perceived treatment barriers and experiences in the use of services for obsessive compulsive disorder across different ethnic groups: a thematic analysis |
| Koskina, Antonia and Arkell, Jamie and Butcher, Gerard and Currie, Alan and Gowers, Simon and Key, Adrienne and Millar, Harry and Nicholls, Dasha and Ringwood, Susan and Robinson, Paul and Venkatraman, Lakshmi and Wurr, Kate and Schmidt, Ulrike | 2012 | Service Providers' Perceptions of the Strengths and Prospective Improvements in UK Eating Disorder Services: Findings from a Royal College Survey |
| Kovshoff, Hanna and Williams, Sarah and Vrijens, May and Danckaerts, Marina and Thompson, Margaret and Yardley, Lucy and Hodgkins, Paul and Sonuga-barke, Edmund J. | 2012 | The decisions regarding ADHD management (DRAMa) study: uncertainties and complexities in assessment, diagnosis and treatment, from the clinician's point of view |
| Kucirkova, Natalia and Messer, David and Flewitt, Rosie | 2014 | Touching the virtual, touching the real: iPads and enabling literacy for students experiencing disability |
| Kyriakides, A. O. and Houssart, J. | 2016 | Paraprofessionals in Cyprus and England: perceptions of their role in supporting primary school mathematics |
| Lambe, J. and McNair, V. and Smith, R. | 2013 | Special educational needs, e-learning and the reflective e-portfolio: implications for developing and assessing competence in pre-service education |
| Lawrence, Z. | 2014 | Black African parents' experiences of an Educational Psychology Service |
| Lawson, Hazel and Norwich, Brahm and Nash, Tricia | 2013 | What trainees in England learn about teaching pupils with special educational needs/disabilities in their school-based work: the contribution of planned activities in one-year initial training courses |
| Lawson, K. and Parker, R. | 2020 | How do young people with education, health and care plans make sense of relationships during transition to further education and how might this help to prepare them for adulthood? |
| Le Boutillier, C. and Slade, M. and Lawrence, V. and Bird, V. J. and Chandler, R. and Farkas, M. and Harding, C. and Larsen, J. and Oades, L. G. and Roberts, G. and Shepherd, G. and Thornicroft, G. and Williams, J. and Leamy, M. | 2015 | Competing priorities: staff perspectives on supporting recovery |
| Legg, Hannah and Tickle, Anna | 2019 | UK parents' experiences of their child receiving a diagnosis of autism spectrum disorder: A systematic review of the qualitative evidence |
| Liang, Alicia and et, al | 2021 | Mixed perceptions of self-determination: struggles facing youth with disabilities transitioning from foster care |
| Lindsay, S. and Edwards, A. | 2013 | A systematic review of disability awareness interventions for children and youth |
| Lingard, J. and Cooper, V. and Connell, M. | 2013 | The personalisation challenge: Personalisation for people with learning disabilities and behaviour described as challenging |
| Livanou, M. and Singh, S. P. and Liapi, F. and Furtado, V. | 2020 | Mapping transitional care pathways among young people discharged from adolescent forensic medium secure units in England |
| Lloyd-Evans, B. and Sweeney, A. and Hinton, M. and Morant, N. and Pilling, S. and Leibowitz, J. and Killaspy, H. and Tanskanen, S. and Totman, J. and Armstrong, J. and Johnson, S. | 2015 | Evaluation of a community awareness programme to reduce delays in referrals to early intervention services and enhance early detection of psychosis |
| Lloyd, Jane and Carr, Zac and Corr, David and Knowles, Chris and Reed, Ellie and Sheehan, Daniel and Winstanley, Rosie | 2014 | One need, independent living |
| Lloyd, S. and Osborne, L. A. and Reed, P. | 2019 | Personal experiences disclosed by parents of children with Autism Spectrum Disorder: A YouTube analysis |
| Lynch, Sean and et, al | 2019 | Pediatric integrated behavioral health service delivery models: using a federal framework to assess levels of integration |
| Maciver, D. and Hunter, C. and Adamson, A. and Grayson, Z. and Forsyth, K. and McLeod, I. | 2020 | Development and Implementation of the CIRCLE Framework |
| Maciver, D. and Hunter, C. and Johnston, L. and Forsyth, K. | 2021 | Using stakeholder involvement, expert knowledge and naturalistic implementation to co-design a complex intervention to support children’s inclusion and participation in schools: The circle framework |
| MacKenzie, S. | 2012 | Its been a bit of a rollercoaster: Special educational needs, emotional labour and emotion work |
| Magon, R. K. and Latheesh, B. and M√ºller, U. | 2015 | Specialist adult ADHD clinics in East Anglia: Service evaluation and audit of NICE guideline compliance |
| Maher, A. | 2016 | Consultation, negotiation and compromise: The relationship between SENCos, parents and pupils with SEN |
| Marku, B. and Niolaki, G. and Terzopoulos, A. and Wood, C. | 2022 | Eastern European parents’ experiences of parenting a child with SEN in England |
| Martin, C. | 2021 | The influence of the inclusion of visually impaired pupils on teachers conceptualisations of inclusion and SEND |
| McCarron, R. H. and Watson, S. and Gracey, F. | 2019 | What do Kids with Acquired Brain Injury Want? Mapping Neuropsychological Rehabilitation Goals to the International Classification of Functioning, Disability and Health |
| McCarthy, Elaine and Guerin, Suzanne | 2022 | Family-centred care in early intervention: a systematic review of the processes and outcomes of family-centred care and impacting factors |
| McKay, K. and Kennedy, E. and Senior, R. and Scott, S. and Hill, J. and Doolan, M. and Woolgar, M. and Peeren, S. and Young, B. | 2020 | Informing the personalisation of interventions for parents of children with conduct problems: a qualitative study |
| McNeill, S. and Wilson, G. | 2017 | Use of direct payments in providing care and support to children with disabilities: Opportunities and concerns |
| McPhillips, T. and Shevlin, M. and Long, L. | 2012 | A right to be heard: Learning from learners with additional needs in literacy |
| Meikle, L. and Watt, D. | 2013 | Autism and Scottish education: information from data |
| Meirinhos, Ana Rodr√≠guez and Antol√≠n-Su√°rez, Luc√≠a and Oliva, Alfredo | 2016 | Service needs of families of adolescents with mental health difficulties |
| Mengoni, S. E. and Redman, S. | 2019 | Evaluating Health Visitors' Existing Knowledge of Down Syndrome and the Effect of a Training Workshop |
| Merrick, Rosalind | 2020 | Pupil participation in planning provision for special educational needs: teacher perspectives |
| Milnes, L. and Kendal, S. | 2017 | Involving young people with mental health problems in improving healthcare |
| Milosevic, Sarah and Brookes‚ÄêHowell, Lucy and Randell, Elizabeth and Williams‚ÄêThomas, Rhys and Delport, Sue and Busse, Monica and Gillespie, David and Ahuja, Alka S. and McKigney, Anne Marie and Glarou, Eleni and McNamara, Rachel | 2022 | Understanding the support experiences of families of children with autism and sensory processing difficulties: A qualitative study |
| Mintz, Joseph and Seleznyov, Sarah and Peacey, Nick and Brown, Chris and White, Sarah | 2021 | Evidence informed practice for autism, special educational needs and disability in schools: expanding the scope of the research learning community model of professional development |
| Mitchell, F. | 2015 | Facilitators and barriers to informed choice in self-directed support for young people with disability in transition |
| Mitchell, Wendy | 2012 | Parents' accounts: Factors considered when deciding how far to involve their son/daughter with learning disabilities in choice-making |
| Moir, T. and Johnson, J. | 2021 | Ensuring Quality Transitions From Early Years’ Establishments Into Primary Schools: Putting Research Into Practice |
| Morewood, G. D. and Bond, C. | 2012 | Understanding parental confidence in an inclusive high school: A pilot survey |
| Morris, C. and Blake, S. and Stimson, A. and Borek, A. and Maguire, K. | 2016 | Resources for parents raising a disabled child in the UK |
| Mounir, Viola and Gobrial, Ereny | 2021 | SPECIAL EDUCATION PRACTICES FOR CHILDREN WITH AUTISM SPECTRUM DISORDERS IN EGYPT AND ENGLAND: A COMPARATIVE STUDY |
| Mugweni, Esther and Lowenhoff, Catherine and Walker, Melita and Jaswal, Sabrena and Emrys‚ÄêJones, Angela and Adams, Cheryll and Kendall, Sally | 2020 | The feasibility of a multi-professional training to improve how health care professionals deliver different news to families during pregnancy and at birth |
| Mulholland, M. and O'Connor, U. | 2016 | Collaborative classroom practice for inclusion: perspectives of classroom teachers and learning support/resource teachers |
| Muraya, D. N. and Fry, D. | 2016 | Aftercare Services for Child Victims of Sex Trafficking: A Systematic Review of Policy and Practice |
| Murphy, C. | 2022 | If It's Not on the System, Then It Hasn't Been Done: ‘Ofsted Anxiety Disorder’ as a Barrier to Social Worker Discretion |
| Murray, R. | 2012 | Sixth Sense: The Disabled Children and Young People's Participation Project |
| Neville, R. D. and Makopoulou, K. and Hopkins, W. G. | 2020 | Effect of an Inclusive Physical Education (IPE) Training Workshop on Trainee Teachers' Self-Efficacy |
| Nguyen, Linda and et, al | 2020 | Understanding the essential components and experiences of youth with autism spectrum disorders in peer mentorship programmes during the transition to adulthood: a qualitative meta-ethnography |
| Nicholson, N. and Palaiologou, I. | 2016 | Early years foundation stage progress check at the age of two for early intervention in relation to speech and language difficulties in England: the voices of the team around the child |
| Nolan, A. D. and Hannah, E. F. S. | 2019 | Impact of training in Autism on inclusive practices |
| Norwood, K.W., Slayton, R. L. and Disabilities, Council on Children With | 2013 | Oral health care for children with developmental disabilities |
| Nye, E. and Gardner, F. and Hansford, L. and Edwards, V. and Hayes, R. and Ford, T. | 2016 | Classroom behaviour management strategies in response to problematic behaviours of primary school children with special educational needs: views of special educational needs coordinators |
| O'Brien, D. and Harvey, K. and Howse, J. and Reardon, T. and Creswell, C. | 2016 | Barriers to managing child and adolescent mental health problems: a systematic review of primary care practitioners' perceptions |
| Ogundele, M. O. | 2013 | Transitional care to adult ADHD services in a North West England district |
| Oulton, K. and Sell, D. and Gibson, F. | 2020 | Hospitalized children with intellectual disability: Parents as partners in their care |
| Oxley, C. and Moghraby, O. S. and Samuel, R. and Joyce, D. W. | 2018 | Improving the quality of physical health monitoring in CAMHS for children and adolescents prescribed medication for ADHD |
| Page, Andrea and Gayson, Charlotte and Vanes, Nicola and Ashmore, Paul and McDonnell, Andrew | 2017 | Determining the sensory needs of children with Hunter and Sanfilippo syndromes who need hospital treatment |
| Palikara, O. and Castro, S. and Gaona, C. and Eirinaki, V. | 2019 | Professionals’ views on the new policy for special educational needs in England: ideology versus implementation |
| Papoudi, D. and J√∏rgensen, C. R. and Guldberg, K. and Meadan, H. | 2021 | Perceptions, Experiences, and Needs of Parents of Culturally and Linguistically Diverse Children with Autism: a Scoping Review |
| Parker, C. and Paget, A. and Ford, T. and Gwernan-Jones, R. | 2016 | ‘he was excluded for the kind of behaviour that we thought he needed support with’: A qualitative analysis of the experiences and perspectives of parents whose children have been excluded from school |
| Pearson, C. and Watson, N. and Gangneux, J. and Norberg, I. | 2021 | Transition to where and to what? Exploring the experiences of transitions to adulthood for young disabled people |
| Pearson, S. and Mitchell, R. and Rapti, M. | 2015 | 'I will be "fighting" even more for pupils with SEN': SENCOs' role predictions in the changing English policy context |
| Peter, M. | 2021 | Professional development in drama with learners with special educational needs and disabilities (SEND) |
| Peters, R. and Brooks, R. | 2016 | Parental perspectives on the transition to secondary school for students with Asperger syndrome and high-functioning autism: A pilot survey study |
| Pickering, A. and Howarth, J. and Tomlinson, K. | 2015 | Reflections from Learning Disability Child and Adolescent Mental Health Service clinicians: Designing and delivering a pilot 'understanding emotions' group |
| Pickles, J. and Parsons, S. and Kovshoff, H. | 2022 | Knowledgeable but not specialist: Virtual School Heads’ experiences of supporting autistic children in care |
| Pillay, J. and Dunbar-Krige, H. and Mostert, J. | 2013 | Learners with behavioural, emotional and social difficulties' experiences of reintegration into mainstream education |
| Platt, I. A. and Kannangara, C. and Carson, J. and Tytherleigh, M. | 2021 | Heuristic assessment of psychological interventions in schools (HAPI Schools) |
| Porter, J. and Georgeson, J. and Daniels, H. and Martin, S. and Feiler, A. | 2013 | Reasonable adjustments for disabled pupils: what support do parents want for their child? |
| Porter, J. and Ingram, J. | 2021 | Changing the exclusionary practices of mainstream secondary schools: the experience of girls with SEND. 'I have some quirky bits about me that I mostly hide from the world' |
| Potter, C. | 2016 | ‘the most important thing ‚ I mean, the schooling’: father involvement in the education of children with autism |
| Potter, C. A. | 2017 | ‘I received a leaflet and that is all’: Father experiences of a diagnosis of autism |
| Pozzoli, F. | 2018 | Personalisation as vision and toolkit. A case study |
| Price, A. and Janssens, A. and Woodley, A. L. and Allwood, M. and Ford, T. | 2019 | Review: Experiences of healthcare transitions for young people with attention deficit hyperactivity disorder: a systematic review of qualitative research |
| Price, A. and Newlove-Delgado, T. and Eke, H. and Paul, M. and Young, S. and Ford, T. and Janssens, A. | 2019 | In transition with ADHD: the role of information, in facilitating or impeding young people's transition into adult services |
| Pryjmachuk, S. and Graham, T. and Haddad, M. and Tylee, A. | 2012 | School nurses' perspectives on managing mental health problems in children and young people |
| Pulsford, Mark | 2020 | ‘I could have been the caretaker in a suit’: men as primary school SENCos in an era of change |
| Pytlowana, A. and Stenfert Kroese, B. | 2020 | What are the experiences of professionals working with parents with learning disabilities? A meta-ethnography |
| Quinlan-Davidson, M. and Roberts, K. J. and Devakumar, D. and Sawyer, S. M. and Cortez, R. and Kiss, L. | 2021 | Evaluating quality in adolescent mental health services: a systematic review |
| Qureshi, S. | 2014 | Herding cats or getting heard: The SENCo-teacher dynamic and its impact on teachers' classroom practice |
| Qureshi, S. | 2015 | Key drivers of optimal special education needs provision: An English study |
| Radez, Jerica and Reardon, Tessa and Creswell, Cathy and Lawrence, Peter J. and Evdoka-Burton, Georgina and Waite, Polly | 2021 | Why do children and adolescents (not) seek and access professional help for their mental health problems? A systematic review of quantitative and qualitative studies |
| Radford, J. and Bosanquet, P. and Webster, R. and Blatchford, P. | 2015 | Scaffolding learning for independence: Clarifying teacher and teaching assistant roles for children with special educational needs |
| Raghavan, R. and Pawson, N. and Small, N. | 2013 | Family carers' perspectives on post-school transition of young people with intellectual disabilities with special reference to ethnicity |
| Ratheram, E. and Kelly, C. | 2021 | An exploration of the influences on work with minority cultural and linguistic communities within the practice of educational psychology in the United Kingdom |
| Rayner, S. M. | 2017 | Admissions policies and risks to equity and educational inclusion in the context of school reform in England |
| Rezel-Potts, E. and Kordowicz, M. and Downs, J. and White, P. and Prasad, V. | 2021 | Attention-deficit/hyperactivity disorder: parent/carer perceptions of barriers to healthcare access |
| Richardson, T. and Hannah, E. | 2016 | The Perspectives of Young People with Additional Support Needs of Post-School Transition Planning and Preparation |
| Riddell, S. and Carmichael, D. | 2019 | The biggest extension of rights in Europe? Needs, rights and children with additional support needs in Scotland |
| Rihtman, T. and Gadsby, N. and Porter, J. | 2022 | Supporting the social-emotional needs of children and young people with developmental coordination disorder: Occupational therapists’ perceptions of practice in England |
| Rix, J. and Sheehy, K. and Fletcher-Campbell, F. and Crisp, M. and Harper, A. | 2013 | Exploring provision for children identified with special educational needs: an international review of policy and practice |
| Robards, Fiona and Kang, Melissa and Usherwood, Tim and Sanci, Lena | 2018 | How Marginalized Young People Access, Engage With, and Navigate Health-Care Systems in the Digital Age: Systematic Review |
| Roberts-Tyler, E. J. and Beverley, M. and Hughes, J. C. and Hastings, R. P. | 2021 | Teaching conventional early reading skills to children with intellectual disabilities in special schools in the UK: a survey of current practices and perceived barriers |
| Roberts, H. and Ingold, A. and Liabo, K. and Manzotti, G. and Reeves, D. and Bradby, H. | 2018 | Moving on: Transitions out of care for young people with learning disabilities in England and Sweden |
| Roberts, J. and Crosland, A. and Fulton, J. | 2014 | Patterns of engagement between GPs and adolescents presenting with psychological difficulties: a qualitative study |
| Robertson, A. O. and Tadic, V. and Rahi, J. S. | 2018 | Transition from paediatric to adult ophthalmology services: what matters most to young people with visual impairment |
| Robinson, Deborah and Moore, Nicki and Hooley, Tristram | 2018 | Ensuring an independent future for young people with special educational needs and disabilities (SEND): a critical examination of the impact of education, health and care plans in England |
| Rogers, C. L. and Goddard, L. and Hill, E. L. and Henry, L. A. and Crane, L. | 2016 | Experiences of diagnosing autism spectrum disorder: A survey of professionals in the United Kingdom |
| Ronan, Sophie and Brown, Michael and Marsh, Lynne | 2020 | Parents' experiences of transition from hospital to home of a child with complex health needs: A systematic literature review |
| Ross, H. and Dodds, N. | 2022 | Exploring risk factors for admission to children's Learning Disability hospitals using interpretative phenomenological analysis |
| Rupasinha, J. | 2015 | Addressing an imbalance? Educational Psychologists' considerations of ethnic minority cultural factors in assessments for autistic spectrum condition |
| Salaheddin, K. and Mason, B. | 2016 | Identifying barriers to mental health help-seeking among young adults in the UK: a cross-sectional survey |
| Salt, Emily and Melville, Craig A. and Jahoda, Andrew | 2019 | Transitioning to adulthood with a mild intellectual disability - young people's experiences, expectations and aspirations |
| Sapiets, S. J. and Hastings, R. P. and Stanford, C. and Totsika, V. | 2022 | Families’ Access to Early Intervention and Supports for Children With Developmental Disabilities |
| Satherley, David and Norwich, Brahm | 2021 | Parents’ experiences of choosing a special school for their children |
| Shah, Sonali and Tsitsou, Lito and Woodin, Sarah | 2016 | ‘I can’t forget’: Experiences of violence and disclosure in the childhoods of disabled women |
| Shanahan, P. and Ollis, L. and Balla, K. and Patel, R. and Long, K. | 2021 | Experiences of transition from children's to adult's healthcare services for young people with a neurodevelopmental condition |
| Sharkey, Siobhan and Lloyd, Claire and Tomlinson, Richard and Thomas, Eleanor and Martin, Alice and Logan, Stuart and Morris, Christopher | 2016 | Communicating with disabled children when inpatients: barriers and facilitators identified by parents and professionals in a qualitative study |
| Sharma, P. | 2021 | Barriers faced when eliciting the voice of children and young people with special educational needs and disabilities for their Education, Health and Care Plans and Annual Reviews |
| Shaw, V. L. | 2016 | Liaison and diversion services: embedding the role of learning disability nurses |
| Sheffield, E. L. and Morgan, G. | 2017 | The perceptions and experiences of young people with a BESD/SEMH classification |
| Shields, N. and Synnot, A. | 2016 | Perceived barriers and facilitators to participation in physical activity for children with disability: a qualitative study |
| Shilling, V. and Edwards, V. and Rogers, M. and Morris, C. | 2012 | The experience of disabled children as inpatients: a structured review and synthesis of qualitative studies reporting the views of children, parents and professionals |
| Shimokura, R. and Yanagiawa, K. and Sasaki, S. | 2022 | Spatial organisation of therapeutical spaces for autistic children in special schools: lessons learnt from the united kingdom experience |
| Skellern, J. and Astbury, G. | 2014 | Gaining employment: The experience of students at a further education college for individuals with learning disabilities |
| Small, N. and Raghavan, R. and Pawson, N. | 2013 | An ecological approach to seeking and utilising the views of young people with intellectual disabilities in transition planning |
| Smillie, Amanda Lindsey and Felton, Anne | 2017 | Carers' experiences of caring for a loved one with an eating disorder |
| Smith, M. D. and Broomhead, K. E. | 2019 | Time, expertise and status: barriers faced by mainstream primary school SENCos in the pursuit of providing effective provision for children with SEND |
| Spear, S. and Spotswood, F. and Goodall, J. and Warren, S. | 2021 | Reimagining parental engagement in special schools’ practice theoretical approach |
| Spiers, G. | 2015 | Choice and caring: The experiences of parents supporting young people with Autistic Spectrum Conditions as they move into adulthood |
| Squires, G. and Humphrey, N. and Barlow, A. and Wigelsworth, M. | 2012 | The identification of special educational needs and the month of birth: Differential effects of category of need and level of assessment |
| Stalker, K. and MacDonald, C. and King, C. and McFaul, F. and Young, C. and Hawthorn, M. | 2015 | ‘We Could Kid On that This is Going to Benefit the Kids but No, This is about Funding’: Cutbacks in Services to Disabled Children and Young People in Scotland |
| Stalker, K. and Taylor, J. and Fry, D. and Stewart, A. B. R. | 2015 | A study of disabled children and child protection in Scotland - A hidden group? |
| Stanford, C. E. and Totsika, V. and Hastings, R. P. | 2020 | ‘Above and beyond: The perceptions of mothers of children with autism about ‘good practice’ by professionals and services |
| Stewart, C. and Walker-Gleaves, C. | 2020 | A narrative exploration of how curricula for children with profound and multiple learning difficulties shape and are shaped by the practices of their teachers |
| Stoll, M. and McLeod, J. | 2020 | Guidance teachers, and support staff's experience of working with pupils with mental health difficulties in two secondary schools: an IPA study |
| Sutton, Paul and Kupara, Dorothy | 2022 | Meeting the mental health needs of a young person with an intellectual disability: a case study |
| Swanwick, Ruth A. and Kitchen, Ruth and Clarke, Paula J. | 2012 | Practitioner Talk on Deaf Children's Reading Comprehension: Analysing Multiple Voices |
| Swift, K. D. and Hall, C. L. and Marimuttu, V. and Redstone, L. and Sayal, K. and Hollis, C. | 2013 | Transition to adult mental health services for young people with attention deficit/hyperactivity disorder (ADHD): a qualitative analysis of their experiences |
| Symes, W. and Humphrey, N. | 2012 | Including pupils with autistic spectrum disorders in the classroom: The role of teaching assistants |
| T, Rihtman and N, Gadsby and C, Campion | 2017 | Occupational therapy service delivery in the UK for children and young people with Developmental Coordination Disorder (DCD)...RCOT (Royal College of Occupational Therapist) Annual Conference 2017 |
| Tadiƒá, V. and Hundt, G. Lewando and Keeley, S. and Rahi, J. S. | 2015 | Seeing it my way: living with childhood onset visual disability |
| Tanner, L. and McGlade, A. and Irwin, M. | 2021 | Engagement and inclusion of individuals with a dual sensory loss and learning disability in the assessment process-staff perspectives |
| Tarantino, G. and Makopoulou, K. and Neville, R. D. | 2022 | Inclusion of children with special educational needs and disabilities in physical education: A systematic review and meta-analysis of teachers’ attitudes |
| Tatlow-Golden, Mimi and Prihodova, Lucia and Gavin, Blanaid and Cullen, Walter and McNicholas, Fiona | 2016 | What do general practitioners know about ADHD? Attitudes and knowledge among first-contact gatekeepers: systematic narrative review |
| Taylor, H. and Pennington, L. and Morris, C. and Craig, D. and McConachie, H. and Cadwgan, J. and Sellers, D. and Andrew, M. and Smith, J. and Garland, D. and McColl, E. and Buswell, C. and Thomas, J. and Colver, A. and Parr, J. | 2022 | Developing the FEEDS toolkit of parent-delivered interventions for eating, drinking and swallowing difficulties in young children with neurodisability: Findings from a Delphi survey and stakeholder consultation workshops |
| Taylor, L. and Creswell, C. and Pearcey, S. and Brooks, E. and Leigh, E. and Stallard, P. and Waite, P. and Clark, D. M. and Stephens, G. and Larkin, M. | 2021 | Delivering cognitive therapy for adolescent social anxiety disorder in NHS CAMHS: A qualitative analysis of the experiences of young people, their parents and clinicians-in-training |
| Thomas, Nigel and Pilgrim, David and Street, Cathy and Larsen, John | 2012 | Supporting young people with mental health problems: lessons from a voluntary sector pilot |
| Thompson, Ian and Tawell, Alice and Daniels, Harry | 2021 | Conflicts in professional concern and the exclusion of pupils with SEMH in England |
| Thompson, S. and Atkinson, C. | 2022 | Practitioners' views about effective mental health and well-being support for post-16 students attending special school |
| Timonen-Kallio, Eeva | 2019 | Interprofessional collaboration between residential child care and mental care practitioners: a cross-country study in six European countries |
| Toye, M. K. and Wilson, C. and Wardle, G. A. | 2019 | Education professionals’ attitudes towards the inclusion of children with ADHD: the role of knowledge and stigma |
| Unigwe, S. and Buckley, C. and Crane, L. and Kenny, L. and Remington, A. and Pellicano, E. | 2017 | GPs' confidence in caring for their patients on the autism spectrum: an online self-report study |
| Van Herwegen, J. and Ashworth, M. and Palikara, O. | 2018 | Parental views on special educational needs provision: Cross-syndrome comparisons in Williams Syndrome, Down Syndrome, and Autism Spectrum Disorders |
| Van Herwegen, J. and Ashworth, M. and Palikara, O. | 2019 | Views of professionals about the educational needs of children with neurodevelopmental disorders |
| Vaz, I. | 2013 | Visual symbols in healthcare settings for children with learning disabilities and autism spectrum disorder |
| Vickerman, P. and Blundell, M. | 2012 | English learning support assistants' experiences of including children with special educational needs in physical education |
| Vincent, J. and Ralston, K. | 2020 | Trainee teachers’ knowledge of autism: implications for understanding and inclusive practice |
| Vivash, J. and Morgan, G. | 2019 | The Role of Educational Psychologists in Fuelling the Narrative of the ‘Velcro TA’ |
| Wadman, R. and Glazebrook, C. and Parkes, E. and Jackson, G. M. | 2016 | Supporting students with Tourette syndrome in secondary school: a survey of staff views |
| Wales, J. and Brewin, N. and Raghavan, R. and Arcelus, J. | 2017 | Exploring barriers to South Asian help-seeking for eating disorders |
| Wales, J. and Brewin, N. and Susi, K. and Eivors, A. and Whight, D. and Leatherland, R. | 2021 | Experience of transition between a child and adolescent service and adult service for the treatment of eating disorders |
| Wales, Jackie and Brewin, Nicola and Williamson, Iain and ≈†tick√Ω, Jakub and Lawrence, Rachael and Eivors, Alison | 2022 | Transitioning services for eating disorder treatment, the relative importance of factors from patient, carer and clinician perspectives: a Q-methodology study |
| Walker, C. | 2013 | Support needed for new mothers with mental illness |
| Walsh, B. and Dinning, T. and Money, J. and Money, S. and Maher, A. | 2018 | Supporting reasonable adjustments for learners with disabilities in physical education: An investigation into teachers’ perceptions of one online tool |
| Waltz, M. M. | 2015 | Mothers and autism: the evolution of a discourse of blame |
| Walz, Amber and Wang, Mian and Bianchini, Julie | 2019 | Parental perspectives on successful parent education and behavioral intervention |
| Ware, J. | 2019 | Autonomy, rights and children with special educational needs: the distinctiveness of Wales |
| Warnes, E. and Done, E. J. and Knowler, H. | 2022 | Mainstream teachers’ concerns about inclusive education for children with special educational needs and disability in England under pre-pandemic conditions |
| Warren, A. and Buckingham, K. and Parsons, S. | 2021 | Everyday experiences of inclusion in Primary resourced provision: the voices of autistic pupils and their teachers |
| Webb, E. J. D. and Meads, D. and Lynch, Y. and Randall, N. and Judge, S. and Goldbart, J. and Meredith, S. and Moulam, L. and Hess, S. and Murray, J. | 2019 | What's important in AAC decision making for children? Evidence from a best-worst scaling survey |
| Webb, H. and Schmidt, U. | 2021 | Facilitators and barriers to supporting young people with eating disorders during their transition to, and time at, university: An exploration of clinicians' perspectives |
| Webster, R. and Blatchford, P. | 2013 | The educational experiences of pupils with a Statement for special educational needs in mainstream primary schools: results from a systematic observation study |
| Webster, R. and Blatchford, P. | 2019 | Making sense of teaching, support and ‘differentiation’: the educational experiences of pupils with Education, Health and Care Plans and Statements in mainstream secondary schools |
| Wee, C. and Mottershead, T. and Wright, S. and Jaydeokar, S. and Odiyoor, M. | 2020 | Developing a model for mental health services for children and young people with intellectual disability and/or autism in North West England |
| Welch, V. and Collins, M. and Hatton, C. and Emerson, E. and Robertson, J. and Wells, E. and Langer, S. | 2014 | Short break and respite services for disabled children in England: Comparing children's and parents' perspectives of their impact on children |
| Welsh, P. and Pickering, C. | 2020 | Exploring the use of cognitive assessments in a child and adolescent attention deficit hyperactivity disorder diagnostic team |
| Welsh, P. and Tiffin, P. A. | 2012 | Experience of child and adolescent mental health clinicians working within an at-risk mental state for psychosis service: a qualitative study |
| Westbrook, John D. and et, al | 2015 | Transition services for youth with autism: a systematic review |
| Whalley, S. | 2018 | A Tale of Three SENCOS, post 2015 Reforms |
| Whitaker, E. M. | 2015 | Personalisation in children's social work: From family support to "the child's budget" |
| Whiting, M. | 2013 | Impact, meaning and need for help and support: The experience of parents caring for children with disabilities, life-limiting/life-threatening illness or technology dependence |
| Whiting, M. | 2019 | Caring for children - '24-7': The experience of WellChild Nurses and the families for whom they are providing care and support |
| Whiting, M. | 2014 | Support requirements of parents caring for a child with disability and complex health needs |
| Wilhelmsen, Terese and S√∏rensen, Marit | 2019 | Physical education-related home-school collaboration: The experiences of parents of children with disabilities |
| Williams-Brown, Z. and Hodkinson, A. | 2021 | ‘What is considered good for everyone may not be good for children with Special Educational Needs and Disabilities’ teachers’ perspectives on inclusion in England |
| Willingham-Storr, G. L. | 2014 | Parental experiences of caring for a child with intellectual disabilities: A UK perspective |
| Wilson, C. and Woolfson, L. M. and Durkin, K. | 2022 | The impact of explicit and implicit teacher beliefs on reports of inclusive teaching practices in Scotland |
| Wilson, Charlotte | 2016 | You tell me what we can do after this: findings and recommendations for the participation of young people with learning disabilities |
| Wilson, S. and Attrill, M. and Critchley, T. and Clements, D. and Hornsby, J. and Mullen, C. and Miller, D. and Redfern, P. and Richardson, T. and Stow, L. and Young, A. | 2018 | Safeguarding Deaf Children: A Multi-agency Focus on Actions for Change |
| Wilson, S. and Metcalfe, J. and McLeod, S. | 2015 | Comparing Choice and Partnership Approach assumptions to Child and Adolescent Mental Health Services in NHS Greater Glasgow and Clyde |
| Winter, S. and Bunn, H. | 2019 | Work to be done? A survey of educational psychologists’ contribution to special schools for profound and multiple learning difficulties |
| Wood, R. | 2021 | Autism, intense interests and support in school: from wasted efforts to shared understandings |
| Wood, R. and Happé, F. | 2021 | What are the views and experiences of autistic teachers? Findings from an online survey in the UK |
| Wood, R. and Stockton, D. and Brown, H. | 2013 | Moving from a universal to targeted child health programme: which children receive enhanced care? A population-based study using routinely available data |
| Woods, K. and Stothard, J. and Lydon, J. and Reason, R. | 2013 | Developing policy and practice for dyslexia across a local authority: A case study of educational psychology practice at organisational level |
| Woody, Charlotte and Baxter, Amanda and Wright, Eryn and Gossip, Kate and Leitch, Elizabeth and Whiteford, Harvey and Scott, James G. | 2019 | Review of services to inform clinical frameworks for adolescents and young adults with severe, persistent and complex mental illness |
| Wray, J. and Lindsay, B. and Crozier, K. and Andrews, L. and Leeson, J. | 2013 | Exploring perceptions of psychological services in a children's hospice in the United Kingdom |
| Wren, Y. and Pagnamenta, E. and Peters, T. J. and Emond, A. and Northstone, K. and Miller, L. L. and Roulstone, S. | 2021 | Educational outcomes associated with persistent speech disorder |
| Wright, E. and Smith, R. and Vernon, M. and Wall, R. and White, L. | 2021 | Inclusive, multi-partner co-creation for the teaching of special educational needs and disabilities in higher education |
| Wright, K. and Stead, J. and Riddell, S. and Weedon, E. | 2012 | Parental experiences of dealing with disputes in Additional Support Needs in Scotland: Why are parents not engaging with mediation? |
| Wright, N. and Moldavsky, M. and Schneider, J. and Chakrabarti, I. and Coates, J. and Daley, D. and Kochhar, P. and Mills, J. and Sorour, W. and Sayal, K. | 2015 | Practitioner Review: Pathways to care for ADHD - a systematic review of barriers and facilitators |
| Wurr, J. | 2012 | Have I got it wrong or is it them? Difficulties in access to specialist brain injury social work services |
| Yardley, C. and Hynes, K. and Charley, A. and Sirkia-Weaver, S. and Critcher, J. and Hughes, L. and Banks, E. and Arnott, J. and Woodhouse, T. and Lyttle, A. | 2020 | Evaluating interprofessional education: initial learning from a domestic abuse conference |
| Yazici, M. S. and Stancer, B. | 2020 | Influences, Views and Practices Associated with Life Skills Education for Children with Autism in Two Cities in Turkey and England |
| Yesilkaya, E. and Best, P. and Byrne, B. and Marshall, G. | 2021 | The Barriers and Facilitators to the Implementation of Interventions for Children with Visual Impairments, Their Parents/Guardians or Educators: A Systematic Scoping Review |
| Yeung, E. Y. W. and Irvine, F. and Ng, S. M. and Tsang, K. M. S. | 2017 | How people from Chinese backgrounds make sense of and respond to the experiences of mental distress: Thematic analysis |
| Yeung, Echo Yuet Wah and Partridge, Martin and Irvine, Fiona | 2016 | Satisfaction with social care: the experiences of people from Chinese backgrounds with physical disabilities |
| Zacharia, Alice and Taylor, Billie Lever and Sweeney, Angela and Morant, Nicola and Howard, Louise M. and Johnson, Sonia | 2021 | Mental Health Support in the Perinatal Period for Women With a Personality Disorder Diagnosis: A Qualitative Study of Women's Experiences |
| Zalsman, Gil and Shilton, Tal | 2016 | Adult ADHD: A new disease? |
| Zamkowska, Anna | 2016 | Egzemplifikacje modeli wsparcia edukacji włączającej na podstawie rozwiązań przyjętych w różnych krajach |
| Zilli, C. and Parsons, S. and Kovshoff, H. | 2020 | Keys to engagement: A case study exploring the participation of autistic pupils in educational decision-making at school |
| Znidar, Irena and Collin-Histed, Tanya and Niemeyer, Pascal and Parkkinen, Johanna and Lauridsen, Anne-Grethe and Zaria, Sandra and Cohen, Yossi and Manuel, Jeremy. | 2014 | The European Gaucher Alliance: a survey of member patient organisations' activities, healthcare environments and concerns |
| **Not empirical** | | |
| Alan, Paul Lee | 2018 | Scotland's Looked After Children: best educated in class, or do they need a ‘Hole in the Wall’? |
| Aldred, C. and Green, J. | 2019 | The preschool autism communication therapy: An evidence-based approach to enhancing early autistic development and empowering families |
| Alfred, L. | 2014 | Camphill's approach: relevant and effective for today's vulnerable learners |
| Allan, J. and Youdell, D. | 2017 | Ghostings, materialisations and flows in Britain's special educational needs and disability assemblage |
| Allan, Jacqueline | 2017 | Diabetes and eating disorders: Update to the NICE guideline |
| Anonymous | 2014 | CAMHS has 'serious and deeply ingrained problems' |
| Anonymous | 2014 | Advice and support on the Children and Families Act |
| Anonymous | 2014 | Helping parents to access support |
| Anonymous | 2015 | Children denied access to Portage services |
| Anonymous | 2016 | Children waiting for mental health support: A new review has revealed the extent to which young people face barriers in getting help |
| Anonymous | 2016 | Supporting young people with learning disabilities: bridging the gap |
| Anonymous | 2016 | Children in local authority care |
| Anonymous | 2018 | Corrigendum to: Trends in the provision of residential educational placements available for young people with learning disabilities/autism in England (Tizard Learning Disability Review, 22, 4, (222-229), 10.1108/TLDR-07-2017-0028) |
| Anonymous | 2020 | Girls with autism are 'dodging diagnosis' by camouflaging their behaviours |
| Anonymous | 2015 | Seeking the vote |
| Ansell, J. | 2013 | Sleep Scotland: Promoting healthy sleep in children and young people |
| Archard, P. J. and O'Reilly, M. and Fitzpatrick, S. and Fox, J. | 2021 | Youth telemental health and COVID-19...Power E, Hughes S, Cotter D, et al. Youth mental health in the time of COVID-19. Irish Journal of Psychological Medicine. 2020;37(4):301-305 |
| Avramides, K. and Bernardini, S. and Foster, M. E. and Frauenberger, C. and Kossyvaki, L. and Mademtzi, M. | 2012 | State-of-the-art in TEL to support social communication skill development in children with autism: A multi-disciplinary review |
| Bali, A. and Hargreaves, D. S. and Cowman, J. and Lakhanpaul, M. and Dunkley, C. and Power, M. and Cross, J. H. | 2016 | Integrated care for childhood epilepsy: ongoing challenges and lessons for other long-term conditions |
| Bartlett, A. and Hollins, S. | 2018 | Challenges and mental health needs of women in prison |
| Bauer, S. and Kindermann, S. S. and Moessner, M. | 2017 | [Prevention of eating disorder: a review] |
| Beaudry-Bellefeuille, I. and Pomoni, M. and Welch, A. and Moriy√≥n-Iglesias, T. and Su√°rez-Gonz√°lez, M. and Ramos-Polo, E. | 2021 | Multidisciplinary approach to assessment and intervention of feeding problems in children with autism spectrum disorders: a clinical perspective |
| Begon, R. and Billington, T. | 2019 | Between category and experience: constructing autism, constructing critical practice |
| Belgutay, J. | 2013 | Additional Support Needs-Students struggle to apply online |
| Bernard, S. H. and Tranah, T. and Nicholas, J. | 2013 | Interventions for young people with intellectual disabilities who commit arson |
| Bewley, S. and Clifford, D. and McCartney, M. and Byng, R. | 2019 | Gender incongruence in children, adolescents, and adults |
| Beynon, R. and Wafula, S. | 2012 | A bright start |
| Bhui, K. | 2013 | From the editor's desk |
| Blackburn, J. and Minogue, V. | 2014 | Developing an eating disorder pathway: A case study |
| Blair, Mitch and Michie, Colin | 2014 | Child health |
| Boettcher, K. | 2015 | Demonstrating effective support to parents with learning disabilities. Part 1 |
| Boettcher, K. | 2016 | Demonstrating effective support to parents with learning disabilities. Part 2 |
| Bosmans, G. and Verschueren, K. and Cuyvers, B. and Minnis, H. | 2020 | Current perspectives on the management of reactive attachment disorder in early education |
| Bressan, Rodrigo A. and Grohs, Geder E. M. and Matos, Gabriela and Shergill, Sukhi | 2018 | Hope or hype in the treatment of schizophrenia ‚Äì what's the role of the physician? |
| Brochard, Sylvain and Newman, Christopher J. | 2019 | The need for innovation in participation in childhood disability |
| Brooks, Val and Thistlethwaite, Jill | 2012 | Working and Learning across Professional Boundaries |
| Bryant-Waugh, R. and Loomes, R. and Munuve, A. and Rhind, C. | 2021 | Towards an evidence-based out-patient care pathway for children and young people with avoidant restrictive food intake disorder |
| Buckley, Carole and Kendall, Tim and Taylor, Clare and Baird, Gillian | 2014 | GPs can adapt their care processes for children with autism |
| Buie, E. | 2012 | Parent petition for qualified teachers makes progress |
| Buie, E. | 2013 | Aberdeenshire's ASN figures are out of kilter |
| Bunt, S. | 2014 | A framework for the analysis of the social processes in the adoption of disabled children |
| Caan, W. | 2017 | A global, sharing society: cross border exchange of ideas about mental health |
| Campion, J. and Bhugra, D. and Bailey, S. and Marmot, M. | 2013 | Inequality and mental disorders: opportunities for action |
| Carter, Bernie | 2020 | Communicating Pain: The Challenge of Pain Assessment in Children with Profound Cognitive Impairment |
| Castro, S. and Palikara, O. | 2016 | Mind the Gap: The New Special Educational Needs and Disability Legislation in England |
| Chiarella, D. | 2019 | Special educational needs and fieldwork |
| Clibbens, Nicola and Harrop, Deborah and Blackett, Sally | 2018 | Early discharge in acute mental health: A rapid literature review |
| Coghill, D. and Seth, S. | 2015 | Effective management of attention-deficit/hyperactivity disorder (ADHD) through structured re-assessment: The Dundee ADHD Clinical Care Pathway |
| Colver, A. | 2018 | Transition of young people with disability |
| Cooray, S. and Bhaumik, S. and Michael, D. and Torales, J. and Ng, R. and Ventriglio, A. | 2016 | World Psychiatric Association (WPA) report on mental health issues in people with intellectual disability Paper 2: Health promotion in people with intellectual disabilities |
| Craig, T. J. | 2019 | Social care: an essential aspect of mental health rehabilitation services |
| Crane, L. and Adu, F. and Arocas, F. and Carli, R. and Eccles, S. and Harris, S. and Jardine, J. and Phillips, C. and Piper, S. and Santi, L. and Sartin, M. and Shepherd, C. and Sternstein, K. and Taylor, G. and Wright, A. | 2021 | Vulnerable and Forgotten: The Impact of the COVID-19 Pandemic on Autism Special Schools in England |
| Critten, V. | 2016 | Expectations and realisations: the employment story of a young man with cerebral palsy |
| Cumella, S. and Lyons, M. | 2018 | Shared-life communities for people with a learning disability: A review of the evidence |
| Deighton, Desiree | 2018 | Parenting politics: The highs and lows of parent-nurse partnerships |
| Dick, T. | 2013 | Emergency social services: did somebody change our name? |
| Dillenburger, Karola and R√∂ttgers, Hanns-R√ºdiger and Dounavi, Katerina and Sparkman, Coleen and Keenan, Mickey and Thyer, Bruce and Nikopoulos, Christos | 2014 | Multidisciplinary Teamwork in Autism: Can One Size Fit All? |
| Done, E. J. and Andrews, M. J. and Evenden, C. | 2022 | (C)old beginnings and technologies of rectification in early years education: the implications for teachers and children with special educational needs |
| Doyle, M. and Jones, P. | 2013 | Hodges' Health Career Model and its role and potential application in forensic mental health nursing |
| Drake, R. E. and Bond, G. R. and Thornicroft, G. and Knapp, M. and Goldman, H. H. | 2012 | Mental Health Disability: An International Perspective |
| Duffy, Simon | 2017 | Now the good old days have gone it's time to get organised |
| Duffy, Simon John and Murray, Pippa | 2013 | Transition and integration: Changing our starting point |
| Edmond, Karen | 2016 | Improving Neurodevelopmental Care for Young Children in Primary Care Services |
| Edwards, J. | 2015 | There is a crisis in mental health support for children and young people |
| Edwards, jenny | 2015 | In the spotlight |
| England, E. and Mughal, F. | 2019 | Underprovision of mental health services for children and young people |
| Essex, J. and MacAskill, M. G. | 2020 | Modern foreign language education for learners with additional support needs in Scotland |
| Fawcett, B. | 2016 | Children and disability: Constructions, implications and change |
| Fellinger, J. and Holzinger, D. and Pollard, R. | 2012 | Mental health of deaf people |
| Fellows, Julie | 2012 | School nursing for autism specific needs: A positive contribution |
| Ferguson, L. | 2021 | Vulnerable children's right to education, school exclusion, and pandemic law-making |
| Fullwood, D. | 2015 | Understanding and managing the health needs of veterans |
| Glasper, A. | 2018 | Improving transition from child and adolescent mental health services |
| Glasper, Alan | 2012 | Chrysalis to butterfly: improving access to psychological therapies |
| Glasper, E. A. | 2014 | Helping children with disabilities receive optimum care |
| Gleeson, H. and Turner, G. | 2012 | Transition to adult services |
| Godson, Rosalind | 2014 | What does the new SEN code of practice mean for health visitors and school nurses? |
| Goodchild, S. | 2015 | Growing pains |
| Gralton, E. | 2014 | Foetal alcohol spectrum disorder (FASD) ‚Äì Its relevance to forensic adolescent services |
| Greenland, E. and Shield, B. and Ochmann, M. and Michael, M. and Fels, J. | 2019 | Towards accessible acoustic criteria for inclusion in mainstream classrooms |
| Groce, N. and Challenger, E. and Berman-Bieler, R. | 2014 | Malnutrition and disability: unexplored opportunities for collaboration |
| Gunn, K. C. M. and Delafield-Butt, J. T. | 2016 | Teaching Children With Autism Spectrum Disorder With Restricted Interests: A Review of Evidence for Best Practice |
| Hacker Hughes, J. and Abdul-Hamid, W. K. and Fossey, M. J. | 2015 | Flash to bang: psychological trauma, veterans and military families: can services cope? |
| Hackett, S. S. and Ashby, L. and Parker, K. and Goody, S. and Power, N. | 2017 | UK art therapy practice-based guidelines for children and adults with learning disabilities |
| Hafidh, R. and Sharif, M. S. and Al-Bayatti, A. H. and Alfakeeh, A. S. and Alassafi, M. O. and Alqarni, M. A. | 2020 | An effective knowledge-based modeling approach towards a "Smart-School Care Coordination system" for children and young people with special educational needs and disabilities |
| Harris, Helen | 2008 | Meeting the needs of disabled children and their families: Some messages from the literature |
| Hassiotis, A. and Strydom, A. and Crawford, M. and Hall, I. and Omar, R. and Vickerstaff, V. and Hunter, R. and Crabtree, J. and Cooper, V. and Biswas, A. and Howie, W. and King, M. | 2014 | Clinical and cost effectiveness of staff training in Positive Behaviour Support (PBS) for treating challenging behaviour in adults with intellectual disability: a cluster randomised controlled trial |
| Hayes, Catherine | 2012 | The therapeutic alliance in healthcare assistant practice |
| Hayes, M. J. | 2015 | ‚Ä¶ evaluation of the impacts of the Social Communication Emotional Regulation and Transactional Support (SCERTS¬Æ) Model on multidisciplinary collaboration |
| Hepburn, H. | 2014 | Additional Support Needs-When growing up means going round in circles |
| Hepburn, H. | 2014 | Additional Support Needs-ASN crisis looms as numbers double |
| Hinton, D. and Kirk, S. | 2015 | Teachers' perspectives of supporting pupils with long-term health conditions in mainstream schools: a narrative review of the literature |
| Hitchcock, Gill | 2015 | Help at hand |
| Hollis, C. | 2022 | Youth mental health: risks and opportunities in the digital world |
| Hope, Mark | 2012 | SEN reform: children with SLCN could lose out |
| Hope, Mark | 2014 | Uncertain times for children and young people with SEN |
| Horn, E. and Kang, J. | 2012 | Supporting young children with multiple disabilities: What do we know and what do we still need to learn? |
| Hornby, G. | 2015 | Inclusive special education: Development of a new theory for the education of children with special educational needs and disabilities |
| Horridge, K. A. | 2014 | Data matters |
| Howard, L. M. and Khalifeh, H. | 2020 | Perinatal mental health: a review of progress and challenges |
| Hudson, L. and Nicholls, D. and Katzman, D. and Kennedy, A. | 2012 | Eating disorder in children and adolescents - Risky business? |
| James, O. and Naughton, L. | 2014 | Modern motherhood |
| Jarrett, Simon | 2021 | At the front of the queue for once |
| Jones, I. and Naughton, L. | 2014 | More than just the 'baby blues |
| Kaehne, A. | 2013 | Partnerships in Local Government: The case of transition support services for young people with learning disabilities |
| Kewley, Vicky | 2015 | Special care dentistry and the role of the dental nurse |
| Lai, Meng-Chuan and Szatmari, Peter | 2019 | Resilience in autism: Research and practice prospects |
| Lamb, Brian | 2019 | Statutory assessment for special educational needs and the Warnock Report; the first 40 Years |
| Leonard, H. | 2020 | Children with complex health needs and personal health budgets |
| Lunt, Neil and Bainbridge, Laura and Rippon, Simon | 2021 | Strengths, assets and place ‚Äì The emergence of Local Area Coordination initiatives in England and Wales |
| Lynch, E. | 2015 | Helping vulnerable mothers |
| Maclachlan, M. and Khasnabis, C. and Mannan, H. | 2012 | Inclusive health |
| Maddern, K. | 2013 | A step change in SEN education |
| Mafuba, Kay | 2021 | Children with intellectual disabilities and/or complex needs |
| Meresman, S. and Drake, L. | 2016 | Are School Feeding Programs Prepared to Be Inclusive of Children with Disabilities? |
| Messent, Philip | 2019 | Test of time: 'Out of the mainstream’ helping the children of parents with a mental illness' |
| Mooney, H. | 2012 | Children with special educational needs: what's the agenda? |
| Motamedi, Maya | 2016 | 'Best-placed?' School nursing services' role in providing early mental health interventions |
| Mullin, C. and Angus, L. and Dunnett-revised, S. | 2013 | DF5534 Children and Young People with Additional Support Needs |
| National Children's Bureau | 2017 | Children with complex disabilities lost in fragmented care system |
| NHS Confederation | 2022 | Equitable care leads to improved health outcomes for people with learning disabilities |
| Northway, R. | 2018 | The right support for the best start |
| Oldknow, Helen and Cornish, Angela and Newman, David | 2012 | Communication and collaboration in person-centred care planning |
| Palmer, S. B. and Summers, J. A. | 2013 | Foundations for self-determination in early childhood: An inclusive model for children with disabilities |
| Parish, C. | 2014 | Care quality standard issued to improve autism services |
| Reeve, Malcolm | 2015 | Improving outcomes for children with SEND |
| Robinson, D. and Moore, N. and Hooley, T. | 2018 | A future for young people with special educational needs and disabilities (SEND): a critical examination of the impact of education, health and care plans in England |
| Roncaglia, I. | 2016 | A practitioner's perspective of multidisciplinary teams: analysis of potential barriers and key factors for success |
| Šaljić, Z. and Hebib, E. |  | THE FAMILY-SCHOOL PARTNERSHIP AS REGARDS PROVIDING STUDENTS WITH ADDITIONAL SUPPORT |
| Sayal, K. and Prasad, V. and Daley, D. and Ford, T. and Coghill, D. | 2018 | ADHD in children and young people: prevalence, care pathways, and service provision |
| Seith, E. | 2013 | Additional support needs-Working together in the wilderness |
| Shidhaye, R. and Lund, C. and Chisholm, D. | 2015 | Closing the treatment gap for mental, neurological and substance use disorders by strengthening existing health care platforms: Strategies for delivery and integration of evidence-based interventions |
| Solomon, Mike | 2019 | Becoming comfortable with chaos: making collaborative multi-agency working work |
| Stanley, Summer G. | 2012 | Children with Disabilities in Foster Care: The Role of the School Social Worker in the Context of Special Education |
| Taylor-Beirne, S. and Fear, N. T. | 2021 | UK military families with a dependent who has Special Education Needs and/or Disability (SEND): a forgotten sub-population? |
| Tryfona, C. and Oatley, G. and Calderon, A. and Thorne, S. and Antona, M. and Stephanidis, C. | 2016 | M-health solutions to support the national health service in the diagnosis and monitoring of autism spectrum disorders in young children |
| Webster, Rob and Bosanquet, Paula and Blatchford, Peter | 2020 | Preparing teaching assistants for including all learners |
| Wessely, S. | 2014 | The realities and needs of children living with ADHD |
| Wilby, N. and Chiu, B. | 2015 | Preventing paediatric continence services going down the pan |
| Williams, A. and Lewis, D. A. | 2015 | Models of transition of care for adolescents who require Special Care Dentistry |
| Williams, Lisa | 2014 | Mental health, resilience and partnership commissioning |
| Williams, R. | 2016 | Handover standards |
| Wilson, A. and Tuffrey, A. and McKenzie, C. and Street, C. | 2015 | After the flood: young people's perspectives on transition |
| Wilson, Rhonda and Armstrong, Marie | 2016 | International networks: using conferences and site visits to improve care of young people |
| Wright, Barry and Walker, Rob and Holwell, Andy and Gentili, Nicoletta and Barker, Mandy and Rhys-Jones, Sara and Leach, Valerie and Hindley, Peter and Gascon-Ramos, Maria and Moore, Kate | 2012 | A New Dedicated Mental Health Service for Deaf Children and Adolescents |
| Yeşilkaya, E. | 2021 | Using the Medical Research Council framework for developing a logic model to support children with visual impairments in their learning environments |
| Zarotti, N. and Dale, M. and Eccles, F. J. R. and Simpson, J. | 2022 | More than Just a Brain Disorder: A Five-Point Manifesto for Psychological Care for People with Huntington‚Äôs Disease |
| **Wrong Publication Type** | | |
| Amani, Sarah | 2012 | Mary Seacole Award: Improving the health and wellbeing of the Nepalese community in Hampshire: The Journal of the Health Visitors' Association |
| Anonymous | 2012 | Research Roundup |
| Anonymous | 2013 | Safeguarding: case studies. making it fast and to the point |
| Anonymous | 2020 | SLIPPING THROUGH THE NET |
| Anonymous | 2016 | Lack of CAMHS services capacity is 'biggest barrier to tackling mental health' in young people |
| Anonymous | 2017 | Scotland's children and young people |
| Anonymous | 2019 | HRH The Prince of Wales Award for Integrated Approaches to Care |
| Azzopardi-Lane, Claire | 2017 | Intimate relationships and persons with learning disability |
| Baker, John and Sanderson, Ana and Challen, Katharine and Price, Owen | 2014 | Acute inpatient care in the UK. Part 1: recovery-oriented wards |
| Balthazar, Catherine H. and Ebbels, Susan and Zwitserlood, Rob | 2020 | Explicit Grammatical Intervention for Developmental Language Disorder: Three Approaches |
| Baos, S. and Brigden, A. and Anderson, E. and Hollingworth, W. and Price, S. and Mills, N. and Beasant, L. and Gaunt, D. and Garfield, K. and Metcalfe, C. and Parslow, R. and Downing, H. and Kessler, D. and Macleod, J. and Stallard, P. and Knoop, H. and Van de Putte, E. and Nijhof, S. and Bleijenberg, G. and Crawley, E. | 2018 | Investigating the effectiveness and cost-effectiveness of FITNET-NHS (Fatigue In Teenagers on the interNET in the NHS) compared to Activity Management to treat paediatric chronic fatigue syndrome (CFS)/myalgic encephalomyelitis (ME): protocol for a randomised controlled trial |
| Belgutay, J. | 2012 | Need additional support for learning? Put your hands up |
| Bennett, Kathryn J. PhD and Gorman, Daniel A. M. D. and Duda, Stephanie J. MSc and Brouwers, Melissa PhD and Szatmari, Peter M. D. | 2016 | 4.30 PRACTICE GUIDELINE QUALITY IN CHILD AND YOUTH MENTAL HEALTH: DO GUIDELINE DEVELOPMENT METHODS ALIGN WITH INTERNATIONAL QUALITY STANDARDS? |
| Bharat, R. and Uzaina, U. and Yadav, T. and Niranjan, S. and Kurade, P. | 2022 | mHealth apps delivering early intervention to support parents of children with autism: A scoping review protocol |
| Birchwood, M. and Singh, S. P. | 2013 | Mental health services for young people: matching the service to the need |
| Bjornstad, G. and Wilkinson, K. and Cuffe-Fuller, B. and Fitzpatrick, K. and Borek, A. and Ukoumunne, O. C. and Hawton, A. and Tarrant, M. and Berry, V. and Lloyd, J. and McDonald, A. and Fredlund, M. and Rhodes, S. and Logan, S. and Morris, C. | 2019 | Healthy Parent Carers peer-led group-based health promotion intervention for parent carers of disabled children: Protocol for a feasibility study using a parallel group randomised controlled trial design |
| Blakemore, S. | 2013 | Co-ordination glitches affect care of life-limited children |
| Brown, A. | 2012 | Preventing drug and alcohol use by school children |
| Brown, A. and McClelland, J. and Boysen, E. and Mountford, V. and Glennon, D. and Schmidt, U. | 2018 | The FREED Project (first episode and rapid early intervention in eating disorders): service model, feasibility and acceptability |
| Buie, E. | 2012 | Special needs sector struggles with recruitment |
| C, Edwards and E, Lyle | 2017 | Getting over the bump: a collaborative project between maternal medicine midwives and occupational therapy, enabling increased independence in childcare roles for expectant mothers with physical and/or sensory impairments...RCOT (Royal College of Occupational Therapist) Annual Conference 2017 |
| Cantali, D. | 2017 | Primary to secondary school transitions for children with additional support needs: what the literature is telling us |
| Cantan, Caroline and Bolger, Barbara | 2017 | National policy on access to services for children with disability or developmental delay: Working together to support children and families |
| Carroll, Clare and Sixsmith, Jane | 2017 | A Conceptual Model to Support Integrated Early Intervention Practice for Children with Disabilities |
| Childs-Fegredo, J. and Burn, A. M. and Duschinsky, R. and Humphrey, A. and Ford, T. and Jones, P. B. and Howarth, E. | 2021 | Acceptability and Feasibility of Early Identification of Mental Health Difficulties in Primary Schools: A Qualitative Exploration of UK School Staff and Parents’ Perceptions |
| Coe, C. and Barlow, J. | 2013 | Supporting women with perinatal mental health problems: the role of the voluntary sector |
| Colver, A. F. and Merrick, H. and Deverill, M. and Le Couteur, A. and Parr, J. and Pearce, M. S. and Rapley, T. and Vale, L. and Watson, R. and McConachie, H. and Transition Collaborative, Group | 2013 | Study protocol: longitudinal study of the transition of young people with complex health needs from child to adult health services |
| Cooper, M. and Duncan, B. and Golden, S. and Toth, K. | 2021 | Systematic client feedback in therapy for children with psychological difficulties: pilot cluster randomised controlled trial |
| Crane, Laura and Davies, Jade and Fritz, Anne and Portman, Kerrie and O'Brien, Sarah and Worsley, Alison and Remington, Anna | 2021 | I can't say that anything has changed: Parents of autistic young people (16-25 years) discuss the impact of the Children and Families Act in England and Wales |
| Davie, E. | 2014 | Network |
| Department for Education |  | EHCP Journeys: Education HEalth & Care Plans for children |
| Dixon, J. |  | Final Report Innovation Grant, Forest Skills, Inclusion and Wellbeing Service |
| Dwyer, Gillian O. | 2017 | AIMPaediatric Spasticity and Orthopaedic Management for Children with Physical and Neuro-disability |
| Edbrooke-childs, Julian and Wolpert, Miranda and Deighton, Jessica | 2016 | Introduction to the Special Section on Implementing Feedback from Outcome Measures in Child and Adult Mental Health Services |
| Fitzpatrick, Joanne | 2012 | QNI Opening Doors Project -- improving health for homeless people and families |
| Ford, T. and Edwards, V. and Sharkey, S. and Ukoumunne, O. C. and Byford, S. and Norwich, B. and Logan, S. | 2012 | Supporting teachers and children in schools: the effectiveness and cost-effectiveness of the Incredible Years teacher classroom management programme in primary school children: a cluster randomised controlled trial, with parallel economic and process evaluations |
| Frith, Emily | 2016 | Missing out |
| Godson, Rosalind | 2014 | School Nurse 121 Campaign |
| Grant-Peterkin, H. and Schleicher, T. and Fazel, M. and Majid, S. and Robjant, K. and Smith, G. and Katona, C. | 2014 | Inadequate mental healthcare in immigration removal centres |
| Grant, A. and Rix, A. and Winter, P. and Mattick, K. and Jones, D. | 2015 | Support for medical students with mental health problems: a conceptual model |
| Griffiths, T. and Addison, A. | 2017 | Access to communication technology for children with cerebral palsy |
| Hawtin, Gemma | 2021 | Making stuff better to provide the best care possible |
| Hayes, L. and Timmermans, H. | 2016 | Sound, electronics and music: An evaluation of early embodied education |
| Henshaw, Pete | 2012 | Nine in ten deaf-blind children do not receive the professional support they need |
| Jaques, Helen | 2014 | Premature death in people with learning disabilities |
| Kennedy, R. and Binns, F. | 2014 | Communicating and managing children and young people with autism and extensive burn injury |
| Krause, Nihara | 2020 | Current context of children and young people's mental health services |
| Kuhn, K. and Albertowski, K. | 2021 | Of the necessary interplay of therapy and pedagogy in psychiatric hospitals for children with intellectual disability |
| Lawlor, Anne and Kerin, Lorna and Orr, David and Leahy, Ronan and Crotty, Fiona and Kelleher, Suzanne and Lynch, Sally Ann and Duggan, Laura and Molloy, Eleanor and Altman, Edel and O'Dwyer, Aisling and Cotter, Christina and Ward, Alana and McNicholas, Fiona | 2017 | Developing integrated care in the context of rare chromosomal conditions: 22q11 Deletion Syndrome; A parent/clinician collaboration |
| Leigh, E. and Creswell, C. and Stallard, P. and Waite, P. and Violato, M. and Pearcey, S. and Brooks, E. and Taylor, L. and Warnock-Parkes, E. and Clark, D. M. | 2021 | Delivering cognitive therapy for adolescent social anxiety disorder in NHS CAMHS: A clinical and cost analysis |
| Mall, Madan and King-Hill, Sophie and Holland, Paul | 2013 | Managing risk-taking behaviour in children and young people with ADHD |
| Martin, N. and Milton, D. E. M. and Krupa, J. and Brett, S. and Bulman, K. and Callow, D. and Copeland, F. and Cunningham, L. and Ellis, W. and Harvey, T. and Moranska, M. and Roach, R. and Wilmot, S. | 2019 | The sensory school: working with teachers, parents and pupils to create good sensory conditions |
| Mayor, S. | 2013 | Service design. Putting research solutions to the test |
| McCardle, L. | 2014 | Pathfinders to lead efforts to meet September SEN reforms deadline |
| McDevitt, Sara and Jennings, Rhona and Wrigley, Margo | 2017 | Development of an Integrated National Model of Care for Eating Disorder Services across Multiple Settings |
| McDevitt, Sara and McNicholas, Fiona and Whyte, Aileen and Jennings, Rhona | 2017 | Interprofessional education as a building block for collaborative and integrated eating disorder services |
| Mengoni, S. E. and Oates, J. | 2014 | A tool to record and support the early development of children including those with special educational needs or disabilities |
| Miller, H. and Juniper, T. and Reid, P. and Lloyd, C. and Goodson, A. | 2015 | G463 (P) Determining the health needs of children with special educational needs |
| Mitton, Catherine and McLoughlin, Helen and Mellor, Christine and Topping, Chris | 2012 | Improving the health of children with autistic spectrum disorder |
| Mooney, H. | 2012 | Children with special educational needs: what's the agenda? The English government's announcement in October that it would extend the special educational needs |
| Moss, Aidan and Miller, Robin | 2019 | Models of community based integrated care for people with a learning disability and/or autism: evaluation findings from a national implementation programme |
| Neale, A. and Kinnair, D. | 2017 | Early intervention in psychosis services |
| Pierags, D. | 2016 | A social communication, emotional regulation, transactional support framework for ASD |
| Pletser, Jayne | 2018 | Achievement for All in International Classrooms: Improving Outcomes for Children and Young People with Special Educational Needs and Disabilities |
| Schofield, J. | 2020 | The implementation of physiotherapy programmes in a secondary special school-a service evaluation |
| Wallace-Thompson, L. and Rose, J. | 2021 | Improving support for children with autism and their families using a 100 day challenge framework |
| Watson, B. | 2015 | Finding logical interventions |
| **Age group: 0-25 not separated** | | |
| Aimola, L. and Jasim, S. and Tripathi, N. and Bassett, P. and Quirk, A. and Worrall, A. and Tucker, S. and Holder, S. and Crawford, M. J. | 2018 | Impact of a peer-review network on the quality of inpatient low secure mental health services: cluster randomised control trial |
| Alderdice, F. and McNeill, J. and Lynn, F. | 2013 | A systematic review of systematic reviews of interventions to improve maternal mental health and well-being |
| Anslow, Katherine | 2014 | Systemic family therapy using the reflecting team: the experiences of adults with learning disabilities |
| Araten-Bergman, Tal and Shpigelman, Carmit-Noa | 2021 | Staying connected during COVID-19: family engagement with adults with developmental disabilities in supported accommodation |
| Ashworth, Sarah and Jansen, Krista and Bullock, Lydia and Mooney, Paul | 2017 | Mind Matters: a psychoeducation programme for individuals with intellectual disabilities and co-morbid diagnoses of mental disorder |
| Babb, C. and Brede, J. and Jones, C. R. G. and Elliott, M. and Zanker, C. and Tchanturia, K. and Serpell, L. and Mandy, W. and Fox, J. R. E. | 2021 | 'It's not that they don't want to access the support . . . it's the impact of the autism': The experience of eating disorder services from the perspective of autistic women, parents and healthcare professionals |
| Bainbridge, L. and Lunt, N. | 2021 | Place, Strengths and Assets: A Case Study of How Local Area Coordination is Supporting Individuals and Families under Conditions of Austerity |
| Bamford, Karen and Benton, Carl | 2015 | Gathering meaningful service user feedback regarding a community forensic service |
| Ban, S. and Baker, K. and Bradley, G. and Derbyshire, J. and Elliott, C. and Haskin, M. and MacKnight, J. and Rosengarten, L. | 2021 | Hello, my name is ...': an exploratory case study of inter-professional student experiences in practice |
| Barnett, P. and Steare, T. and Dedat, Z. and Pilling, S. and McCrone, P. and Knapp, M. and Cooke, E. and Lamirel, D. and Dawson, S. and Goldblatt, P. and Hatch, S. and Henderson, C. and Jenkins, R. and K, T. and Machin, K. and Simpson, A. and Shah, P. and Stevens, M. and Webber, M. and Johnson, S. and Lloyd-Evans, B. | 2022 | Interventions to improve social circumstances of people with mental health conditions: a rapid evidence synthesis |
| Barr, K. and Ormrod, J. and Dudley, R. | 2015 | An exploration of what service users value about early intervention in psychosis services |
| Barrett, B. and Waheed, W. and Farrelly, S. and Birchwood, M. and Dunn, G. and Flach, C. and Henderson, C. and Leese, M. and Lester, H. and Marshall, M. and Rose, D. and Sutherby, K. and Szmukler, G. and Thornicroft, G. and Byford, S. | 2013 | Randomised controlled trial of joint crisis plans to reduce compulsory treatment for people with psychosis: economic outcomes |
| Batchelor, R. and Gulshan, S. and Shritharan, H. and Williams, E. and Henderson, C. and Gillard, S. and Woodham, L. A. and Cornelius, V. and Elkes, J. and Sin, J. | 2022 | Perceived Acceptability and Experiences of a Digital Psychoeducation and Peer Support Intervention (COPe-support): Interview Study With Carers Supporting Individuals With Psychosis |
| Beake, Sarah and Clark, Louise L. and Turner, Toni and Bick, Debra | 2013 | A mixed methods study to develop and pilot a competency assessment tool to support midwifery care of women with intellectual disabilities |
| Bell, Richard | 2014 | A multi-agency evaluation of the Leeds Dual Diagnosis care co-ordination protocol |
| Bennett, A. M. D. and Yeo, J. C. L. and Rao, A. M. | 2015 | The effectiveness of a questionnaire in the triage and diagnosis of balance disorders |
| Berent, P. A. and Fujiyama, T. and Yoshida, N. | 2021 | Evaluating delivery of cycling activity and training programmes for disabled people in the UK |
| Berzins, Kathryn and Baker, John and Brown, Mark and Lawton, Rebecca | 2018 | A cross-sectional survey of mental health service users, carers‚ and professionals: priorities for patient safety in the United Kingdom |
| Bowring, Darren L. and et, al | 2020 | Outcomes from a community-based Positive Behavioural Support team for children and adults with developmental disabilities |
| Brown, Michael and Chouliara, ZoÃ« and MacArthur, Juliet and McKechanie, Andrew and Mack, Siobhan and Hayes, Matt and Fletcher, Joan | 2016 | The perspectives of stakeholders of intellectual disability liaison nurses: a model of compassionate, person-centred care |
| Brugha, T. S. and Taub, N. and Smith, J. and Morgan, Z. and Hill, T. and Meltzer, H. and Wright, C. and Burns, T. and Priebe, S. and Evans, J. and Fryers, T. | 2012 | Predicting outcome of assertive outreach across England |
| Buckingham, S. A. and Sein, K. and Anil, K. and Demain, S. and Gunn, H. and Jones, R. B. and Kent, B. and Logan, A. and Marsden, J. and Playford, E. D. and Freeman, J. | 2022 | Telerehabilitation for physical disabilities and movement impairment: A service evaluation in South West England |
| Bundock, K. E. and Hewitt, O. | 2017 | A review of social skills interventions for adults with autism and intellectual disability |
| Burns, T. and Rugkasa, J. and Molodynski, A. and Dawson, J. and Yeeles, K. and Vazquez-Montes, M. and Voysey, M. and Sinclair, J. and Priebe, S. | 2013 | Community treatment orders for patients with psychosis (OCTET): a randomised controlled trial |
| Callaghan, P. and Phillips, P. and Khalil, E. and Carter, T. | 2012 | Meeting the physical health-care needs of people with substance misuse problems: evaluation of a nurse-led blood-borne virus programme |
| Cameron, J. and Hart, A. and Brooker, S. and Neale, P. and Reardon, M. | 2018 | Collaboration in the design and delivery of a mental health Recovery College course: experiences of students and tutors |
| Campion, J. and Taylor, M. J. and McDaid, D. and Park, A. L. and Shiers, D. | 2019 | Applying economic models to estimate local economic benefits of improved coverage of early intervention for psychosis |
| Cassinello, Keeley and Bramley, Sally | 2012 | Keeley's journey: From service user to service provider |
| Castles, Amy and Anne Bailey, Carol and Gates, Bob and Sooben, Roja | 2012 | Role of liaison nurses in improving communication |
| Castles, Amy and Bailey, Carol and Gates, Bob and Sooben, Roja | 2014 | Experiences of the implementation of a learning disability nursing liaison service within an acute hospital setting: a service evaluation |
| Chauhan, N. and Leeming, D. and Wattis, J. | 2022 | "It's a Big Family Here." Becoming and Belonging in a Service Providing Employment-Related Support for People with Mental Health Problems: An Interpretative Phenomenological Analysis |
| Chiesa, Marco and Cirasola, Antonella and Fonagy, Peter | 2017 | Four years comparative follow-up evaluation of community-based, step-down, and residential specialist psychodynamic programmes for personality disorders |
| Chilton, J. and Crone, D. and Tyson, P. J. | 2018 | Clinical Outcomes From a 10-Week Follow-Up Psychoeducational Program for Dual Diagnosis |
| Chinn, Deborah | 2022 | 'I Have to Explain to him': How Companions Broker Mutual Understanding Between Patients with Intellectual Disabilities and Health Care Practitioners in Primary Care |
| Clare, I. C. H. and Wade, K. A. and Ranke, N. and Whitson, S. and Lillywhite, A. and Jones, E. and Broughton, S. and Wagner, A. and Holland, A. J. | 2019 | Specialist community teams for adults with learning disabilities: referrals to a countywide service in England |
| Clibbens, N. and Berzins, K. and Baker, J. | 2019 | Caregivers' experiences of service transitions in adult mental health: An integrative qualitative synthesis |
| Codling, M. | 2013 | 'Eye Know': Translating needs from annual health checks for people with learning disabilities to demand |
| Coleman, Anna and Glendinning, Caroline | 2015 | Going round in circles? Joint working between primary health and social care: Managing Community Care |
| Coleman, S. E. and Sharrock, E. | 2022 | An exploration of the Personal Relationship Advisory Group in a community learning disability service: A service development project |
| Cox, A. and Parsons, T. and Watkin, S. and Gallagher, A. | 2021 | Supporting the delivery of good maternity care for parents with learning disabilities |
| Curtis, S. and Gesler, W. and Wood, V. and Spencer, I. and Mason, J. and Close, H. and Reilly, J. | 2013 | Compassionate containment? Balancing technical safety and therapy in the design of psychiatric wards |
| Dalton, Catherine and Farrell, Rachel and De Souza, Annette and Wujanto, Evelyn and McKenna-Slade, Ann and Thompson, Sharmen and Liu, Clarence and Greenwood, Richard | 2012 | Patient inclusion in goal setting during early inpatient rehabilitation after acquired brain injury |
| Davys, Deborah and Mitchell, Duncan and Haigh, Carol | 2016 | Adult Siblings Consider the Future: Emergent Themes |
| Dodgson, G. and Ross, L. and Tiffin, P. and Mitford, E. and Brabban, A. | 2012 | Outcomes post-discharge from an early intervention in psychosis service |
| Doherty, A. J. and Jones, S. P. and Chauhan, U. and Gibson, J. M. E. and Doherty, A. J. and Jones, S. P. | 2020 | Eating well, living well and weight management: A co-produced semi-qualitative study of barriers and facilitators experienced by adults with intellectual disabilities |
| Dolan, Rachel and Shaw, Jenny and Hann, Mark | 2019 | Pregnancy in prison, Mother and Baby Unit admission and impacts on perinatal depression and 'quality of life' |
| Dolman, C. and Jones, I. and Howard, L. M. | 2013 | Pre-conception to parenting: a systematic review and meta-synthesis of the qualitative literature on motherhood for women with severe mental illness |
| Doody, O. and Slevin, E. and Taggart, L. | 2019 | A survey of nursing and multidisciplinary team members' perspectives on the perceived contribution of intellectual disability clinical nurse specialists |
| Doody, Owen | 2016 | VIP care in learning disability nursing |
| Doyle, M. and Logan, C. and Ludlow, A. and Holloway, J. | 2012 | Milestones to recovery: preliminary validation of a framework to promote recovery and map progress through the medium secure inpatient pathway |
| Dunn, Abby and Startup, Helen and Sam, Cartwright‚ÄêHatton | 2022 | Adult mental health service engagement with patients who are parents: Evidence from 15 English mental health trusts |
| Dunn, T. J. and Browne, A. and Haworth, S. and Wurie, F. and Campos-Matos, I. | 2021 | Service Evaluation of the English Refugee Health Information System: Considerations and Recommendations for Effective Resettlement |
| Durrant, A. | 2020 | Factors influencing the quality of care learning disabled patients receive in hospital |
| Edge, D. and Grey, P. | 2018 | An Assets-Based Approach to Co-Producing a Culturally Adapted Family Intervention (CaFI) with African Caribbeans Diagnosed with Schizophrenia and Their Families |
| Felce, D. and Perry, J. | 2012 | Diagnostic grouping among adults with intellectual disabilities and autistic spectrum disorders in staffed housing |
| Fish, R. and Morgan, H. | 2021 | ‘Them two are around when I need their help’: The importance of good relationships in supporting people with learning disabilities to be ‘a good space’ |
| Fuchs, K. and Ravoux, P. | 2019 | Transforming care: developing a community enhanced intervention service |
| Graham, S. and Sullivan, K. and Briggs, L. and Goodall, M. and Iraci Capucinello, R. | 2019 | A preliminary service evaluation of a personality disorder case management service |
| Greenwood, Paul Jon and Shiers, David Edward | 2016 | Don’t just screen intervene; a quality improvement initiative to improve physical health screening of young people experiencing severe mental illness |
| Hadden, J. M. and Thomas, S. and Jellicoe-Jones, L. and Marsh, Z. | 2016 | An exploration of staff and prisoner experiences of a newly commissioned personality disorder service within a category B male establishment |
| Hall, K. and Grundy, S. | 2014 | An analysis of Time 4U, a therapeutic group for women with postnatal depression |
| Hamilton-West, K. and Hotham, S. and Yang, W. and Hedayioglu, J. and Brigden, C. | 2017 | Evaluation of a pilot service to facilitate discharge of patients with stable long-term mental health needs from secondary to primary care: the role of Primary Care Mental Health Specialists |
| Hardy, S. and Gray, R. | 2012 | Is the use of an invitation letter effective in prompting patients with severe mental illness to attend a primary care physical health check? |
| Harrison, M. R. and McMillan, C. F. and Dickinson, T. | 2012 | Service innovation: a comparison of two approaches for physical screening of psychiatric inpatients |
| Hassiotis, A. and Poppe, M. and Strydom, A. and Vickerstaff, V. and Hall, I. and Crabtree, J. and Omar, R. and King, M. and Hunter, R. and Bosco, A. and Biswas, A. and Ratti, V. and Blickwedel, J. and Cooper, V. and Howie, W. and Crawford, M. | 2018 | Positive behaviour support training for staff for treating challenging behaviour in people with intellectual disabilities: a cluster RCT |
| Hassiotis, Angela and Poppe, Michaela and Strydom, Andre and Vickerstaff, Victoria and Hall, Ian S. and Crabtree, Jason and Omar, Rumana Z. and King, Michael and Hunter, Rachael and Biswas, Asit and Cooper, Viv and Howie, William and Crawford, Michael J. | 2018 | Clinical outcomes of staff training in positive behaviour support to reduce challenging behaviour in adults with intellectual disability: cluster randomised controlled trial |
| Hatchett, Richard and McLaren, Susan and Corrigan, Philomena and Filer, Lynda | 2015 | An evaluation of a specialist nursing service for adult patients with congenital heart disease |
| Hatton, V. A. and Lee, M. X. | 2021 | An evaluation of the online post-diagnostic groups facilitated by the autism spectrum condition service at Gloucestershire Health and Care NHS |
| Heppell, S. and Rose, J. | 2021 | Men with intellectual disabilities and sexual offending histories: an exploration of their experiences of living within a secure hospital setting |
| Heron, J. and Gilbert, N. and Dolman, C. and Shah, S. and Beare, I. and Dearden, S. and Muckelroy, N. and Jones, I. and Ives, J. | 2012 | Information and support needs during recovery from postpartum psychosis |
| Heslop, P. and Marriott, A. | 2015 | Making a difference - the impact of the Confidential Inquiry into premature deaths of people with learning disabilities |
| Hodge, Suzanne and Barr, Wally and Bowen, Louise and Leeven, Martina and Knox, Paul | 2013 | Exploring the role of an emotional support and counselling service for people with visual impairments |
| Hodgins, F. and Mulhern, S. and Abrahams, S. | 2020 | The clinical impact of the Edinburgh Cognitive and Behavioural ALS Screen (ECAS) and neuropsychological intervention in routine ALS care |
| Hollinghurst, S. and Carroll, F. E. and Abel, A. and Campbell, J. and Garland, A. and Jerrom, B. and Kessler, D. and Kuyken, W. and Morrison, J. and Ridgway, N. and Thomas, L. and Turner, K. and Williams, C. and Peters, T. J. and Lewis, G. and Wiles, N. | 2014 | Cost-effectiveness of cognitive-behavioural therapy as an adjunct to pharmacotherapy for treatment-resistant depression in primary care: economic evaluation of the CoBalT Trial |
| Holt, R. R. and Tearle, S. | 2018 | A community EQUIP treatment group |
| Javaid, A. and Hussain, M. and Michael, D. and Dasari, S. and Bailey, T. | 2020 | Stopping overmedication to manage challenging behaviour in LD - STOMP disability ‚Äì STOMP (pilot study) |
| Johnson, Chris F. and Liddell, Karen and Guerri, Claudio and Findlay, Paul and Thom, Alex | 2020 | Medicines reconciliation at the community mental health team general practice interface: quality improvement study |
| Kaehne, Axel | 2016 | Project SEARCH UK: evaluating its employment outcomes |
| Keown, P. and French, J. and Gibson, G. and Newton, E. and Cull, S. and Brown, P. and Parry, J. and Lyons, D. and McKinnon, I. | 2016 | Too much detention? Street Triage and detentions under Section 136 Mental Health Act in the North-East of England: a descriptive study of the effects of a Street Triage intervention |
| Kerfoot, Gemma and Bamford, Zandra and Jones, Sarah Amelia | 2012 | Evaluation of psychological provision into an acute inpatient unit |
| Laurance, J. and Henderson, S. and Howitt, P. J. and Matar, M. and Al Kuwari, H. and Edgman-Levitan, S. and Darzi, A. | 2014 | Patient engagement: four case studies that highlight the potential for improved health outcomes and reduced costs |
| Lewis, Nicola and Lewis, Karin and Davies, Bronwen | 2016 | 'I don't feel trapped anymore...I feel like a bird': People with Learning Disabilities' Experience of Psychological Therapy |
| McGilloway, Connie and Smith, David and Galvin, Rose | 2020 | Barriers faced by adults with intellectual disabilities who experience sexual assault: A systematic review and meta-synthesis |
| Mellor, C. and Blackman, J. and Barker, E. and Bhula, Z. and Sibanda, E. and Rawlings, E. and Harrington, D. and Combe, G. | 2020 | Wellbeing Wednesdays: nurse-led clinic for improving physical health care in a general adolescent inpatient unit |
| Menear, Matthew and et, al | 2020 | Strategies for engaging patients and families in collaborative care programs for depression and anxiety disorders: a systematic review |
| Meyer, Carly and Hickson, Louise | 2021 | Can eHealth Meet Needs of the Hearing Impaired? |
| Perez, J. and Jin, H. and Russo, D. A. and Stochl, J. and Painter, M. and Shelley, G. and Jackson, E. and Crane, C. and Graffy, J. P. and Croudace, T. J. and Byford, S. and Jones, P. B. | 2015 | Clinical effectiveness and cost-effectiveness of tailored intensive liaison between primary and secondary care to identify individuals at risk of a first psychotic illness (the LEGs study): a cluster-randomised controlled trial |
| Randall-James, J. and Coles, S. | 2018 | Questioning diagnoses in clinical practice: a thematic analysis of clinical psychologists' accounts of working beyond diagnosis in the United Kingdom |
| Stevens, M. and Harris, J. | 2017 | Social work support for employment of people with learning disabilities: Findings from the English Jobs First demonstration sites |
| Stroud, J. and Banks, L. and Doughty, K. | 2015 | Community treatment orders: learning from experiences of service users, practitioners and nearest relatives |
| Tarleton, B. and Turney, D. | 2020 | Understanding ‘Successful Practice’ with Parents with Learning Difficulties when there are Concerns about Child Neglect: the Contribution of Social Practice Theory |
| Wilson, C. and King, M. and Russell, J. | 2019 | A mixed-methods evaluation of a Recovery College in South East Essex for people with mental health difficulties |
| Wistow, G. and Perkins, M. and Knapp, M. and Bauer, A. and Bonin, E. M. | 2016 | Circles of Support and personalization: Exploring the economic case |
| Zala, D. and Brabban, A. and Stirzaker, A. and Kartha, M. R. and McCrone, P. | 2019 | The Cost-Effectiveness of the Improving Access to Psychological Therapies (IAPT) Programme in Severe Mental Illness: A Decision Analytical Model Using Routine Data |
| **Age group: not 0-25** | | |
| Bartle, J. and Crossland, T. and Hewitt, O. | 2016 | ‘Planning Live’: using a person-centred intervention to reduce admissions to and length of stay in learning disability inpatient facilities |
| Bayley, Amanda and Amoako, Annika and El-Tahir, Mohamed Omer | 2017 | Service evaluation of a Specialist Memory Clinic for adults with ID in South Wales |
| Besenius, C. and Beirne, K. and Grogan, S. and Clark-Carter, D. | 2013 | Cognitive behavioral therapy (CBT) in a depression/alcohol use disorder group: A qualitative study |
| Birdsey, N. | 2021 | CBT for Anxiety Related to Parenting a Child with a Life-Limiting Neuromuscular Condition: A Single Case Study |
| Enoch, J. and Dickinson, C. and Subramanian, A. | 2021 | What support do caregivers of people with visual impairment receive and require? An exploratory study of UK healthcare and charity professionals’ perspectives |
| Hassan, S. and Heinkel, S. and Burton, A. and Blackburn, R. and McCloud, T. and Ross, J. and Osborn, D. and Walters, K. | 2020 | A qualitative study exploring the barriers and facilitators of implementing a cardiovascular disease risk reducing intervention for people with severe mental illness into primary care contexts across England: the 'PRIMROSE' trial |
| Lawrence, J. | 2017 | Researching unheard voices: Parents caring for their adult children who have learning disabilities |
| **Intervention/exposure: not health/social care/education** | | |
| Alessandrini, A. and Cappelletti, A. and Zancanaro, M. | 2014 | Audio-augmented paper for therapy and educational intervention for children with autistic spectrum disorder |
| Aujla, I. J. | 2020 | ‘It’s my dream come true’: experiences and outcomes of an inclusive dance talent development programme |
| Barnes, J. | 2014 | Drama to promote social and personal well-being in six- and seven-year-olds with communication difficulties: The Speech Bubbles project |
| Botting, N. and Gaynor, M. and Tucker, K. and Orchard-Lisle, G. | 2016 | The importance of natural change in planning school-based intervention for children with Developmental Language Impairment (DLI) |
| Brelsford, V. L. and Dimolareva, M. and Rowan, E. and Gee, N. R. and Meints, K. | 2022 | Can dog-assisted and relaxation interventions boost spatial ability in children with and without special educational needs? A longitudinal, randomized controlled trial |
| Broomhead, K. E. | 2013 | ‘You cannot learn this from a book'; pre-service teachers developing empathy towards parents of children with Special Educational Needs (SEN) via parent stories |
| Buckland, Rosie and Desmier, Michelle | 2017 | Small STEPPS: the provision of, and changes to, an emotional regulation group for women in a community mental health setting in the UK |
| Cruice, M. and Woolf, C. and Caute, A. and Monnelly, K. and Wilson, S. and Marshall, J. | 2021 | Preliminary outcomes from a pilot study of personalised online supported conversation for participation intervention for people with Aphasia |
| Demery, R. and Thirlaway, K. and Mercer, J. | 2012 | The experiences of university students with a mood disorder |
| Dillenburger, K. and Coyle, C. | 2019 | Education for all: The Good Inclusion Game |
| Dimmick, D. | 2022 | Evaluation of teaching games to understand how to improve the motivation levels of children with special needs |
| Ebert, D. D. and Mortier, P. and Kaehlke, F. and Bruffaerts, R. and Baumeister, H. and Auerbach, R. P. and Alonso, J. and Vilagut, G. and Martinez, K. I. and Lochner, C. and Cuijpers, P. and Kuechler, A. M. and Green, J. and Hasking, P. and Lapsley, C. and Sampson, N. A. and Kessler, R. C. and collaborators, W. H. O. World Mental Health-International College Student Initiative | 2019 | Barriers of mental health treatment utilization among first-year college students: First cross-national results from the WHO World Mental Health International College Student Initiative |
| Ezzamel, Nadia and Bond, Caroline | 2017 | The use of a peer-mediated intervention for a pupil with autism spectrum disorder: Pupil, peer and staff perceptions |
| Hampton, L. and Ramoutar, L. and Muntzer, R. and Battistini, O. | 2019 | Investigating the use of video enhanced reflective practice (VERP) alongside the engagement profile and scale in a school for children with complex needs |
| Hoskin, Janet and Fawcett, Angela | 2014 | Improving the reading skills of young people with Duchenne muscular dystrophy in preparation for adulthood |
| Kaehne, Axel and Beyer, Stephen | 2013 | Supported employment for young people with intellectual disabilities facilitated through peer support: a pilot study |
| Levy, S. and Robb, A. J. and Jindal-Snape, D. | 2017 | Disability, personalisation and community arts: exploring the spatial dynamics of children with disabilities participating in inclusive music classes |
| Syrdal, D. S. and Dautenhahn, K. and Robins, B. and Karakosta, E. and Jones, N. C. | 2020 | Kaspar in the wild: Experiences from deploying a small humanoid robot in a nursery school for children with autism |
| **Intervention/exposure: wrong Exposure** | | |
| Pollard, Rachel and Hogan, Sarah | 2021 | Parental and Practitioner Views of Telepractice for Pediatric Auditory Verbal Habilitation at a Time of Global Pandemic |
| Spain, D. and Stewart, G. R. and Mason, D. and Milner, V. and Fairhurst, B. and Robinson, J. and Gillan, N. and Ensum, I. and Stark, E. and Happe, F. | 2022 | Telehealth Autism Diagnostic Assessments With Children, Young People, and Adults: Qualitative Interview Study With England-Wide Multidisciplinary Health Professionals |
| **Intervention/exposure: intervention ineffective** | | |
| Kaehne, A. and Catherall, C. | 2013 | User involvement in service integration and carers' views of co-locating children's services |
| Lendrum, A. and Humphrey, N. and Wigelsworth, M. | 2013 | Social and emotional aspects of learning (SEAL) for secondary schools: Implementation difficulties and their implications for school-based mental health promotion |
| **Intervention/exposure: intervention aimed at family, not child/young person** | | |
| Bjornstad, G. and Cuffe-Fuller, B. and Ukoumunne, O. C. and Fredlund, M. and McDonald, A. and Wilkinson, K. and Lloyd, J. and Hawton, A. and Berry, V. and Tarrant, M. and Borek, A. and Fitzpatrick, K. and Gillett, A. and Rhodes, S. and Logan, S. and Morris, C. | 2021 | Healthy Parent Carers: feasibility randomised controlled trial of a peer-led group-based health promotion intervention for parent carers of disabled children |
| Connolly, M. and Gersch, I. | 2013 | A support group for parents of children on a waiting list for an assessment for autism spectrum disorder |
| Gettings, S. and Franco, F. and Santosh, P. J. | 2015 | Facilitating support groups for siblings of children with neurodevelopmental disorders using audio-conferencing: A longitudinal feasibility study |
| Gore, Nick and Bradshaw, Jill and Hastings, Richard and Sweeney, Joanne and Austin, Debbie | 2022 | Early positive approaches to support (EPAtS): Qualitative experiences of a new support programme for family caregivers of young children with intellectual and developmental disabilities |
| Hall, Trevor A. and Mastel, Sarah and Nickel, Robert and Wainer, Allison | 2019 | Parents training parents: Lessons learned from a study of reciprocal imitation training in young children with autism spectrum disorder |
| Yesufu-Udechuku, A. and Harrison, B. and Mayo-Wilson, E. and Young, N. and Woodhams, P. and Shiers, D. and Kuipers, E. and Kendall, T. | 2015 | Interventions to improve the experience of caring for people with severe mental illness: systematic review and meta-analysis |
| **Not SEND** | | |
| Aldiss, S. and Baggott, C. and Gibson, F. and Mobbs, S. and Taylor, R. M. | 2015 | A critical review of the use of technology to provide psychosocial support for children and young people with long-term conditions |
| Bennett, S. D. and Au, C. and Byford, S. and Chorpita, B. and Coughtrey, A. E. and Cross, J. H. and Dalrymple, E. and Fonagy, P. and Ford, T. and Heyman, I. and Lewins, A. and Moss-Morris, R. and Reilly, C. and Xu, L. and Shafran, R. | 2021 | Feasibility of telephone-delivered therapy for common mental health difficulties embedded in pediatric epilepsy clinics |
| Beringer, A. J. and Heckford, E. J. | 2014 | Was there a plan? End-of-life care for children with life-limiting conditions: a review of multi-service healthcare records |
| Biddle, L. and Rifkin-Zybutz, R. and Derges, J. and Turner, N. and Bould, H. and Sedgewick, F. and Gooberman-Hill, R. and Moran, P. and Linton, M. J. | 2022 | Developing good practice indicators to assist mental health practitioners to converse with young people about their online activities and impact on mental health: a two-panel mixed-methods Delphi study |
| Bloyce, Jackie and Frederickson, Norah and Jackie, Bloyce and Norah, Frederickson | 2012 | Intervening to improve the transfer to secondary school |
| Brewer, R. | 2020 | Chicken Club: schools and their relationship with families |
| Camfield, P. R. and Andrade, D. and Camfield, C. S. and Carrizosa-Moog, J. and Appleton, R. and Baulac, M. and Brown, L. and Menachem, E. B. and Cross, H. and Desguerre, I. and Grant, C. and Hosny, H. and Jurasek, L. and Mula, M. and Pfafflin, M. and Rheims, S. and Ring, H. and Shellhaas, R. A. and Vinayan, K. P. and Wirrell, E. and Nabbout, R. | 2019 | How can transition to adult care be best orchestrated for adolescents with epilepsy? |
| Catanzano, M. and Bennett, S. D. and Kerry, E. and Liang, H. and Heyman, I. and Coughtrey, A. E. and Fifield, K. and Taylor, C. and Dalgleish, T. and Xu, L. and Shafran, R. | 2021 | Evaluation of a mental health drop-in centre offering brief transdiagnostic psychological assessment and treatment for children and adolescents with long-term physical conditions and their families: a single-arm, open, non-randomised trial |
| Colver, A. and Rapley, T. and Parr, J. R. and McConachie, H. and Dovey-Pearce, G. and Couteur, A. L. and McDonagh, J. E. and Bennett, C. and Maniatopoulos, G. and Pearce, M. S. and Reape, D. and Chater, N. and Gleeson, H. and Vale, L. | 2020 | Facilitating transition of young people with long-term health conditions from children's to adults' healthcare services - implications of a 5-year research programme |
| Colver, Allan and Rapley, Tim and Parr, Jeremy R. and McConachie, Helen and Dovey-Pearce, Gail and Le Couteur, Ann and McDonagh, Janet E. and Bennett, Caroline and Maniatopoulos, Gregory and Pearce, Mark S. and Reape, Debbie and Chater, Nichola and Gleeson, Helena and Vale, Luke | 2020 | Facilitating transition of young people with long-term health conditions from children's to adults' healthcare services -- implications of a 5-year research programme |
| Davidson, S. K. and Sanci, L. and de Nicolas Izquierdo, C. and Watson, C. J. and Baltag, V. and Sawyer, S. M. | 2022 | Best Practice During Teleconsultations With Adolescents: A Scoping Review |
| Fay, Bradley and Ashcroft, Darren M. and Crossley, Nick | 2018 | Negotiating inter-professional interaction: playing the general practitioner-pharmacist game |
| Hodgson, A. and Spours, K. and Smith, D. and Jeanes, J. | 2019 | Beyond employer engagement and skills supply: building conditions for partnership working and skills co-production in the English context |
| Hodgson, Eleanor and Stuart, Jenny Ruth and Train, Charlotte and Foster, Michael and Lloyd, Leon | 2019 | A Qualitative Study of an Employment Scheme for Mentors with Lived Experience of Offending Within a Multi-Agency Mental Health Project for Excluded Young People |
| Maniatopoulos, G. and Le Couteur, A. and Vale, L. and Colver, A. | 2018 | Falling through the gaps: exploring the role of integrated commissioning in improving transition from children's to adults' services for young people with long-term health conditions in England |
| Smith, Clare and Gibbard, Deborah and Higgins, Louise | 2017 | An Evaluation of an Integrated Model of Speech and Language Therapy in Public Health Practice for Early Language Development |
| Thompson, Talia and Stinnett, Nicole and Tartaglia, Nicole and Davis, Shanlee and Janusz, Jennifer | 2022 | 'I Wish the School Had a Better Understanding of the Diagnosis': parent perspectives on educational needs of students with sex chromosome aneuploidies |
| خطية, عدالله; (Khataybeh, A) | 2021 | الضغوط النفسية وعلاقتها بالتحصيل المهاري والمعرفي في الجمباز لدى طلبة قسم التربية البدنية بجامعة آل البيت (Psychological Stress and its Relationship to The Skill and Cognitive Achievement in ABSTRACT Gymnastics for Students of the Department of Physical Education at Al Al-Bayt University) |
| **SEND not separated** | | |
| Colver, A. and McConachie, H. and Le Couteur, A. and Dovey-Pearce, G. and Mann, K. D. and McDonagh, J. E. and Pearce, M. S. and Vale, L. and Merrick, H. and Parr, J. R. and Transition Collaborative, Group | 2018 | A longitudinal, observational study of the features of transitional healthcare associated with better outcomes for young people with long-term conditions |
| Cope, Stephanie | 2015 | Ensuring that 'hard to reach' young people agree to health assessments |
| Ward, J. and Crawford, S. and Solity, J. | 2017 | Applying assessment through teaching and instructional psychology: An alternative model of service delivery to raise attainment in primary schools |
| Williams-Brown, Z. and Jopling, M. | 2021 | ‘Measuring a plant doesn’t help it to grow’: teachers’ perspectives on the standards agenda in England |
| Wolpert, Miranda and Humphrey, Neil and Belsky, Jay and Deighton, Jessica | 2013 | Embedding mental health support in schools: learning from the Targeted Mental Health in Schools (TaMHS) national evaluation |
| **Date: Included UK studies published too early** | | |
| Asamoah, Edward and Tam, Cherry Hau-lin and Cudjoe, Ebenezer | 2021 | A systematic review of the roles of social workers in inclusive education for children with disabilities |
| Bartlett, Heather | 2015 | Can school nurses identify mental health needs early and provide effective advice and support? |
| Behan, C. and Masterson, S. and Clarke, M. | 2017 | Systematic review of the evidence for service models delivering early intervention in psychosis outside the stand-alone centre |
| Gwernan-Jones, R. and Moore, D. A. and Garside, R. and Richardson, M. and Thompson-Coon, J. and Rogers, M. and Cooper, P. and Stein, K. and Ford, T. | 2015 | ADHD, parent perspectives and parent-teacher relationships: Grounds for conflict |
| Koerting, J. and Smith, E. and Knowles, M. M. and Latter, S. and Elsey, H. and McCann, D. C. and Thompson, M. and Sonuga-Barke, E. J. | 2013 | Barriers to, and facilitators of, parenting programmes for childhood behaviour problems: a qualitative synthesis of studies of parents' and professionals' perceptions |
| Kwok, K. H. R. and Yuan, S. N. V. and Ougrin, D. | 2016 | Review: Alternatives to inpatient care for children and adolescents with mental health disorders |
| **Not UK: UK not separated** | | |
| Anderson, Joanna K. and Newloveâ€Delgado, Tamsin and Ford, Tamsin J. | 2022 | Annual Research Review: A systematic review of mental health services for emerging adults – moulding a precipice into a smooth passage |
| Beck, Gillian J. and Hazzard, Donna and McPhillips, TherÃ©se and Tiernan, Barbara and Casserly, Ann-Marie | 2017 | Dyslexia Policy and Practice: Cross-Professional and Parental Perspectives on the Northern Ireland Context |
| Beqiraj, Lorena and et, al | 2022 | Positive behavioural support for children and young people with developmental disabilities in special education settings: a systematic review |
| Byford, S. and Petkova, H. and Stuart, R. and Nicholls, D. and Simic, M. and Ford, T. and Macdonald, G. and Gowers, S. and Roberts, S. and Barrett, B. and Kelly, J. and Kelly, G. and Livingstone, N. and Joshi, K. and Smith, H. and Eisler, I. | 2019 | Alternative community-based models of care for young people with anorexia nervosa: the CostED national surveillance study |
| Cooper, M. and Evans, Y. and Pybis, J. | 2016 | Interagency collaboration in children and young people's mental health: a systematic review of outcomes, facilitating factors and inhibiting factors |
| Dillenburger, K. and Keenan, M. and Doherty, A. and Byrne, T. and Gallagher, S. | 2012 | ABA-Based Programs for Children Diagnosed With Autism Spectrum Disorder: Parental and Professional Experiences at School and at Home |
| Eke, H. and Hunt, H. and Ball, S. and Rogers, M. and Whear, R. and Allinson, A. and Melluish, J. and Lindsay, C. and Richardson, D. and Rogers, J. and Hutton, E. and Madden, N. and Wright, A. and Anderson, R. and Logan, S. and Thompson Coon, J. and Morris, C. | 2021 | Improving continence in children and young people with neurodisability: a systematic review and survey |
| French, B. and Sayal, K. and Daley, D. | 2019 | Barriers and facilitators to understanding of ADHD in primary care: a mixed-method systematic review |
| Gallagher, Aoife L. and Murphy, Carolâ€Anne and Conway, Paul and Perry, Alison | 2019 | Consequential differences in perspectives and practices concerning children with developmental language disorders: an integrative review |
| Gondek, D. and Edbrooke-Childs, J. and Velikonja, T. and Chapman, L. and Saunders, F. and Hayes, D. and Wolpert, M. | 2017 | Facilitators and Barriers to Person-centred Care in Child and Young People Mental Health Services: A Systematic Review |
| Hart, Angie and et, al | 2020 | Transitions into work for young people with complex needs: a systematic review of UK and Ireland studies to improve employability |
| Krikheli, Lillian and Erickson, Shane and Carey, Lindsay B. and Carey-Sargeant, Christa L. and Mathisen, Bernice A. | 2020 | Perspectives of Speech and Language Therapists in Paediatric Palliative Care: An International Exploratory Study |
| O'Dea, Aine and Robinson, Katie and Coote, Susan | 2020 | Effectiveness of interventions to improve participation outcomes for children with developmental coordination disorder: a systematic review |
| Shelemy, D. L. and Harvey, D. K. and Waite, D. P. | 2020 | Meta-analysis and systematic review of teacher-delivered mental health interventions for internalizing disorders in adolescents |
| Vusio, Frane and Thompson, Andrew and Birchwood, Max and Clarke, Latoya | 2016 | Experiences and satisfaction of children, young people and their parents with alternative mental health models to inpatient settings: a systematic review |
| Yee, J. S. R. and White, H. |  | The Goldilocks Conundrum: The ‘Just Right’ conditions for design to achieve impact in public and third sector projects |
| **Duplicates** |  |  |
| Beaton, Mhairi C and Codina, Geraldene N and Wharton, Julie C | 2021 | Decommissioning normal: COVID‚Äê19 as a disruptor of school norms for young people with learning disabilities |
| Boshoff, Kobie and Bowen‚ÄêSalter, Holly and Gibbs, Deanna and Phillips, Rebecca L. and Porter, Lisa and Wiles, Louise | 2021 | A meta-synthesis of how parents of children with autism describe their experience of accessing and using routine healthcare services for their children |
| COOMBES, LINDSEY and ALLEN, DEBBY and HUMPHREY, DEBORAH | 2020 | In-depth Interviews 16 |
| Hafidh, R. and Sharif, M. S. and Al-Bayatti, A. H. and Alfakeeh, A. S. | 2020 | An effective knowledge-based modeling approach towards a ‘Smart-School Care Coordination system’ for children and young people with special educational needs ‚Ä¶ |
| Hunter, C. and Maciver, D. and Howden, S. and Forsyth, K. and Adamson, A. | 2013 | Identification of a common language describing paediatric physiotherapy practice for children with additional support needs, to support communication with those ‚Ä¶ |
| Jones, Christine and Stalker, Kirsten and Franklin, Anita and Fry, Deborah and Cameron, Audrey and Taylor, Julie | 2017 | Enablers of help-seeking for deaf and disabled children following abuse and barriers to protection: a qualitative study |
| Kaehne, Axel and Beyer, Stephen | 2014 | Person-centred reviews as a mechanism for planning the post-school transition of young people with intellectual disability |
| Mengoni, Silvana E and Bardsley, Janet and Oates, John | 2016 | Document Version |
| Mowat, J. G. | 2015 | ‘Inclusion - - that word!’ examining some of the tensions in supporting pupils experiencing social, emotional and behavioural difficulties/needs |
