# Supplementary material for: Improving partnerships to improve outcomes for children and young people with special educational needs and disabilities: qualitative findings from a mixed methods systematic review
Source: Frontiers journal article supplement (doi:10.3389/feduc.2025.1513668), 2025-02-19
Supplement: Table_6.docx [file Table_6.docx]

# Supplementary File 6: List of included studies (Qualitative and mixed methods only)

1. Abbott D, Jessiman P. ‘It's afforded us a huge flexibility’: the impact of ‘Disabled Children's Access to Childcare Pilots’ on families with a disabled child in England. Community Work and Family. 2014;17(4):456-66.

2. Adrian N, Smith JG. Occupied bed days a redundant currency? An evaluation of the first 10 years of an integrated model of care for mentally ill adolescents. Clinical Child Psychology and Psychiatry. 2015;20(3):458-71.

3. Alderson H, Mayrhofer A, Smart D, Muir C, McGovern R. An innovative approach to delivering a family-based intervention to address parental alcohol misuse: qualitative findings from a pilot project. International Journal of Environmental Research and Public Health. 2022;19(13):8086.

4. Ang CS, MacDougall FA. An evaluation of animal-assisted therapy for autism spectrum disorders: therapist and parent perspectives. Psychological Studies. 2022;67(1):72-81.

5. Ani C, Ayyash HF, Ogundele MO. Community paediatricians' experience of joint working with child and adolescent mental health services: findings from a British national survey. BMJ Paediatrics Open. 2022;6(1):e001381.

6. Apanasionok MM, Alallawi B, Grindle CF, Hastings RP, Watkins RC, Nicholls G, et al. Teaching early numeracy to students with autism using a school staff delivery model. British Journal of Special Education. 2021;48(1):90-111.

7. Azorín Abellán CM. La respuesta a la diversidad del alumnado en el context inglés: Un studio de casos [Responding to student diversity in the English context: case studies]. 2016;34(2):77-91.

8. Barlow J, Coe C. Integrating partner professionals. The Early Explorers project: Peers Early Education Partnership and the health visiting service. Child: Care, Health and Development. 2013;39(1):36-43.

9. Bason L. The practice of person-centred planning within transition person-centred reviews for young people with send at post-16 transition: gains, barriers and challenges. Educational and Child Psychology. 2020;37:68-79.

10. Benjamin L, Newton C, Ebbels S. Investigating the effectiveness of idiom intervention for 9-16-year-olds with developmental language disorder. International Journal of Language and Communication Disorders. 2020;55(2):266-86.

11. Beresford B, Clarke S, Maddison J. Therapy interventions for children with neurodisabilities: a qualitative scoping study. Health Technology Assessment (Winchester, England). 2018;22(3):1-150.

12. Beyer S, Meek A, Davies A. Supported work experience and its impact on young people with intellectual disabilities, their families and employers. Advances in Mental Health and Intellectual Disabilities. 2016;10(3):207-20.

13. Boddison A, Soan S. The Coproduction illusion: considering the relative success rates and efficiency rates of securing an Education, Health and Care plan when requested by families or education professionals. Journal of Research in Special Educational Needs. 2022;22(2):91-104.

14. Boesley L, Crane L. ‘Forget the health and care and just call them education plans’: SENCOs' perspectives on Education, Health and Care Plans. Journal of Research in Special Educational Needs. 2018;18(S1):36-47.

15. Bond C, Hebron J. Developing mainstream resource provision for pupils with autism spectrum disorder: staff perceptions and satisfaction. European Journal of Special Needs Education. 2016;31(2):250-63.

16. Botterill S, Cottam S, Fowke A, Theodore K. “It put control back onto my family situation”: family experiences of positive behaviour support. Advances in Mental Health and Intellectual Disabilities. 2019;13(3/4):91-101.

17. Bradley K, Male D. 'Forest School is muddy and I like it': Perspectives of young children with autism spectrum disorders, their parents and educational professionals. Educational and Child Psychology. 2017;34:80-96.

18. Brimblecombe N, Knapp M, Murguia S, Mbeah-Bankas H, Crane S, Harris A, et al. The role of youth mental health services in the treatment of young people with serious mental illness: 2-year outcomes and economic implications. Early intervention in psychiatry. 2017;11(5):393-400.

19. Broadhurst S, Yates K, Mullen B. An evaluation of the My Way transition programme. Tizard Learning Disability Review. 2012;17(3):124-34.

20. Bunn H, Boesley L. My New School: transition to high school for children with special educational needs in England – findings and ideas for practice. Support for Learning. 2019;34(2):128-47.

21. Bunn H, Davis D, Speed E. High school transition – an intervention that empowers children with special educational needs and improves school practice. Support for Learning. 2017;32(3):231-44.

22. Burbach FR, Stiles KM. Digital mental health and neurodevelopmental services: case-based realist evaluation. JMIR Formative Research. 2021;5(9).

23. Camilleri N, Newbury‐Birch D, McArdle P, Stocken DD, Thick T, Le Couteur A. Innovations in Practice: a case control and follow-up study of 'hard to reach' young people who suffered from multiple complex mental disorders. Child & Adolescent Mental Health. 2017;22(1):49-57.

24. Cassidy C, Marwick H, Deeney L, McLean G. Philosophy with children, self-regulation and engaged participation for children with emotional-behavioural and social communication needs. Emotional and Behavioural Difficulties. 2018;23(1):81-96.

25. Castro S, Grande C, Palikara O. Evaluating the quality of outcomes defined for children with Education Health and Care plans in England: A local picture with global implications. Research in Developmental Disabilities. 2019;86:41-52.

26. Castro-Kemp S, Gaona C, Grande C, Palikara O. Consistency between provision, outcomes and functioning needs in statutory documents for young children with developmental disabilities in England. Research in Developmental Disabilities. 2021;108:103815.

27. Castro-Kemp S, Palikara O, Grande C. Status quo and inequalities of the statutory provision for young children in england, 40 years on from Warnock. Frontiers in Education [Internet]. 2019 [cited 28 April 2023]; 4. Available from: http://dx.doi.org/10.3389/feduc.2019.00076

28. Chambers ME, Sugden DA. Intervention for young children displaying coordination disorders. Journal of Early Childhood Research. 2016;14(2):115-31.

29. Choudhury D, Williams H. Strengthening the educational inclusion of young carers with additional needs: an eco-systemic understanding. Educational Psychology in Practice. 2020;36(3):241-56.

30. Cobbett S. Reaching the hard to reach: quantitative and qualitative evaluation of school-based arts therapies with young people with social, emotional and behavioural difficulties. Emotional and Behavioural Difficulties. 2016;21(4):403-15.

31. Collins F, McCray J. Relationships, learning and team working in UK services for children. Journal of Integrated Care. 2012;20(1):39-50.

32. Connor C, Birchwood M, Freemantle N, Palmer C, Channa S, Barker C, et al. Don't turn your back on the symptoms of psychosis: the results of a proof-of-principle, quasi-experimental intervention to reduce duration of untreated psychosis. BMC Psychiatry. 2016;16:127.

33. Coopey E, Johnson G. Exploring the experience of young people receiving treatment for an eating disorder: family therapy for anorexia nervosa and multi-family therapy in an inpatient setting. Journal of Eating Disorders. 2022;10(1):101.

34. Corrigan E. Person centred planning 'in action': exploring the use of person centred planning in supporting young people's transition and re-integration to mainstream education. British Journal of Special Education. 2014;41(3):268-88.

35. Cortina MA, Fazel M. The Art Room: an evaluation of a targeted school-based group intervention for students with emotional and behavioural difficulties. Arts in Psychotherapy. 2015;42:35-40.

36. Cosma P, Mulcare R. EHCPs: A help or a hinderance to the inclusion of young people who have offended? an exploration of EP’s perceptions of the facilitating factors and barriers of EHCPs and the SEN processes involved in Youth Justice. Educational and Child Psychology. 2022;39:42-55.

37. Crane L, Davies J, Fritz A, O’Brien S, Worsley A, Remington A. Autistic young people’s experiences of transitioning to adulthood following the Children and Families Act 2014. British Educational Research Journal. 2022;48(1):22-48.

38. Crompton H, Hardy S. Preparing to improve access for young people's mental healthcare. Practice Nursing. 2018;29(12):600-5.

39. Cross M, Clarke T. Rapid response pathway united to reduce self-harm (RUSH): a case study of a pilot pathway for children and young people. Journal of Public Mental Health. 2022;21(1):15-22.

40. Cunningham A, Harvey K, Waite P. School staffs’ experiences of supporting children with school attendance difficulties in primary school: a qualitative study. Emotional and Behavioural Difficulties. 2022;27(1):72-87.

41. Curran H. ‘The SEND Code of Practice has given me clout’: a phenomenological study illustrating how SENCos managed the introduction of the SEND reforms. British Journal of Special Education. 2019;46(1):76-93.

42. Curran H, Mortimore T, Riddell R. Special Educational Needs and Disabilities reforms 2014: SENCos’ perspectives of the first six months. British Journal of Special Education. 2017;44(1):46-64.

43. Dale NJ, Sakkalou E, O'Reilly MA, Springall C, Sakki H, Glew S, et al. Home-based early intervention in infants and young children with visual impairment using the Developmental Journal: longitudinal cohort study. Developmental Medicine and Child Neurology. 2019;61(6):697-709.

44. Daniunaite A, Cooper M, Forster T. Counselling in UK primary schools: outcomes and predictors of change. Counselling and Psychotherapy Research. 2015;15(4):251-61.

45. Dawson A. Getting child psychotherapy right for every child: developing a clinical formulation tool for effective and accountable multi-agency work. Journal of Child Psychotherapy. 2020;46(2):133-51.

46. Day C, Michelson D, Thomson S, Penney C, Draper L. Evaluation of a peer led parenting intervention for disruptive behaviour problems in children: community based randomised controlled trial. BMJ. 2012;344:e1107.

47. Dillon J, Pratt S. An evaluation of the impact of an integrated multidisciplinary therapeutic team on the mental health and well-being of young people in an educational setting. Pastoral Care in Education. 2019;37(2):126-42.

48. Dunsmuir S, Cline T, Crafter S, Lang J. Challenges in planning transition to adulthood for young people who have special educational needs and disabilities: professional and managerial perspectives. Journal of Research in Special Educational Needs. 2020;20(1):27-37.

49. Evans C, Sanders D, Knight R. Lego Therapy Club for children with high functioning autism and Asperger's syndrome. Clinical Psychology Forum. 2014;2014(262):18-21.

50. Fenner M, Kleve L. An evaluation of a CAMHS outpatient service for adolescent eating disorders. Child and Adolescent Mental Health. 2014;19(1):64-8.

51. Foran D, Hoerger M, Philpott H, Jones EW, Hughes JC, Morgan J. Using applied behaviour analysis as standard practice in a UK special needs school. British Journal of Special Education. 2015;42(1):34-52.

52. Forbes J, McCartney E, McKean C, Laing K, Cockerill M, Law J. Co/productive practitioner relations for children with SLCN: an affect inflected agentic frame. Discourse: Studies in the Cultural Politics of Education. 2019;40(6):859-72.

53. Francis YJ, Sanders L. Using a quality first communication approach: Working systemically to support young people with speech language and communication needs in the youth justice system. Educational and Child Psychology: British Psychological Society; 2022. p. 102-20.

54. Fukutomi A, Austin A, McClelland J, Brown A, Glennon D, Mountford V, et al. First episode rapid early intervention for eating disorders: A two-year follow-up. Early intervention in psychiatry. 2020;14(1):137-41.

55. Geiger S, Freedman R, Johnston L. Using action research to develop quality 16+ further education provision for young people with complex needs. Educational and Child Psychology. 2015;32:81-91.

56. Gray L, Gibbs J, Jolleff N, Williams J, McConachie H, Parr JR. Variable implementation of good practice recommendations for the assessment and management of UK children with neurodisability. Child: Care, Health and Development. 2015;41(6):938-46.

57. Green LL, Dicks J. Being there for each other – who fills the gaps? A case of a young person with a neurological disability by a children's social worker and a case manager. Social Care and Neurodisability. 2012;3(1):5-13.

58. Griffiths H, Noble A, Duffy F, Schwannauer M. Evaluating clinical outcome and service utilization in an AMBIT-trained Tier 4 child and adolescent mental health service. Child & Adolescent Mental Health. 2017;22(3):170-4.

59. Hall CL, Selby K, Guo B, Valentine AZ, Walker GM, Hollis C. An objective measure of attention, impulsivity and activity reduces time to confirm attention deficit/hyperactivity disorder diagnosis in children – a completed audit cycle. Child and Adolescent Mental Health. 2016;21(3):175-8.

60. Hebron J, Bond C. Developing mainstream resource provision for pupils with autism spectrum disorder: parent and pupil perceptions. European Journal of Special Needs Education. 2017;32(4):556-71.

61. Hellawell B, Smith S, Wharton J. ‘What was required above all else was collaboration’: keeping the momentum for SEND partnership working in the wake of Covid-19. British Journal of Special Education. 2022;49(2):148-67.

62. Hodder M, Syson T, Aziz Z, Handy A, Khan H, Lancaster J. A reflective evaluation of the Bradford positive behaviour support – in reach service. Tizard Learning Disability Review. 2020;25(4):185-92.

63. Holland J, Pell G. Parental perceptions of the 2014 SEND legislation. Pastoral Care in Education. 2017;35(4):293-311.

64. Holmes L, McDermid S. The Common Assessment Framework: the impact of the lead professional on families and professionals as part of a continuum of care in England. Child & Family Social Work. 2016;21(4):530-8.

65. Hoskin J. Aspiration, austerity and ableism: to what extent are the 2014 SEND reforms supporting young people with a life‐limiting impairment and their families to get the lives they want? British Journal of Special Education. 2019;46(3):265-91.

66. House J, Schmidt U, Craig M, Landau S, Simic M, Nicholls D, et al. Comparison of specialist and nonspecialist care pathways for adolescents with anorexia nervosa and related eating disorders. International Journal of Eating Disorders. 2012;45(8):949-56.

67. Humphrey N, Lendrum A, Barlow A, Wigelsworth M, Squires G. Achievement for All: improving psychosocial outcomes for students with special educational needs and disabilities. Research in Developmental Disabilities. 2013;34(4):1210-25.

68. Hutton E, King A. Parent/carer views on personal health budgets for disabled children who use rehabilitation therapy services. Disability & Society. 2017;33(2):254-71.

69. Iemmi V, Knapp M, Reid C, Sholl C, Ferdinand M, Buescher A, et al. Positive behavioural support for children and adolescents with learning disabilities and behaviour that challenges: An initial exploration of service use and costs. Tizard Learning Disability Review. 2016;21(4):169-80.

70. Ireland P, Horridge KA. The Health, Functioning and Wellbeing Summary Traffic Light Communication Tool: a survey of families' views. Developmental Medicine and Child Neurology. 2017;59(6):661-4.

71. Jago S, Radford J. SLT Beliefs about Collaborative Practice: Implications for Education and Learning. Child Language Teaching and Therapy. 2017;33(2):199-213.

72. James DM, Fisher S, Vincent S. Challenging behaviour around challenging behaviour. Journal of Applied Research in Intellectual Disabilities. 2021;34(4):1166-79.

73. Janssens A, et a. The transition from children's services to adult services for young people with attention deficit hyperactivity disorder: the CATCh-uS mixed-methods study. Health and Social Care Delivery Research. 2020;8(42).

74. Jeffes B. Raising the reading skills of secondary-age students with severe and persistent reading difficulties: evaluation of the efficacy and implementation of a phonics-based intervention programme. Educational Psychology in Practice. 2016;32(1):73-84.

75. Kaehne A. Multi-agency protocols as a mechanism to improve partnerships in public services. Local Government Studies. 2015;41(3):321-38.

76. Kaehne A, Beyer S. Person-centred reviews as a mechanism for planning the post-school transition of young people with intellectual disability. Journal of Intellectual Disability Research. 2014;58(7):603-13.

77. Kendall L. Supporting all children to reach their potential: practitioner perspectives on creating an inclusive school environment. Education 3-13. 2019;47(6):678-91.

78. Kennedy EK. The Revised SEND Code of Practice 0-25: effective practice in engaging children and young people in decision-making about interventions for social, emotional and mental health needs. Support for Learning. 2015;30(4):364-80.

79. Kennedy R, Binns F, Brammer A, Grant J, Bowen J, Morgan R. Continuous service quality improvement and change management for children and young people with autism and their families: A model for change. Comprehensive Child and Adolescent Nursing. 2016;39(3):192-214.

80. Kirk G, Duschinsky R. On the margins of the child protection system: creating space for relational social work practice. Child & Family Social Work. 2017;22(2):963-71.

81. Kolehmainen N, MacLennan G, Ternent L, Duncan EA, Duncan EM, Ryan SB, et al. Using shared goal setting to improve access and equity: a mixed methods study of the Good Goals intervention in children's occupational therapy. Implementation Science. 2012;7:76.

82. Kourmoulaki A. Nurture groups in a Scottish secondary school: purpose, features, value and areas for development. Emotional and Behavioural Difficulties. 2013;18(1):60-76.

83. Kwiatkowska G, Minnion A, Finch J. The RIX Wiki: the use of multimedia advocacy to support person-centred planning in a special needs secondary school – implications for current policy and practice. Support for Learning. 2021;36(4):512-31.

84. Lawrence N, Cahill S. The impact of dynamic assessment: an exploration of the views of children, parents and teachers. British Journal of Special Education. 2014;41(2):191-211.

85. Liao Y, Dillenburger K, Hu X. Behavior analytic interventions for children with autism: Policy and practice in the United Kingdom and China. Autism: The International Journal of Research & Practice. 2022;26(1):101-20.

86. Little M, Berry V, Morpeth L, Blower S, Axford N, Taylor R, et al. The impact of three evidence-based programmes delivered in public systems in Birmingham, UK. International Journal of Conflict and Violence. 2012;6(2):260-72.

87. Malkani R. Investigating the opportunities provided for young adults with special education needs and disabilities (SEND) to prepare for adulthood in a city in England. Support for Learning. 2021;36(2):238-57.

88. McCartney E, Muir M. School leavers with learning disabilities moving from child to adult Speech and Language Therapy (SLT) teams: SLTs’ views of successful and less successful transition co-working practices. Journal of Research in Special Educational Needs. 2017;17(3):168-78.

89. McFaul H, Mulgrew L, Smyth J, Titterington J. Applying evidence to practice by increasing intensity of intervention for children with severe speech sound disorder: a quality improvement project. BMJ Open Quality. 2022;11(2):05.

90. McKean C, Law J, Laing K, Cockerill M, Allon-Smith J, McCartney E, et al. A qualitative case study in the social capital of co-professional collaborative co-practice for children with speech, language and communication needs. International Journal of Language and Communication Disorders. 2016;52(4):514-27.

91. Mengoni S, Bardsley J, Oates J. An evaluation of key working for families of children and young people with special educational needs and disabilities. British Journal of Special Education. 2015;42(4):355-73.

92. Molteni P, Guldberg K, Logan N. Autism and multidisciplinary teamwork through the SCERTS Model. British Journal of Special Education. 2013;40(3):137-45.

93. Morino Y. Ideas of the change process: family and therapist perspectives on systemic psychotherapy for children with conduct disorder. Journal of Family Therapy. 2019;41(1):29-53.

94. Mowat JG. ‘Inclusion – that word!’ examining some of the tensions in supporting pupils experiencing social, emotional and behavioural difficulties/needs. Emotional and Behavioural Difficulties. 2015;20(2):153-72.

95. Neal S, Rice F, Ng-Knight T, Riglin L, Frederickson N. Exploring the longitudinal association between interventions to support the transition to secondary school and child anxiety. Journal of Adolescence. 2016;50:31-43.

96. O'Reilly M, Vostanis P, Taylor H, Day C, Street C, Wolpert M. Service user perspectives of multiagency working: A qualitative study with children with educational and mental health difficulties and their parents. Child and Adolescent Mental Health. 2013;18(4):202-9.

97. Ougrin D, Corrigall R, Stahl D, Poole J, Zundel T, Wait M, et al. Supported discharge service versus inpatient care evaluation (SITE): a randomised controlled trial comparing effectiveness of an intensive community care service versus inpatient treatment as usual for adolescents with severe psychiatric disorders: self-harm, functional impairment, and educational and clinical outcomes. European Child and Adolescent Psychiatry. 2021;30(9):1427-36.

98. Palikara O, Castro S, Gaona C, Eirinaki V. Capturing the voices of children in the education health and care plans: are we there yet? Frontiers in Education [Internet]. 2018 [cited 28 April 2023]; 3. Available from: http://dx.doi.org/10.3389/feduc.2018.00024.

99. Parker E. An actor-network theory reading of change for children in public care. British Educational Research Journal. 2017;43(1):151-67.

100. Payler JK, Georgeson J. Personal action potency: early years practitioners participating in interprofessional practice in early years settings. International Journal of Early Years Education. 2013;21(1):39-55.

101. Pearlman S, Michaels D. Hearing the voice of children and young people with a learning disability during the Educational Health Care Plan (EHCP). Support for Learning. 2019;34(2):148-61.

102. Pease A, Goodenough T, Roe J, Rogers S, Williams C. Perspectives of primary school staff who work with children with additional needs: Insights that may help to improve support for visually impaired children. British Journal of Visual Impairment. 2021;39(3):266-77.

103. Pinkard H. The perspectives and experiences of children with special educational needs in mainstream primary schools regarding their individual teaching assistant support. European Journal of Special Needs Education. 2021;36(2):248-64.

104. Pitts L, Gent S, Hoerger ML. Reducing pupils’ barriers to learning in a special needs school: integrating applied behaviour analysis into Key Stages 1–3. British Journal of Special Education. 2019;46(1):94-112.

105. Potterton R, Austin A, Flynn M, Allen K, Lawrence V, Mountford V, et al. “I’m truly free from my eating disorder”: Emerging adults’ experiences of FREED, an early intervention service model and care pathway for eating disorders. Journal of Eating Disorders. 2021;9(1):3.

106. Pratt K, Baird G, Gringras P. Ensuring successful admission to hospital for young people with learning difficulties, autism and challenging behaviour: a continuous quality improvement and change management programme. Child: Care, Health and Development. 2012;38(6):789-97.

107. Preece D, Howley M. An approach to supporting young people with autism spectrum disorder and high anxiety to re-engage with formal education–the impact on young people and their families. International Journal of Adolescence and Youth. 2018;23(4):468-81.

108. Reed S. Embedding effective autism knowledge and practice in mainstream primary schools: the development of a successful model for outreach. Support for Learning. 2019;34(3):242-53.

109. Richards H. “It was tough making sure it happened”: SENCo experience of the reality and risk of education and health care plan implementation. Educational Review. 2022.

110. Richardson TD, Jindal-Snape D, Hannah EFS. Impact of legislation on post-school transition practice for young people with additional support needs in Scotland. British Journal of Special Education. 2017;44(3):239-56.

111. Rocks S, Glogowska M, Stepney M, Tsiachristas A, Fazel M. Introducing a single point of access (SPA) to child and adolescent mental health services in England: a mixed-methods observational study. BMC Health Services Research. 2020;20(1):623.

112. Rose JO. Building bridges with other schools: educational partnerships in separate settings in England. Support for Learning. 2012;27(2):84-90.

113. Roughan LA, Stafford J. Demand and capacity in an ADHD team: reducing the wait times for an ADHD assessment to 12 weeks. BMJ Open Quality. 2019;8(4):e000653.

114. Rutherford M, Burns M, Gray D, Bremner L, Clegg S, Russell L, et al. Improving Efficiency and Quality of the Children's ASD Diagnostic Pathway: Lessons Learned from Practice. Journal of Autism and Developmental Disorders. 2018;48(5):1579-95.

115. Rutherford M, Lahood-Kullberg B. Pupils' views on visual timetables and labels in mainstream primary classrooms. Good Autism Practice. 2020;21(2):11-22.

116. Sales N, Vincent K. Strengths and limitations of the Education, Health and Care plan process from a range of professional and family perspectives. British Journal of Special Education. 2018;45(1):61-80.

117. Sfar-Gandoura H, Ryan GS, Melvin G. Evaluation of a drop-in clinic for young people with attention deficit hyperactivity disorder. Nursing Children and Young People. 2017;29(5):24-32.

118. Sharpe L, Coates J, Mason C. Voice, vlogs and visibility: the experiences of young people with SEND engaging in the school games. Sport, Education and Society. 2022;27(2):134-49.

119. Sinclair J, Holden S. The mental health surveillance of adolescents, within a school setting. Mental Health Review Journal. 2013;18(2):83-92.

120. Spruin E, Abbott N, Holt N. Examining the experiences of a short break scheme amongst adolescents with disabilities (service users) and their parents. International Journal of Disability, Development and Education. 2018;65(2):148-62.

121. Spyridakou C, Mendis S, DeVal D. Improving transition outcomes in adolescents with permanent hearing loss. BMJ Open Quality. 2019;8(2):e000336.

122. Steven A, Larkin V, Stewart J, Bateman B. The value of continuing professional development: a realistic evaluation of a multi-disciplinary workshop for health visitors dealing with children with complex needs. Nurse Education Today. 2018;67:56-63.

123. Stevens M. School-based support for children with conduct disorders; a qualitative longitudinal study of high-need families. British Educational Research Journal. 2018;44(5):781-801.

124. Stiles M. 'Do we make ourselves clear?' developing a social, emotional and behavioural difficulties (SEBD) support service's effectiveness in detecting and supporting children experiencing speech, language and communication difficulties (SLCD). Emotional and Behavioural Difficulties. 2013;18(2):213-32.

125. Street K, Costelloe S, Wootton M, Upton S, Brough J. Structured, supported feeding admissions for restrictive eating disorders on paediatric wards. Archives of Disease in Childhood. 2016;101(9):836-8.

126. Totsika V, Mandair S, Lindsay G. Comparing the effectiveness of evidence-based parenting programs on families of children with and without special educational needs: short-term and long-term gains. Frontiers in Education [Internet]. 2017 [cited 28 April 2023]; 2. Available from: http://dx.doi.org/10.3389/feduc.2017.00007.

127. Tovey E, Perez-Olaizola J, Annecke P, Tolmac J, Hodes M. The benefits of an adolescent psychiatric day service: the Harrow experience – a pilot study. Journal of Children's Services. 2012;7(4):275-84.

128. Turnbull JR, Hobson S, Vyas-Lee J, Lahoti B. Establishing and evaluating a multidisciplinary community-based sleep clinic for children with neurodevelopmental difficulties in Inner London. OBM Neurobiology. 2021;5(2).

129. Tysoe K, Vincent K, Boulton H. Implementing the 2014 SEND reforms in England: perspectives from SENCOs. Support for Learning. 2021;36(3):486-505.

130. Unwin GL, Stenfert Kroese B, Blumson J. An evaluation of a mental health promotion programme to improve emotional, social and coping skills in children and young people attending special schools. Frontiers in Education [Internet]. 2018 [cited 28 April 2023]; 3. Available from: http://dx.doi.org/10.3389/feduc.2018.00093.

131. Wall S. ‘A little whisper in the ear’: how developing relationships between pupils with attachment difficulties and key adults can improve the former’s social, emotional and behavioural skills and support inclusion. Emotional and Behavioural Difficulties. 2021;26(4):394-411.

132. Ward RJ, Kovshoff H, Kreppner J. School staff perspectives on ADHD and training: understanding the needs and views of UK primary staff. Emotional and Behavioural Difficulties. 2021;26(3):306-21.

133. White S, Spencer S. A school-commissioned model of speech and language therapy. Child Language Teaching and Therapy. 2018;34(2):141-53.

134. Willis J, Harrison A, Allen JL. Pupils with social, emotional and mental health special needs: perceptions of how restrictive physical interventions impact their relationships with teaching staff. Teaching and Teacher Education. 2021;97.

135. Wood-Downie H, Ward V, Ivil K, Kovshoff H, Parsons S. Using digital stories for assessments and transition planning for autistic pre-school children. Educational and Child Psychology. 2021;38:62-74.

136. Yates S, Gatsou L. Undertaking family-focused interventions when a parent has a mental illness - possibilities and challenges. Practice (09503153). 2021;33(2):103-18.

137. Zabel E, Donegan G, Lawrence K, French P. Exploring the impact of the recovery academy: a qualitative study of Recovery College experiences. Journal of Mental Health Training, Education & Practice. 2016;11(3):162-71.
